# Supplementary material for: Real-world effects of medications for chronic obstructive pulmonary disease: protocol for a UK population-based non-interventional cohort study with validation against randomised trial results
Source: PubMed Central journal article supplement (PMC5875594; doi:10.1136/bmjopen-2017-019475), 2018-03-25
Supplement: bmjopen-2017-019475.draft_revisions.pdf [file bmjopen-2017-019475.draft_revisions.pdf]

# BMJ Open

BMJ Open is committed to open peer review. As part of this commitment we make the peer review history of every article we publish publicly available.

When an article is published we post the peer reviewers' comments and the authors' responses online. We also post the versions of the paper that were used during peer review. These are the versions that the peer review comments apply to.

The versions of the paper that follow are the versions that were submitted during the peer review process. They are not the versions of record or the final published versions. They should not be cited or distributed as the published version of this manuscript.

BMJ Open is an open access journal and the full, final, typeset and author-corrected version of record of the manuscript is available on our site with no access controls, subscription charges or pay-per-view fees (<http://bmjopen.bmj.com>).

If you have any questions on BMJ Open's open peer review process please email [info.bmjopen@bmj.com](mailto:info.bmjopen@bmj.com)

# BMJ Open

## Real world effects of medications for chronic obstructive pulmonary disease: protocol for a UK population-based observational cohort study with validation against randomised trial results

|                               |                                                                                                                                                                                                                                                                                                                                                                                                                                                                                                                         |
|-------------------------------|-------------------------------------------------------------------------------------------------------------------------------------------------------------------------------------------------------------------------------------------------------------------------------------------------------------------------------------------------------------------------------------------------------------------------------------------------------------------------------------------------------------------------|
| Journal:                      | <i>BMJ Open</i>                                                                                                                                                                                                                                                                                                                                                                                                                                                                                                         |
| Manuscript ID                 | bmjopen-2017-019475                                                                                                                                                                                                                                                                                                                                                                                                                                                                                                     |
| Article Type:                 | Protocol                                                                                                                                                                                                                                                                                                                                                                                                                                                                                                                |
| Date Submitted by the Author: | 05-Sep-2017                                                                                                                                                                                                                                                                                                                                                                                                                                                                                                             |
| Complete List of Authors:     | Wing, Kevin; London School of Hygiene and Tropical Medicine, Williamson, Elizabeth; London School of Hygiene and Tropical Medicine, Carpenter, James; London School of Hygiene and Tropical Medicine Wise, Lesley; London School of Hygiene and Tropical Medicine Schneeweiss, Sebastian; Brigham and Womens' Hospital, Harvard Medical School<br>Smeeth, Liam; London School of Hygiene and Tropical Medicine Quint, Jennifer; Imperial College London<br>Douglas, Ian; London School of Hygiene and Tropical Medicine |
| Keywords:                     | Chronic airways disease < THORACIC MEDICINE, Epidemiology < THORACIC MEDICINE, CLINICAL PHARMACOLOGY, EPIDEMIOLOGY, PRIMARY CARE, PUBLIC HEALTH                                                                                                                                                                                                                                                                                                                                                                         |
|                               |                                                                                                                                                                                                                                                                                                                                                                                                                                                                                                                         |

SCHOLARONE™  
Manuscripts

Only

**TITLE PAGE**

**Title:** Real world effects of medications for chronic obstructive pulmonary disease: protocol for a UK population-based observational cohort study with validation against randomised trial results

**Authors:**Kevin Wing<sup>1\*</sup>Elizabeth Williamson<sup>2</sup>James Carpenter<sup>2</sup>Lesley Wise<sup>1</sup>Sebastian Schneeweiss<sup>3,4</sup>Liam Smeeth<sup>1</sup>Jennifer Quint<sup>5</sup>Ian Douglas<sup>1</sup>

<sup>1</sup>Department of Non-communicable Disease Epidemiology, Faculty of Epidemiology and Population Health, London School of Hygiene and Tropical Medicine, London, UK

<sup>2</sup>Department of Medical Statistics, Faculty of Epidemiology and Population Health, London School of Hygiene and Tropical Medicine, London, UK

<sup>3</sup>Department of Epidemiology, Harvard Medical School.

<sup>4</sup>Division of Pharmacoepidemiology and Pharmacoeconomics, Department of Medicine, Brigham & Women's Hospital

<sup>5</sup>National Heart and Lung Institute, Imperial College London, London, United Kingdom

**\*Submitting and corresponding author:** Kevin Wing ([kevin.wing@lshtm.ac.uk](mailto:kevin.wing@lshtm.ac.uk)), London School of Hygiene and Tropical Medicine, Keppel Street, London WC1E 7HT. Tel: +44 20 7636 8636, Fax: +44 20 7436 5389

## Funding statement

This work was supported by NIHR grant number 15/80/28

## Competing interests statement

Dr Wing and Dr Williamson declare no competing interests.

Professor Carpenter is funded 60% by a grant from the MRC, via a secondment to the MRC Clinical Trials Unit. The remaining funding is a combination of HEFCE and small contributions from various NIHR, ESRC, MRC and EU funds. He undertakes methodological consultancy work for Novartis and GlaxoSmithKline, and has given missing data courses for GlaxoSmithKline, Bayer and Boehringer.

Professor Smeeth reports grants from Wellcome, MRC, NIHR, BHF, Diabetes UK, ESRC and the EU; grants and personal fees for advisory work from GSK, and personal fees for advisory work from AstraZeneca. He is a Trustee of the British Heart Foundation.

Dr Wise is an independent consultant to the pharmaceutical industry and is employed to provide advice by a number of different companies none of which is involved in this therapeutic area.

Professor Schneeweiss is a consultant to WHISCON, LLC and to Aetion, Inc., a software manufacturer of which he also owns equity. He is principal investigator of investigator-initiated grants to the Brigham and Women's Hospital from Bayer, Genentech and Boehringer Ingelheim unrelated to the topic of this study. He does not receive personal fees from biopharmaceutical companies.

Professor Smeeth reports grants from Wellcome, MRC, NIHR, BHF, Diabetes UK, ESRC and the EU; grants and personal fees for advisory work from GSK, and personal fees for advisory work from AstraZeneca. He is a Trustee of the British Heart Foundation.

Dr Quint's research group has received funding from MRC, Wellcome, BLF, GSK, BI, AZ and Insmad for other projects, none of which relate to this work.

Dr Douglas is funded by an unrestricted grant from, has consulted for and holds stock in GlaxoSmithKline.

**Word count (not including abstract, tables, figures, or footnotes): 4386**

**Statement about prior postings and presentations:** This work has not been published elsewhere.

## Abstract

### Introduction

Chronic obstructive pulmonary disease (COPD) is a progressive disease affecting 3 million people in the UK, in which patients exhibit airflow obstruction that is not fully reversible. COPD treatment guidelines are largely informed by randomised controlled trial (RCT) results, but it is unclear if these findings apply to large patient populations not studied in trials. Observational studies could be used to study patient groups excluded from trials, but the use of these studies to estimate treatment effectiveness is in its infancy. In this study we will use individual trial data to validate observational methods for assessing COPD treatment effectiveness, before applying these methods to analysing treatment effectiveness within people excluded from, or under-represented in COPD trials.

### Methods and analysis

Using individual patient data from the landmark COPD TORCH trial, we will assemble a cohort in the UK Clinical Practice Research Datalink with similar characteristics to TORCH participants and test whether observational data can generate comparable results to trials, using cohort methodology with propensity score techniques to adjust for potential confounding. We will then use the methodological template we have developed to determine risks and benefits of COPD treatments in people excluded from TORCH. Outcomes are pneumonia, COPD exacerbation, mortality and time to treatment change. Groups to be studied include the elderly (>80 years), people with substantial comorbidity, people with and without underlying cardiovascular disease and people with mild COPD.

### Ethics and dissemination

Ethical approval has been granted by the LSHTM Medicines Ethics Committee (Ref: 11997). The study is under review by the Independent Scientific Advisory Committee (ISAC) of the UK Medicines and Healthcare Products Regulatory Agency (MHRA). An application to use the TORCH trial data made to [clinicalstudydatarequest.com](http://clinicalstudydatarequest.com) has been approved. In addition to scientific publications, dissemination methods will be developed based on discussions with COPD patient groups.

## Strengths and limitations of this study

### Strengths

- Large cohort study
- Use of validated methods for detecting COPD within the Clinical Practice Research Datatlink
- Use of randomised controlled trial (RCT) individual patient data to assess ability of observational methods to detect COPD treatment effects within an RCT-analagous population

### Limitations

- Adherence to medication will need to be assessed based on proxy variables (e.g. time covered by prescription)

# Introduction

## Background and rationale

Chronic obstructive pulmonary disease (COPD) affects 3 million people in the UK.<sup>1</sup> The most common cause is smoking, and patients exhibit airflow obstruction that is not fully reversible. The disease is progressive, with declining lung function and a worsening of symptoms. Most troublesome are acute exacerbations manifested as a sudden worsening of symptoms e.g. severe coughing, shortness of breath and chest congestion, requiring urgent treatment, and possibly hospitalisation. Whilst smoking cessation remains the most effective intervention, the rate of exacerbation can be reduced by regular medication such as combination long-acting beta-agonists (LABA) and inhaled corticosteroids (ICS) or long-acting muscarinic antagonists (LAMAs).<sup>2,3</sup>

COPD treatment guidelines are largely informed by randomised controlled trial (RCT) results,<sup>4</sup> but it is not clear if these findings apply to large patient populations not studied in trials. Fluticasone propionate + salmeterol (FP/SAL) is a LABA/ICS combination and is one of the most widely used COPD treatments. It was studied in large randomised trials (e.g. the TORCH trial),<sup>2</sup> but the effects of treatment in important patient groups who were not studied are unknown. Some were excluded from trials (e.g. those >80 years and those with substantial comorbidity) while others are under represented (e.g. people with mild COPD),<sup>2,5</sup> meaning conclusions about these groups are difficult to make.

Whilst the conduct of observational studies to investigate possible drug harms is well established, the use of these studies to estimate treatment effectiveness is in its infancy. Issues of treatment channelling and indication bias mean that measuring the intended benefit of a treatment is beset with difficulties. Over the next few years we will see more observational studies of drug effectiveness emerging due to recent legislation requiring pharmaceutical companies to study the real world effects of medications;<sup>6,7</sup> however, rigorous, validated methodology is needed to translate these complex data into reliable evidence.

In this study we will use TORCH<sup>2</sup> individual trial data to validate observational methods for assessing COPD treatment effectiveness, before going on to apply these methods to analysing treatment effectiveness within people excluded from or underrepresented in the TORCH trial. Observational data will be obtained from very large UK population-level databases of electronic health records. The results we generate will aid patients, prescribers and policy makers in deciding the most appropriate treatment for COPD for all types of patients. The approach used can also provide a template for treatment effectiveness research using observational data with inbuilt validation against a randomised trial.

## Aims and objectives

The aims of our study are (1) to measure the association between treatments for COPD and COPD exacerbation rate, mortality, pneumonia, and time to treatment change amongst patients not included in randomised clinical trials for COPD treatments and (2) to develop a methodological framework with in built validation against RCT data, for using observational electronic health records (EHR) to answer questions about drug treatment effects (i.e. both benefits and risks).

Specific objectives are to: (1) validate methods for measuring COPD medication effectiveness in EHR data by comparing with trial results; (2) use EHR data to measure COPD medication effectiveness in patients excluded from trials (most importantly those >80 years or with substantial comorbidity) and (3) determine COPD treatment effectiveness in an under-studied disease stage (mild COPD).

## Methods and analysis

### Study design

We have chosen a cohort study design as it will allow us to measure the effects of prescribing different treatments for COPD on future outcomes in different types of patients. Eligibility criteria for cohort entry will vary between objectives (detailed in the selection of participants section below).

### Setting/data sources

Patient data used in this study will be obtained from two different sources: the TORCH randomised trial and the UK Clinical Practices Research Datalink (CPRD) (linked to Hospital Episodes Statistics – HES – data).

### TORCH

TORCH was a placebo controlled randomised trial of the combined inhaler fluticasone propionate (FP) + salmeterol (SAL) (FP/SAL) for the treatment of COPD, published in 2007. Patients were randomised to receive FP/SAL, FP alone, SAL alone or placebo and the primary comparison of interest was between FP/SAL and placebo.<sup>2</sup> Key outcomes were expected benefits (rate of COPD exacerbation and mortality) and an expected harm due to the immunosuppressive action of the corticosteroid FP (pneumonia). Whilst findings for the primary endpoint of mortality were null, this was thought to be due to poor statistical power as a result of a lower than anticipated mortality rate. Nonetheless, a lower rate of exacerbations was seen with FP/SAL, and a higher rate of pneumonia was observed. As one of the largest trials in COPD, and with three year follow up, TORCH is a landmark study, providing a validation point for our study. We will obtain individual patient data



1 from the TORCH study via [www.clinicalstudydatarequest.com](http://www.clinicalstudydatarequest.com) for use in Objective 1 (see selection of  
2 participants section below)  
3

#### 4 **CPRD**

5 The CPRD is a very large database of prospectively collected, anonymised UK population-based  
6 electronic health records. CPRD primary care records comprise ~8-10% of the UK population and  
7 contain comprehensive information on clinical diagnoses, prescribing, referrals, tests and  
8 demographic/lifestyle factors.<sup>6</sup> In order to contribute to the database, general practices and other  
9 health centres must meet prespecified standards for research-quality data (i.e. be “up to standard”).  
10 Data quality/validity are therefore high and the data are nationally representative.<sup>6,7</sup> Linkage  
11 between the primary care records in CPRD and hospital episode statistics (HES) is well established  
12 for >60% of practices in the CPRD, providing a data set augmented with detailed secondary care  
13 diagnostic and procedural records. Validated algorithms have been established to identify COPD,  
14 COPD exacerbations and pneumonia (both hospital and primary care managed) in CPRD/HES linked  
15 data.<sup>9-11</sup>  
16  
17  
18  
19  
20  
21  
22  
23  
24

#### 25 **Selection of participants**

26 Participants will be selected from the CPRD. All patients will need to have been registered with an  
27 up-to standard practice for at least 12 months. Participant selection criteria will then vary by  
28 objective as detailed below.  
29  
30  
31

#### 32 **Objective 1: Validation of observational methods by comparing with trial results**

33 An overview of each of the steps for participant selection for Objective 1 is provided in Figure 1.  
34

##### 35 *Step 1*

36 We will select all patients in the CPRD with COPD who are eligible for HES-linkage and during the  
37 period covered by the linkage would have met the following eligibility criteria for inclusion in the  
38 TORCH study:  
39  
40  
41

- 42 • a diagnosis of COPD
- 43 • age 40-80 years
- 44 • lung function (FEV1<60% predicted, FEV1/FVC ratio <70%)
- 45 • smoking history
- 46 • no history of asthma
- 47 • no history of lung surgery
- 48 • no requirement for long-term oxygen therapy
- 49 • no diagnosed alpha-1 antitrypsin deficiency
- 50 • no evidence of drug/alcohol abuse
- 51 • no exposure to FP/SAL within the previous 4 weeks

52 Feasibility counts in the CPRD indicate there are ~13,000 patients meeting these criteria (Figure 1).  
53

##### 54 *Step 2*

1 Next we will determine if/when these patients ever received FP/SAL. During any time between  
2 attaining TORCH eligibility and a subsequent prescription for FP/SAL, patients will be eligible for  
3 inclusion as an unexposed patient in Objective 1. There may be multiple time periods within a  
4 person's record where eligibility as an unexposed patient is met (Figure 2). Feasibility work shows  
5 there are ~11,000 TORCH eligible patients in CPRD who did not receive FP/SAL at the time they  
6 attained TORCH eligibility and therefore have at least one time period that means they are eligible  
7 for inclusion as an Objective 1 unexposed participant (Figure 1). Individuals in CPRD who have more  
8 than one unexposed eligibility period within their record (Figure 2) will be able to contribute more  
9 than once to the pool of unexposed participants (with the covariates and person-time contributed  
10 unique to the specific unexposed eligibility period).

### 17 Step 3

18 Having obtained individual level patient data for TORCH participants from  
19 clinicalstudydatarequest.com, we will then match each TORCH participant (n=6,112) 1:1 with the  
20 closest available unexposed patient record in the CPRD pool of FPSAL untreated patients obtained in  
21 Step 2. Matching will be based on the following TORCH baseline characteristics:

- 25 • age
- 26 • sex
- 27 • body mass index
- 28 • previous treatment with:
  - 29 ○ inhaled corticosteroids
  - 30 ○ long acting beta-agonists
- 31 • history of COPD exacerbations
- 32 • history of cardiovascular disease
- 33 • lung function

34  
35  
36  
37 Where an individual from CPRD has multiple unexposed "eligibility periods" that can be matched to  
38 a TORCH participant, the CPRD characteristics that will be matched on will be those from the  
39 beginning of the specific eligibility period.

40  
41  
42 Some of the TORCH inclusion criteria will not be fully assessable using CPRD data (e.g. we will be  
43 able to assess whether patients are smokers but will not always know their pack year history). Hence  
44 the inclusion/exclusion criteria are analogous with TORCH criteria but we acknowledge they are not  
45 identical. Identification of criteria will be done based on algorithms already determined and by the  
46 identification of clinical codes in the CPRD. For those individuals that have contributed multiple  
47 unexposed records to the pool of CPRD unexposed participants (Figure 2), after one of their  
48 unexposed records has been matched to a TORCH participant we will remove all of their other  
49 unexposed records (meaning that an individual can only appear once in the final TORCH-matched  
50 unexposed cohort). We anticipate matching all or the majority of TORCH participants with a CPRD  
51  
52  
53  
54  
55  
56  
57  
58  
59  
60

1 patient, giving us a pool of TORCH-analogous untreated patients within CPRD, with similar baseline  
2 characteristics as TORCH participants at the point of randomisation (n~6,000, Figure 1).  
3

#### 4 *Step 4*

5 Following this, we will select all patients in CPRD meeting the TORCH eligibility criteria specified  
6 above, and who also received treatment with FP/SAL (either on the date of eligibility or at a later  
7 date). From feasibility work, we anticipate ~12,000 eligible FP/SAL treated patients (Figure 1), some  
8 of whom may have multiple time-periods of treated patient eligibility and therefore could contribute  
9 more than once to the initial pool of treated patients (Figure 2). In contrast to the unexposed  
10 TORCH-eligible cohort, our initial approach will not involve matching participants of the exposed  
11 TORCH-eligible cohort with participants from the TORCH trial, as this would negatively impact the  
12 ability to calculate propensity scores for receiving FP/SAL in Step 5. Note that there will be overlap  
13 between those selected as untreated (in Step 2) and as treated (in Step 4). Approximately 90% of the  
14 Step 4 treated patients will also have been eligible as Step 2 untreated patients, as they will have  
15 had periods where they were not treated with FP/SAL and met the Step 2 untreated eligibility  
16 criteria in addition to separate periods where they were treated with FP/SAL and met the Step 4  
17 treated eligibility criteria (Figure 2). If a person is included in both the untreated Step 2 and treated  
18 Step 4 cohorts, they will be contributing different periods of their person-time to each cohort (pre-  
19 FP/SAL treatment for Step 2 vs post-FP/SAL treatment for Step 4), and this will be handled in the  
20 analysis by assigning different index dates for Step 2 compared to Step 4.  
21  
22  
23  
24  
25  
26  
27  
28  
29  
30

#### 31 *Step 5*

32 We will combine the CPRD groups obtained in Steps 3 and 4 (n~18,000, see note in Step 4 relating to  
33 90% overlap) and using their baseline characteristics will calculate propensity scores for receiving  
34 FP/SAL. The propensity score calculation will be based upon a wide range of covariates (see  
35 statistical analysis section for full details). Where a participant is contributing more than one treated  
36 time period record to the pool of exposed records (as described in Step 4), baseline characteristics  
37 will be updated at the beginning of each treatment-eligible period. Multiple eligible treatment  
38 periods from a single person are then included in the propensity score model as if they came from  
39 different individuals. The variables selected for the score will then become the basis for propensity  
40 score modelling in Objectives 2 and 3.  
41  
42  
43  
44  
45  
46

#### 47 *Step 6*

48 Each untreated patient derived in Step 3 (n~6,000) will be matched 1:1 with the FP/SAL treated  
49 patient record from Step 4 with the closest propensity score (~12,000) giving us an analysis  
50 population for Objective 1 of ~12,000 patients – double the size of TORCH (Figure 1). For those  
51 individuals that have contributed multiple exposed records to the pool of CPRD exposed participants  
52 (Figure 2), after one of their exposed records has been propensity-score matched to an unexposed  
53 participant, we will remove all other exposed records for that individual from the remaining pool of  
54  
55  
56  
57  
58  
59  
60

1 CPRD exposed participants. This will mean that an individual can only appear once as an exposed  
2 participant in the final propensity-score matched cohort. The index date will be the start of follow  
3 up.  
4

5  
6 We will also apply an alternative additional approach for Objective 1, where instead of generating  
7 and using propensity scores to obtain a final analysis population at Steps 5 and 6, we will match  
8 records from our exposed TORCH-eligible cohort with participants from the TORCH trial to create a  
9 TORCH-analogous exposed patient cohort. This will then be combined with the TORCH-analogous  
10 unexposed patient cohort to create a final analysis population (with multivariable regression  
11 techniques used to account for confounding instead of propensity scores).  
12  
13  
14  
15

### 16 **Objective 2: Measurement of COPD treatment effects in patients excluded from trials**

17 We will include patients with a valid COPD diagnosis in the CPRD<sup>8</sup> meeting these additional criteria:  
18 (1) age >80 years OR (2) history of lung surgery OR (3) history of long term oxygen therapy OR (4)  
19 evidence of drug/alcohol abuse OR (5) substantial comorbidity. In relation to substantial  
20 comorbidity, TORCH required people to be excluded from the trial if they had serious uncontrolled  
21 disease with a likelihood of causing death within 3 years. It is likely this criterion affected participant  
22 selection and led to a lower overall rate of death than originally anticipated, although we recognise  
23 this criterion is subjective. During Objective 1 we will be able to select groups of people who were  
24 generally not included despite being eligible, most likely because of this subjective exclusion  
25 criterion. We anticipate this will be people with substantial comorbidity e.g. serious vascular disease.  
26 Status for such diseases is readily identified in both the CPRD data and in the TORCH baseline data.  
27 We will only be able to specify this criterion in detail after we have completed Objective 1.  
28  
29  
30  
31  
32  
33  
34  
35

### 36 **Objective 3: Determination of treatment effects in an under-studied disease stage**

37 We will include patients with a valid COPD diagnosis in the CPRD<sup>8</sup> meeting these additional criteria:  
38 (1) >60% predicted FEV1 (or >50% plus MRC breathlessness scale 1 or 2, or >50% plus COPD  
39 Assessment Test (CAT) score <10) AND a maximum of 1 exacerbation in the year post COPD  
40 diagnosis AND no evidence of asthma.  
41  
42  
43  
44  
45  
46  
47  
48  
49  
50  
51  
52  
53  
54  
55  
56  
57  
58  
59  
60

1 **Figure 1:** Flowchart illustrating the planned selection of CPRD participants for Objective 1 of  
2 the COPD real-world medicines effects study  
3

4 **[FIGURE 1 HERE]**  
5  
6  
7  
8  
9  
10  
11  
12  
13  
14  
15  
16  
17  
18  
19  
20  
21  
22  
23  
24  
25  
26  
27  
28  
29  
30  
31  
32  
33  
34  
35  
36  
37  
38  
39  
40  
41  
42  
43  
44  
45  
46  
47  
48  
49

For peer review only

50 **Note in relation to Step 5 (n~18,000) compared to Step 1 (n~13,000):** Approximately 90% of the treated patients will also  
51 have been eligible as untreated patients, as they did not receive FP/SAL on their TORCH-eligibility date. This means that  
52 they will have at least one period of time during which they are untreated-eligible) but then did subsequently go-on to  
53 receive FP/SAL (meaning they have at least one period of time during which they are treated-eligible). If a person is  
54 included as both a treated and untreated participant, they will be contributing different periods of their person-time to  
55 each cohort (pre-FP/SAL treatment for the untreated versus post-FP/SAL treatment for treated), and this is handled in the  
56 analysis by assigning different index dates.  
57  
58  
59  
60

1 **Figure 2:** Example timeline for a person in CPRD who is eligible for participation in Objective  
2 1, illustrating multiple periods of unexposed/exposed eligibility.  
3  
4  
5

6 [FIGURE 2 HERE]  
7  
8  
9  
10  
11  
12  
13  
14  
15  
16  
17  
18  
19  
20  
21  
22  
23  
24  
25  
26  
27  
28  
29  
30  
31  
32  
33  
34  
35  
36  
37  
38  
39

- 40  
41  
42  
43  
44  
45  
46  
47  
48  
49  
50  
51  
52  
53  
54  
55  
56  
57  
58  
59  
60
- 1. 1<sup>st</sup> date of study eligibility:** person meets TORCH eligibility as detailed in Objective 1, Step 1 on this date i.e. has a diagnosis of COPD, is between 0-80 years, FEV1<60% predicted and FEV1/FVC ratio <70%, smoking history, no asthma history, no lung surgery history, no long-term O<sub>2</sub> therapy, no alpha-1 antitrypsin deficiency, no drug/alcohol abuse, no exposure to FP/SAL within the previous 4 weeks.
  - 2. Eligible to enter study as an untreated participant:** patient can be selected as an untreated participant on any date within this period (as detailed in Step 2).
  - 3. Eligible to enter study as a treated participant:** FP/SAL treatment starts, patient is able to be selected as a treated study participant on the date that FP/SAL treatment starts (as detailed in Step 4).
  - 4. Eligible to enter study as an untreated participant:** patient stops treatment, but is not immediately eligible for selection again as an untreated study participant. After 4 weeks of no FP/SAL treatment however, they meet the TORCH eligibility criteria, and may be selected at any date during the remaining one untreated week as an untreated patient. This is the second untreated period that this person can contribute to the total pool of untreated period records that will be available for matching to the TORCH participants (as detailed in Steps 2 and 3).
  - 5. Eligible to enter study as a treated participant:** FP/SAL treatment (re)starts, patient can be selected as a treated study participant on the date that FP/SAL treatment (re)starts. This is the second treated period that this person can contribute to the total pool of treated period records that will be available for propensity score matching to the untreated participants (as detailed in Steps 4 to 6).

1  
2  
3  
4  
5  
6  
7  
8  
9  
10  
11  
12  
13  
14  
15  
16  
17  
18  
19  
20  
21  
22  
23  
24  
25  
26  
27  
28  
29  
30  
31  
32  
33  
34  
35  
36  
37  
38  
39  
40  
41  
42  
43  
44  
45  
46  
47  
48  
49  
50  
51  
52  
53  
54  
55  
56  
57  
58  
59  
60

For peer review only

## Exposures, outcomes and co-variates

### Exposures

For all objectives, exposures will be determined using CPRD prescribing records and code lists for COPD treatments (codelists provided in supplementary materials).

For Objective 1, incident use of FP/SAL (tradename Seretide) is the primary exposure of interest and will be compared with no treatment. We will limit included patients to those receiving Seretide 500/50, the dose used in TORCH. This information is recorded for all prescriptions of Seretide and this dose is the only currently approved dose for COPD in the UK (though we recognise some prescribing may not follow the licensed indication).

For Objectives 2 and 3 we will again use recorded prescribing information to determine the dose received. We will be reliant mostly on the strength of each individual drug which is recorded automatically against each product and does not require GPs to enter this data, ensuring completeness. We will then be able to stratify analyses based on the dose prescribed.

As a secondary analysis in Objective 1 other treatments for COPD will also be compared with no treatment in this objective. Namely:

- a) long-acting beta agonist (LABA)
- b) long-acting muscarinic antagonist (LAMA)
- c) LABA + LAMA
- d) LABA + inhaled corticosteroid (ICS) other than FP/SAL
- f) LABA + LAMA + ICS

For Objectives 2 and 3, exposures are as follows:

- a) No treatment
- b) LABA
- c) LAMA
- d) LABA + LAMA
- e) LABA + ICS
- f) LABA + LAMA + ICS

### Outcomes

Outcomes to be measured are as follows:

1. COPD exacerbation: to be defined using a CPRD-Hospital Episodes Statistics (HES) algorithm developed previously by authors of this study protocol<sup>10</sup>
2. All cause mortality: as recorded in ONS mortality statistics (data that is linked to CPRD data)
3. Pneumonia: as defined using a CPRD-HES algorithm published previously by authors of this study protocol<sup>9</sup>
4. Time to COPD treatment change: determined by prescribing records indicating the start of a new, additional COPD treatment



## Covariates

Covariates to be considered for inclusion in the propensity score include the following (all obtained from CPRD data):

- Lung function (FEV1, FEV1/FVC)
- Age
- Gender
- Body mass index
- Alcohol consumption
- Vascular disease (broken into individual components e.g. hypertension, heart failure, atherosclerotic disease)
- Use of prescribed aspirin and statins
- Prior treatment with other COPD medication
- Type 2 diabetes
- History of cancer
- Renal disease
- Healthcare utilisation intensity (number of prior visits, hospitalisations, number of distinct medications used, number of procedures)

## Sample size

Assuming a baseline conservative exacerbation rate of 0.5 per patient per year,<sup>10</sup> we would only require a sample of 408 patients per treatment group to detect a reduction in annual exacerbation rate to 0.4 per year, with 80% power and 5% significance. The estimated sample size is ~12,000 for each objective which will provide ample power for the main outcomes of interest, but also allow stratification by patient characteristics to determine stratified results, and will also be ample for the secondary analyses where we will use 99% confidence intervals. For example, to detect a reduction from 0.5 to 0.4 exacerbations per year with 80% power and 1% significance we would need ~600 people in each treatment group. We are also confident that we will have sufficient numbers to allow well powered analyses for Objectives 2 and 3. For example a feasibility count at the number of people over the age of 80 eligible for inclusion in Objective 2 estimated that there would be >2,000 people in each exposure group.

## Statistical analysis

### Propensity score for addressing confounding

The propensity score will be constructed using the principle that predictors of the exposure and outcome, or outcome only (mortality) should be included. We will consider a wide range of factors for inclusion, such as: age, sex, body mass index, alcohol consumption, and a wide range of comorbidities (e.g. type 2 diabetes, coronary heart disease, cerebrovascular disease, peripheral vascular disease, heart failure, hypertension, renal disease, cancer). We will further adjust for healthcare utilisation intensity (number of prior visits, hospitalisations, number of distinct

1 medications used, number of procedures, etc.) as these are generic correlates of disease state and  
2 the likelihood of recording completeness. We have substantial prior experience of building  
3 propensity models, and our study team includes the lead of an MRC funded project to determine  
4 optimal propensity score methods for use with missing data (EW).  
5  
6

7  
8 For Objective 1, every untreated patient will be PS matched 1:1 with an FP/SAL treated patient that  
9 has an FP/SAL treated period with the closest propensity score, resulting in a TORCH analogous  
10 cohort of FP/SAL treated and untreated CPRD patients (n~12,000). For the additional alternative  
11 approach to Objective 1 relying on matching of both unexposed and exposed patients to the TORCH  
12 trial patients (described in Selection of participants – Objective 1 – Step 6), we will use multivariable  
13 regression techniques to address confounding, considering a similar wide range of covariates for  
14 adjustment.  
15  
16  
17  
18

19 The propensity score model obtained in Objective 1 will be the basis for propensity score modelling  
20 in Objectives 2 and 3, but additional variables will also be considered given the different nature of  
21 the patient populations being studied in these Objectives.  
22  
23

#### 24 **Methods of analysis**

25  
26 Comparisons will be made according to FP/SAL status for rate of COPD exacerbation, pneumonia and  
27 mortality over 3 years. For exacerbations, a negative binomial model will be used, accounting for  
28 variability between patients in the number and frequency of exacerbations, with the number of  
29 exacerbations as the outcome and the log of treated time as an offset variable. Time to mortality  
30 and first pneumonia will be analysed using Cox proportional hazards regression. This mirrors TORCH  
31 endpoints of major benefit and harm. We anticipate the propensity matching process will allow us to  
32 assemble treated and untreated groups that are very similar with respect to baseline characteristics  
33 except FP/SAL treatment status. However, this will be tested by assessing standardised differences  
34 for each baseline variable. If substantial differences are noted for important variables, it may be  
35 necessary to further adjust the statistical models.<sup>11</sup>  
36  
37  
38  
39  
40  
41

#### 42 **Validation of results against TORCH**

43  
44 We will validate our findings against TORCH by determining whether results of the CPRD analysis are  
45 compatible with the TORCH rate ratio for exacerbations (0.75; 95% CI 0.69-0.81). This outcome has  
46 been selected as it is an outcome of key significance for people with COPD<sup>4</sup> and the result in TORCH  
47 shows a clear benefit with 95% confidence intervals below 1. We have set two criteria that must be  
48 met for us to conclude results are consistent. First the effect size must be clinically comparable with  
49 TORCH findings; the rate ratio for exacerbations in CPRD must be between 0.65 and 0.9. This range is  
50 deliberately not symmetrical around the TORCH estimate of 0.75 as we would anticipate the  
51 treatment effect in routine clinical care may be weaker than that seen in the optimised setting of a  
52  
53  
54  
55  
56  
57  
58  
59  
60

1 randomised trial. We recognise this rule could be met with a poorly powered, inconclusive result, so  
2 a second criterion is that the 95% confidence interval for the rate ratio must exclude 1.  
3

#### 4 **Handling measurement of adherence to medication**

5 Adherence to issued prescribing in general practice is likely to vary according to the treatment issued  
6 e.g. short course antibiotic treatment is notoriously not well adhered to, whereas long term life-  
7 saving treatment such as antiretroviral medication is more likely to be taken as prescribed. Whilst  
8 we do not have figures for adherence for COPD medication in UK general practice, we are able to  
9 estimate the proportion of time covered by prescribing as a proxy for adherence and will account for  
10 this in our analyses. Moreover, our intention is to estimate the effect of prescribing at the  
11 population level, and to some extent, the clinical effects we will measure are in part due to  
12 pharmacological effects, and in part the way the treatment is taken which includes adherence. Also  
13 of note, prescribing for COPD in the UK is predominantly through GPs and so we will not be missing  
14 prescribing information from other potential sources of treatment.  
15

16 The data analysis for adherence will necessarily be a significant element of the work to be done for  
17 this study. However, we have reviewed the records for a random sample of 30 people with COPD  
18 starting treatment with FP/SAL to look at adherence patterns over the course of a year. Of the 30  
19 patients, 20 (67%) were still receiving Seretide (FP/SAL) one year after starting treatment. Of the 20  
20 who received Seretide for a full year, 15 (75%) received sufficient prescriptions to suggest at least  
21 50% adherence over the year, and 8 (40%) had sufficient prescriptions to suggest 80% adherence or  
22 higher. As expected, this suggests two things: Firstly adherence is likely to be poorer in routine  
23 clinical care than in the trial population; in TORCH 80% of participants were estimated to have  
24 adherence at 80% or higher. Secondly there is a wide range of adherence in routine care. This will  
25 allow us to estimate both the population level effects of treatment as actually used in routine care,  
26 but also to estimate the treatment effect in patients with more similar levels of adherence to TORCH  
27 participants. Whilst we acknowledge that prescribing can only be a proxy for used medication, we  
28 believe it is not an unreasonable assumption that the amount of medication prescribed is correlated  
29 with the amount consumed. In the event that Objective 1 detects a null or poorer treatment effect  
30 than anticipated (rate ratio > 0.9), we will conduct a sensitivity analysis restricted to people  
31 estimated to be covered by FP/SAL treatment for 80% of their follow up.  
32

#### 33 **Missing data**

34 CPRD data are shown to be almost complete for drug prescribing and mortality (partly through ONS  
35 linkage). Smoking history tends to be very well recorded for people with COPD and missingness is  
36 likely to be minimal.<sup>10</sup> Information on important comorbidity is also well recorded in CPRD. We will  
37 conduct both complete record analyses and use multiple imputation where appropriate assumptions  
38  
39  
40  
41  
42  
43  
44  
45  
46  
47

1 hold, applying findings from methodological work led by one of the study team (EW) into the use of  
2 multiple imputation in propensity score modelling.<sup>14</sup>  
3

## 4 **Ethics and dissemination**

### 5 **Approval by ethics and scientific committees**

6  
7  
8 Ethical approval for this study has been obtained from the London School of Hygiene & Tropical  
9 Medicine Ethics Committee (Ref: 11997).  
10

11  
12  
13 An application for scientific approval related to use of the CPRD data has been made to the  
14 Independent Scientific Advisory Committee (ISAC) of the Medicines and Healthcare Products  
15 Regulatory Agency. CPRD data are already approved via a National Research Ethics Committee for  
16 purely observational research of this type.  
17  
18

19  
20 An application for use of the TORCH trial individual patient data was made to the  
21 clinicalstudydatarequest.com site, which is checked by the Wellcome Trust and relevant sponsors to  
22 make sure information is complete and that the sponsor's requirements for informed consent have  
23 been met. The application is then sent to an independent review panel that consider the scientific  
24 rationale, objectives, publication plan, conflicts of interest and qualifications and experience of the  
25 research team before making a decision on providing access to the data. We recently obtained  
26 approval of all aspects of this application.  
27  
28  
29  
30

### 31 **Dissemination plans**

32  
33  
34 Dissemination of findings will be via a combination of channels. The work will be published in high  
35 ranking peer reviewed journals and we anticipate 3 publications to arise directly from the planned  
36 work. Findings will also be presented at relevant scientific conferences such as the British Thoracic  
37 Society Conference and the European Respiratory Society International Congress. We will also  
38 engage with patients already identified from a clinic run by one of the authors of this protocol (JQ)  
39 and from Breathe Easy Groups and with relevant charities such as the British Lung Foundation to  
40 determine the most relevant ways to disseminate results directly to patients in an accessible  
41 manner, and to help our understanding of the likely impact of results to specific groups of patients.  
42 We will communicate directly with NICE to ensure they are kept informed of results that are of  
43 direct relevance to the guidance they have issued on COPD, and with the Medicines and Healthcare  
44 Products Regulatory Agency if it appears that findings may impact the risk/benefit profile of COPD  
45 treatments.  
46  
47  
48  
49  
50  
51  
52  
53  
54  
55  
56  
57  
58  
59  
60

## References

1. Comission H. Cleaning the air: a national study of chronic pulmonary disease. 2006.
2. Calverley PMA, Anderson JA, Celli B, Ferguson GT, Jenkins C, Jones PW, et al. Salmeterol and Fluticasone Propionate and Survival in Chronic Obstructive Pulmonary Disease. *N Engl J Med*. 2007 Feb 22;356(8):775–89.
3. Tashkin DP, Celli B, Senn S, Burkhart D, Kesten S, Menjoge S, et al. A 4-Year Trial of Tiotropium in Chronic Obstructive Pulmonary Disease. *N Engl J Med*. 2008 Oct 9;359(15):1543–54.
4. National Institute for Health and Care Excellence (NICE). Chronic obstructive pulmonary disease in over 16s: diagnosis and management | Guidance and guidelines | NICE. 2010;
5. Ferguson GT, Anzueto A, Fei R, Emmett A, Knobil K, Kalberg C, et al. Maintenance pharmacotherapy of mild and moderate COPD: what is the evidence? *Respir Med*. 2011 Sep;105(9):1268–74.
6. EU. REGULATION (EU) No 1235/2010 OF THE EUROPEAN PARLIAMENT AND OF THE COUNCIL. 2010.
7. Spring S. Guidance for Industry Postmarketing Studies and Clinical Trials — Implementation of Section 505(o)(3) of the Federal Food, Drug, and Cosmetic Act.
8. Herrett E, Gallagher AM, Bhaskaran K, Forbes H, Mathur R, Staa T van, et al. Data Resource Profile: Clinical Practice Research Datalink (CPRD). *Int J Epidemiol*. 2015 Jun;44(3):827–36.
9. Herrett E, Thomas SL, Schoonen WM, Smeeth L, Hall AJ. Validation and validity of diagnoses in the General Practice Research Database: a systematic review. *Br J Clin Pharmacol*. 2010 Jan;69(1):4–14.
10. Quint JK, Müllerova H, DiSantostefano RL, Forbes H, Eaton S, Hurst JR, et al. Validation of chronic obstructive pulmonary disease recording in the Clinical Practice Research Datalink (CPRD-GOLD). *BMJ Open*. 2014;4(7):e005540.
11. Millett ERC, Quint JK, Smeeth L, Daniel RM, Thomas SL. Incidence of Community-Acquired Lower Respiratory Tract Infections and Pneumonia among Older Adults in the United Kingdom: A Population-Based Study. Heimesaat MM, editor. *PLoS One*. 2013 Sep 11;8(9):e75131.
12. Rothnie KJ, Müllerová H, Hurst JR, Smeeth L, Davis K, Thomas SL, et al. Validation of the Recording of Acute Exacerbations of COPD in UK Primary Care Electronic Healthcare Records. Chotirmall SH, editor. *PLoS One*. 2016 Mar 9;11(3):e0151357.

- 1 13. Austin PC. An Introduction to Propensity Score Methods for Reducing the Effects of  
2 Confounding in Observational Studies. *Multivariate Behav Res.* 2011 May;46(3):399–424.  
3  
4 14. Leyrat C, Seaman SR, White IR, Douglas I, Smeeth L, Kim J, et al. Propensity score analysis  
5 with partially observed covariates: How should multiple imputation be used? *Stat Methods*  
6 *Med Res.* 2017 Jun 2;96228021771303.  
7  
8  
9  
10  
11  
12

## 13 **Authors contributions**

14 KW, EW, JC, LW, SS, LS, JQ, ID contributed to study question and design. KW wrote the first draft of  
15 the protocol manuscript (based upon original grant/scientific approval applications to NIHR and ISAC  
16 that KW, EW, JC, LW, SS, LS, JQ and ID all contributed to). KW, EW, JC, LW, SS, LS, JQ, ID contributed  
17 to further drafts and approved the final version.  
18  
19  
20  
21

## 22 **Acknowledgements**

23 No information for this section.  
24  
25  
26

## 27 **Data sharing statement**

28 There are currently no unpublished data from this study, as it is a protocol.  
29  
30

31 All of the data sources described can be accessed by making formal applications to the owners of the  
32 data (i.e. CPRD/HES data for the routinely collected observational data and [clinicalstudyrequest.com](http://clinicalstudyrequest.com)  
33 for the trial data used for validation of observational methods).  
34  
35  
36  
37  
38  
39  
40  
41  
42  
43  
44  
45  
46  
47  
48  
49  
50  
51  
52  
53  
54  
55  
56  
57  
58  
59  
60

FIGURE 1

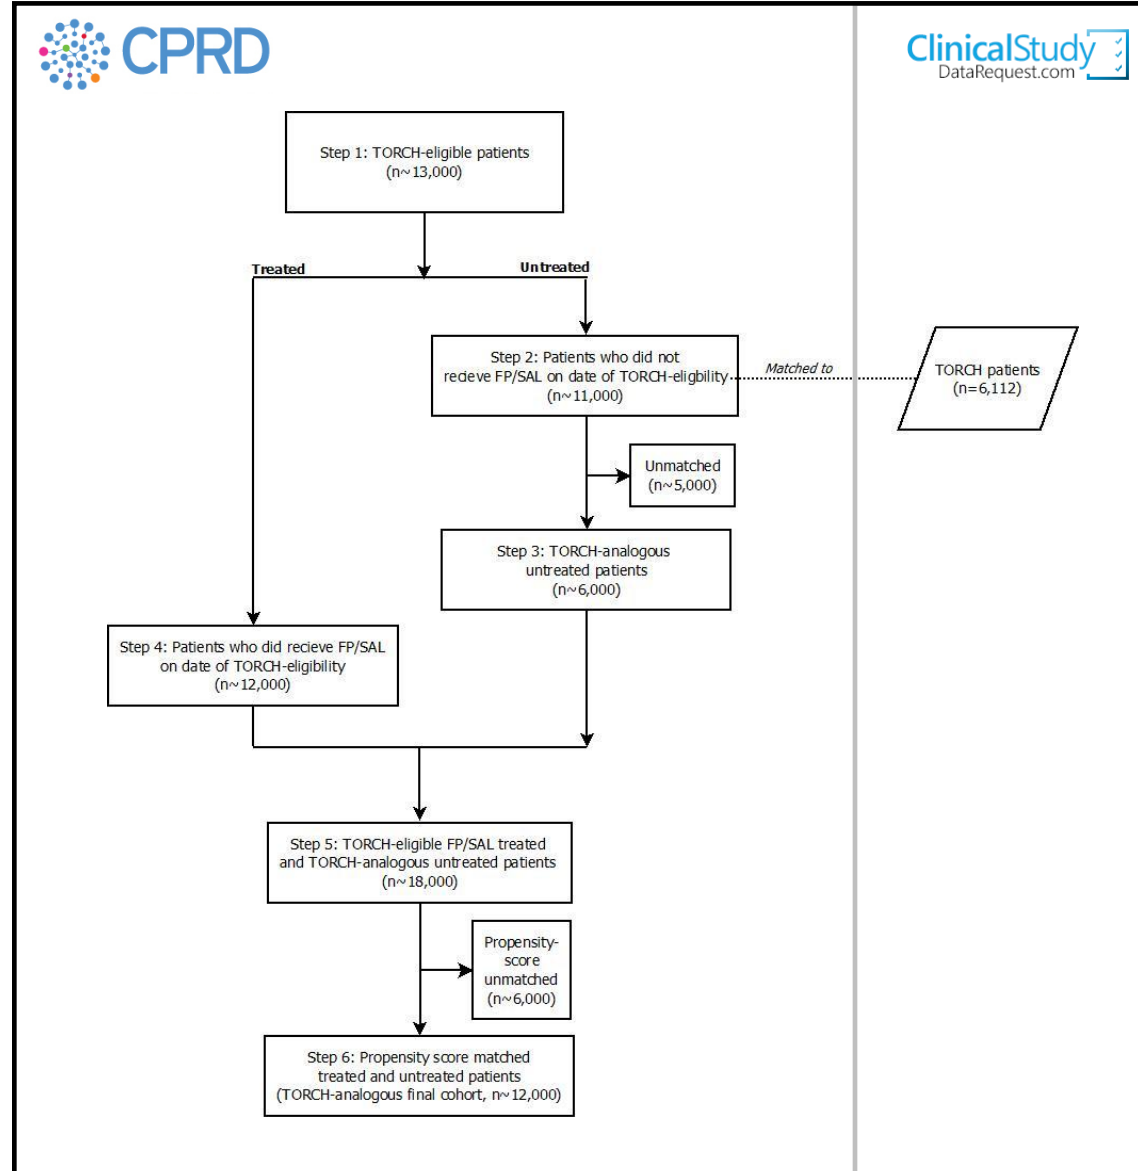

FIGURE 2

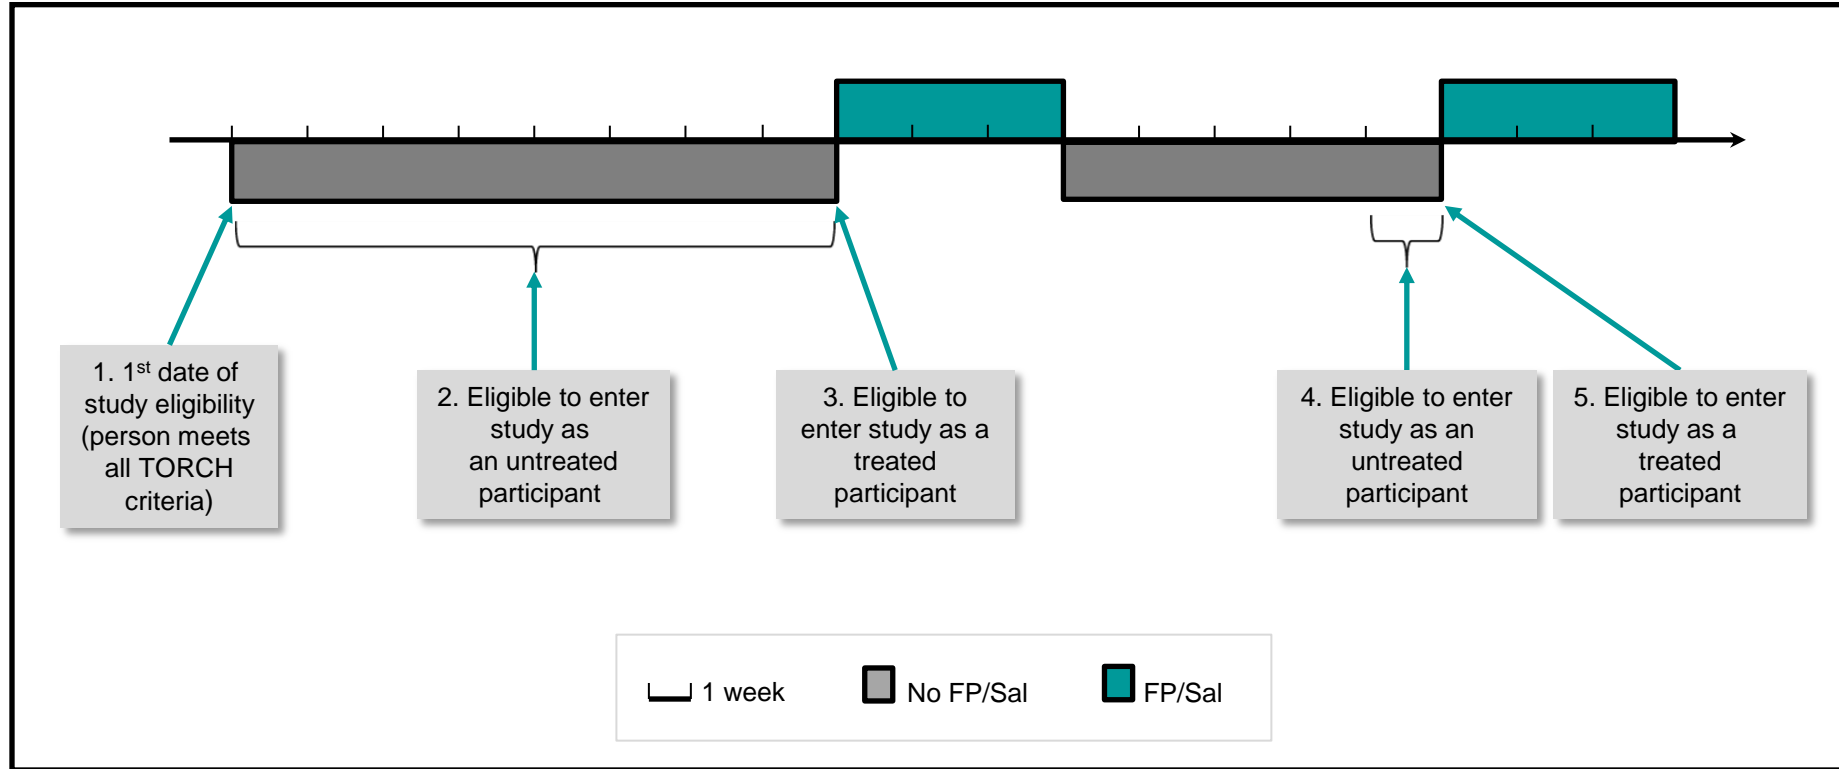

1  
2  
3  
4  
5  
6  
7  
8  
9  
10  
11  
12  
13  
14  
15  
16  
17  
18  
19  
20  
21  
22  
23  
24  
25  
26  
27  
28  
29  
30  
31  
32  
33  
34  
35  
36  
37  
38  
39  
40  
41



## LAMA codes

| Product code | BNF header                           | Drug substance                            | Drug product                                                                                           |
|--------------|--------------------------------------|-------------------------------------------|--------------------------------------------------------------------------------------------------------|
| 61176        | compound bronchodilator preparations | vilanterol trifenate/umeclidinium bromide | anoro ellipta 55micrograms/dose / 22micrograms/dose dry powder inhaler (glaxosmithkline uk ltd)        |
| 61490        | compound bronchodilator preparations |                                           | umeclidinium bromide 65micrograms/dose / vilanterol 22micrograms/dose dry powder inhaler               |
| 35014        | antimuscarinic bronchodilators       | tiotropium bromide monohydrate            | tiotropium bromide 18microgram inhalation powder capsules with device                                  |
| 6474         | antimuscarinics                      | glycopyrronium bromide                    | robinul 1mg tablet (idis world medicines)                                                              |
| 50577        | antimuscarinic bronchodilators       | tiotropium bromide                        | spiriva 18microgram inhalation powder capsules with handihaler (de pharmaceuticals)                    |
| 35011        | antimuscarinic bronchodilators       | tiotropium bromide monohydrate            | tiotropium bromide 18microgram inhalation powder capsules                                              |
| 49227        | antimuscarinic bronchodilators       |                                           | aclidinium bromide 375micrograms/dose dry powder inhaler                                               |
| 50103        | antimuscarinic bronchodilators       |                                           | spiriva 18microgram inhalation powder capsules with handihaler (waymade healthcare plc)                |
| 7908         | antimuscarinics                      | glycopyrronium bromide                    | robinul 2mg tablet (wyeth pharmaceuticals)                                                             |
| 59638        | antimuscarinic bronchodilators       |                                           | spiriva 18microgram inhalation powder capsules with handihaler (sigma pharmaceuticals plc)             |
| 51967        | antimuscarinic bronchodilators       | tiotropium bromide                        | spiriva 18microgram inhalation powder capsules (mawdsley-brooks & company ltd)                         |
| 53982        | antimuscarinic bronchodilators       |                                           | seebri breezhaler 44microgram inhalation powder capsules with device (novartis pharmaceuticals uk ltd) |
| 6050         | antimuscarinic bronchodilators       | tiotropium bromide                        | spiriva 18 microgram capsule (boehringer ingelheim ltd)                                                |
| 7597         | other ulcer healing drugs            | glycopyrronium bromide                    | glycopyrronium bromide 2mg tablets                                                                     |
| 49228        | antimuscarinic bronchodilators       |                                           | eklira 322micrograms/dose genuair (almirall ltd)                                                       |
| 59173        | other ulcer healing drugs            | glycopyrronium bromide                    | glycopyrronium bromide 200micrograms/5ml oral suspension                                               |
| 36864        | antimuscarinic bronchodilators       | tiotropium bromide                        | tiotropium bromide 2.5micrograms/dose solution for inhalation cartridge with device cfc free           |
| 55911        | other ulcer healing drugs            | glycopyrronium bromide                    | glycopyrronium bromide 500micrograms/5ml oral solution                                                 |

| Product code | BNF header                     | Drug substance         | Drug product                                                                                                 |
|--------------|--------------------------------|------------------------|--------------------------------------------------------------------------------------------------------------|
| 34995        | antimuscarinic bronchodilators | tiotropium bromide     | spiriva 18microgram inhalation powder capsules with handihaler (boehringer ingelheim ltd)                    |
| 35000        | antimuscarinic bronchodilators | tiotropium bromide     | spiriva 18microgram inhalation powder capsules (boehringer ingelheim ltd)                                    |
| 29138        | other ulcer healing drugs      | glycopyrronium bromide | glycopyrronium bromide 1mg/5ml oral solution                                                                 |
| 47269        | other ulcer healing drugs      | glycopyrronium bromide | glycopyrronium bromide 1mg/5ml oral suspension                                                               |
| 54151        | other ulcer healing drugs      | glycopyrronium bromide | glycopyrronium bromide 600micrograms/5ml oral suspension                                                     |
| 55795        | other ulcer healing drugs      | glycopyrronium bromide | glycopyrronium bromide 500micrograms/5ml oral suspension                                                     |
| 38377        | other ulcer healing drugs      | glycopyrronium bromide | glycopyrronium bromide 2mg/5ml oral solution                                                                 |
| 7218         | other ulcer healing drugs      | glycopyrronium bromide | glycopyrronium bromide 1mg tablets                                                                           |
| 36869        | antimuscarinic bronchodilators | tiotropium bromide     | spiriva respimat 2.5micrograms/dose solution for inhalation cartridge with device (boehringer ingelheim ltd) |
| 62109        | antimuscarinic bronchodilators |                        | umeclidinium bromide 65micrograms/dose dry powder inhaler                                                    |
| 50292        | antimuscarinic bronchodilators |                        | spiriva 18microgram inhalation powder capsules (sigma pharmaceuticals plc)                                   |
| 55794        | other ulcer healing drugs      | glycopyrronium bromide | glycopyrronium bromide 5mg/5ml oral suspension                                                               |
| 50047        | other ulcer healing drugs      | glycopyrronium bromide | glycopyrronium bromide 5mg/5ml oral solution                                                                 |
| 56262        | other ulcer healing drugs      | glycopyrronium bromide | glycopyrronium bromide 200micrograms/5ml oral solution                                                       |
| 61879        | antimuscarinic bronchodilators |                        | incruise ellipta 55micrograms/dose dry powder inhaler (glaxosmithkline uk ltd)                               |
| 53761        | antimuscarinic bronchodilators |                        | glycopyrronium bromide 55microgram inhalation powder capsules with device                                    |
| 746          | antimuscarinic bronchodilators | tiotropium bromide     | tiotropium 18 microgram capsule                                                                              |
| 38538        | other ulcer healing drugs      | glycopyrronium bromide | glycopyrronium bromide 2mg/5ml oral suspension                                                               |
| 46214        | antimuscarinics                | glycopyrronium bromide | glycopyrronium bromide 5mg/5ml oral solution                                                                 |
| 61582        | antimuscarinic bronchodilators | tiotropium bromide     | spiriva respimat 2.5micrograms/dose solution for inhalation cartridge with device (waymade healthcare plc)   |

## LABA codes

| Product code | BNF header                                | Drug substance                | Drug product                                                                                            |
|--------------|-------------------------------------------|-------------------------------|---------------------------------------------------------------------------------------------------------|
| 45610        | selective beta 2 agonists                 | indacaterol maleate           | indacaterol 300microgram inhalation powder capsules with device                                         |
| 7270         | selective beta 2 agonists                 | salmeterol xinafoate          | salmeterol 25micrograms/dose inhaler cfc free                                                           |
| 10968        | selective beta 2 agonists                 | formoterol fumarate dihydrate | foradil 12microgram inhalation powder capsules with device (novartis pharmaceuticals uk ltd)            |
| 549          | unknown                                   | salmeterol xinafoate          | serevent 25micrograms/dose inhaler (glaxosmithkline uk ltd)                                             |
| 7133         | selective beta 2 agonists                 | formoterol fumarate dihydrate | formoterol 12micrograms/dose dry powder inhaler                                                         |
| 54742        | selective beta 2 agonists                 | salmeterol xinafoate          | salmeterol 25micrograms/dose inhaler cfc free (a a h pharmaceuticals ltd)                               |
| 719          | selective beta 2 agonists                 | salmeterol xinafoate          | salmeterol 50micrograms/dose dry powder inhaler                                                         |
| 57694        | selective beta 2 agonists                 | salmeterol xinafoate          | vertine 25micrograms/dose inhaler cfc free (teva uk ltd)                                                |
| 26829        | selective beta 2 agonists                 | tulobuterol                   | brelomax 2mg tablet (abbott laboratories ltd)                                                           |
| 19799        | selective beta 2 agonists                 | tulobuterol                   | tulobuterol 2mg                                                                                         |
| 56482        | selective beta 2 agonists                 | formoterol fumarate dihydrate | oxis 12 turbohaler (waymade healthcare plc)                                                             |
| 25784        | selective beta 2 agonists                 | formoterol fumarate dihydrate | atimos modulite 12micrograms/dose inhaler (chiesi ltd)                                                  |
| 47638        | selective beta 2 agonists                 | salmeterol xinafoate          | neovent 25micrograms/dose inhaler cfc free (kent pharmaceuticals ltd)                                   |
| 10672        | peripheral vasodilators and related drugs | moxisylyte hydrochloride      | opilon 40mg tablet (concord pharmaceuticals ltd)                                                        |
| 50051        | selective beta 2 agonists                 | salmeterol xinafoate          | serevent 25micrograms/dose evohaler (waymade healthcare plc)                                            |
| 35725        | selective beta 2 agonists                 | formoterol fumarate dihydrate | formoterol easyhaler 12micrograms/dose dry powder inhaler (orion pharma (uk) ltd)                       |
| 2224         | selective beta 2 agonists                 | salmeterol xinafoate          | serevent 50micrograms/dose accuhaler (glaxosmithkline uk ltd)                                           |
| 43893        | selective beta 2 agonists                 | indacaterol maleate           | onbrez breezhaler 150microgram inhalation powder capsules with device (novartis pharmaceuticals uk ltd) |
| 6526         | selective beta 2 agonists                 | formoterol fumarate dihydrate | formoterol 12microgram inhalation powder capsules with device                                           |
| 43738        | selective beta 2 agonists                 | indacaterol maleate           | indacaterol 150microgram inhalation powder capsules with device                                         |

| Product code | BNF header                                | Drug substance                | Drug product                                                                                            |
|--------------|-------------------------------------------|-------------------------------|---------------------------------------------------------------------------------------------------------|
| 35825        | selective beta 2 agonists                 | salmeterol xinafoate          | serevent 50microgram disks (glaxosmithkline uk ltd)                                                     |
| 43764        | peripheral vasodilators and related drugs | moxisylyte hydrochloride      | opilon 40mg tablets (archimedes pharma uk ltd)                                                          |
| 56478        | selective beta 2 agonists                 | salmeterol xinafoate          | serevent 50micrograms/dose accuhaler (de pharmaceuticals)                                               |
| 42103        | selective beta 2 agonists                 | tulobuterol                   | tulobuterol 1mg/5ml sugar free syrup                                                                    |
| 57544        | selective beta 2 agonists                 | salmeterol xinafoate          | serevent 50micrograms/dose accuhaler (waymade healthcare plc)                                           |
| 3297         | selective beta 2 agonists                 | salmeterol xinafoate          | salmeterol 50micrograms disc                                                                            |
| 57558        | selective beta 2 agonists                 | formoterol fumarate dihydrate | oxis 6 turbohaler (lexon (uk) ltd)                                                                      |
| 9711         | selective beta 2 agonists                 | formoterol fumarate dihydrate | formoterol 6micrograms/dose dry powder inhaler                                                          |
| 35542        | selective beta 2 agonists                 | salmeterol xinafoate          | salmeterol 50microgram inhalation powder blisters with device                                           |
| 465          | unknown                                   | salmeterol xinafoate          | salmeterol 25micrograms/dose inhaler                                                                    |
| 44064        | selective beta 2 agonists                 | indacaterol maleate           | onbrez breezhaler 300microgram inhalation powder capsules with device (novartis pharmaceuticals uk ltd) |
| 35165        | selective beta 2 agonists                 | salmeterol xinafoate          | serevent 50microgram disks with diskhaler (glaxosmithkline uk ltd)                                      |
| 14306        | selective beta 2 agonists                 | formoterol fumarate dihydrate | formoterol 12micrograms/dose inhaler cfc free                                                           |
| 1974         | selective beta 2 agonists                 | formoterol fumarate dihydrate | oxis 12 turbohaler (astrazeneca uk ltd)                                                                 |
| 7268         | selective beta 2 agonists                 | salmeterol xinafoate          | serevent 25micrograms/dose evohaler (glaxosmithkline uk ltd)                                            |
| 8365         | peripheral vasodilators and related drugs | moxisylyte hydrochloride      | moxisylyte 40mg tablets                                                                                 |
| 35503        | selective beta 2 agonists                 | salmeterol xinafoate          | salmeterol 50microgram inhalation powder blisters                                                       |
| 1975         | selective beta 2 agonists                 | formoterol fumarate dihydrate | oxis 6 turbohaler (astrazeneca uk ltd)                                                                  |
| 22663        | selective beta 2 agonists                 | tulobuterol                   | respacal 2mg tablet (ucb pharma ltd)                                                                    |
| 910          | selective beta 2 agonists                 | salmeterol xinafoate          | serevent diskhaler 50microgram inhalation powder (glaxo wellcome uk ltd)                                |

## ICS codes

| Product code | BNF header                                   | Drug substance             | Drug product                                                                     |
|--------------|----------------------------------------------|----------------------------|----------------------------------------------------------------------------------|
| 54399        | corticosteroids (for respiratory conditions) | beclometasone dipropionate | qvar 100 autohaler (sigma pharmaceuticals plc)                                   |
| 959          | unknown                                      | budesonide                 | budesonide 50micrograms/dose inhaler                                             |
| 2951         | corticosteroids (for respiratory conditions) | fluticasone propionate     | fluticasone 250microgram/actuation pressurised inhalation                        |
| 50129        | corticosteroids (for respiratory conditions) | beclometasone dipropionate | qvar 100micrograms/dose easi-breathe inhaler (de pharmaceuticals)                |
| 2229         | corticosteroids (for respiratory conditions) | beclometasone dipropionate | becodisks 100microgram disc (allen & hanburys ltd)                               |
| 3989         | corticosteroids (for respiratory conditions) | fluticasone propionate     | flixiotide 100microgram disc (allen & hanburys ltd)                              |
| 5551         | corticosteroids (for respiratory conditions) | fluticasone propionate     | flixiotide 0.5mg/2ml nebulas (glaxosmithkline uk ltd)                            |
| 34794        | corticosteroids (for respiratory conditions) | beclometasone dipropionate | beclometasone 200micrograms/dose inhaler (a a h pharmaceuticals ltd)             |
| 41269        | corticosteroids (for respiratory conditions) | beclometasone dipropionate | beclometasone 400 cyclocaps (teva uk ltd)                                        |
| 29325        | corticosteroids (for respiratory conditions) | beclometasone dipropionate | beclometasone 250micrograms/dose inhaler (generics (uk) ltd)                     |
| 4499         | corticosteroids (for respiratory conditions) | beclometasone dipropionate | aerobec 250microgram/actuation pressurised inhalation (meda pharmaceuticals ltd) |
| 57589        | corticosteroids (for respiratory conditions) | beclometasone dipropionate | becloforte 250micrograms/dose inhaler (dowelhurst ltd)                           |
| 32874        | corticosteroids (for respiratory conditions) | beclometasone dipropionate | beclometasone 50microgram/actuation inhalation powder (actavis uk ltd)           |
| 2159         | corticosteroids (for respiratory conditions) | beclometasone dipropionate | aerobec 50 autohaler (meda pharmaceuticals ltd)                                  |
| 14590        | corticosteroids (for respiratory conditions) | beclometasone dipropionate | asmabec 250microgram/actuation spacehaler (celltech pharma europe ltd)           |
| 1725         | corticosteroids (for respiratory conditions) | beclometasone dipropionate | beclazone 50 easi-breathe inhaler (teva uk ltd)                                  |
| 908          | corticosteroids (for respiratory conditions) | budesonide                 | pulmicort 400 turbohaler (astrazeneca uk ltd)                                    |
| 35288        | corticosteroids (for respiratory conditions) | beclometasone dipropionate | beclometasone 400microgram inhalation powder blisters                            |
| 49367        | corticosteroids (for respiratory conditions) | beclometasone dipropionate | clenil modulite 50micrograms/dose inhaler (mawdsley-brooks & company ltd)        |
| 35107        | corticosteroids (for respiratory conditions) | beclometasone dipropionate | beclometasone 400microgram inhalation powder blisters with device                |
| 1676         | corticosteroids (for respiratory conditions) | fluticasone propionate     | flixiotide 125microgram/actuation inhalation powder                              |

| Product code | BNF header                                   | Drug substance             | Drug product                                                                            |
|--------------|----------------------------------------------|----------------------------|-----------------------------------------------------------------------------------------|
|              |                                              |                            | (allen & hanburys ltd)                                                                  |
| 49772        | corticosteroids (for respiratory conditions) | fluticasone propionate     | fluticasone 250micrograms/dose evohaler (sigma pharmaceuticals plc)                     |
| 48088        | unknown                                      | budesonide                 | budenofalk 9mg gastro-resistant granules sachets (dr. falk pharma uk ltd)               |
| 33258        | corticosteroids (for respiratory conditions) | beclometasone dipropionate | beclometasone 250micrograms/dose inhaler (a a h pharmaceuticals ltd)                    |
| 13037        | corticosteroids (for respiratory conditions) | beclometasone dipropionate | pulvinal beclometasone dipropionate 200micrograms/dose dry powder inhaler (chiesi ltd)  |
| 19031        | corticosteroids (for respiratory conditions) | beclometasone dipropionate | bdp 100microgram/actuation spacehaler (celltech pharma europe ltd)                      |
| 16158        | corticosteroids (for respiratory conditions) | beclometasone dipropionate | clenil modulite 50micrograms/dose inhaler (chiesi ltd)                                  |
| 2124         | unknown                                      |                            | pulmicort refil 200 mcg inh                                                             |
| 4759         | corticosteroids (for respiratory conditions) | beclometasone dipropionate | beclometasone 100microgram inhalation powder capsules                                   |
| 3753         | unknown                                      |                            | flioxotide diskhaler-community pack 250 mcg                                             |
| 49711        | corticosteroids (for respiratory conditions) | budesonide                 | pulmicort 200micrograms/dose inhaler (astrazeneca uk ltd)                               |
| 15326        | corticosteroids (for respiratory conditions) | beclometasone dipropionate | beclometasone 100micrograms/dose inhaler cfc free                                       |
| 2335         | corticosteroids (for respiratory conditions) | beclometasone dipropionate | qvar 100 inhaler (teva uk ltd)                                                          |
| 5580         | corticosteroids (for respiratory conditions) | fluticasone propionate     | flioxotide accuhaler 50 50microgram/inhalation inhalation powder (allen & hanburys ltd) |
| 51681        | corticosteroids (for respiratory conditions) | beclometasone dipropionate | qvar 100 inhaler (sigma pharmaceuticals plc)                                            |
| 8433         | corticosteroids (for respiratory conditions) | budesonide                 | budesonide 100micrograms/actuation inhaler                                              |
| 9577         | corticosteroids (for respiratory conditions) | beclometasone dipropionate | asmabec 50 clickhaler (focus pharmaceuticals ltd)                                       |
| 2723         | corticosteroids (for respiratory conditions) | fluticasone propionate     | fluticasone 25micrograms/dose inhaler                                                   |
| 23675        | unknown                                      |                            | pulmicort i.s. refil                                                                    |
| 35638        | corticosteroids (for respiratory conditions) | fluticasone propionate     | fluticasone propionate 100microgram inhalation powder blisters with device              |
| 9571         | corticosteroids (for respiratory conditions) | beclometasone dipropionate | beclometasone 250micrograms/actuation vortex inhaler                                    |
| 51234        | corticosteroids (for respiratory conditions) | beclometasone dipropionate | qvar 100 inhaler (waymade healthcare plc)                                               |
| 60946        | corticosteroids (in chronic bowel disorders) | budesonide                 | entocort cr 3mg capsules (waymade healthcare plc)                                       |

| Product code | BNF header                                   | Drug substance             | Drug product                                                                           |
|--------------|----------------------------------------------|----------------------------|----------------------------------------------------------------------------------------|
| 5223         | corticosteroids (for respiratory conditions) | fluticasone propionate     | fluticasone 50micrograms/dose inhaler cfc free                                         |
| 53057        | corticosteroids (for respiratory conditions) | fluticasone propionate     | flixtotide 50micrograms/dose evohaler (lexon (uk) ltd)                                 |
| 13290        | corticosteroids (for respiratory conditions) | beclometasone dipropionate | clenil modulite 100micrograms/dose inhaler (chiesi ltd)                                |
| 42928        | corticosteroids (for respiratory conditions) | fluticasone propionate     | flixtotide 100micrograms/dose accuhaler (glaxosmithkline uk ltd)                       |
| 14736        | corticosteroids (for respiratory conditions) | beclometasone dipropionate | pulvinal beclometasone dipropionate 400micrograms/dose dry powder inhaler (chiesi ltd) |
| 52806        | corticosteroids (for respiratory conditions) | beclometasone dipropionate | qvar 100 autohaler (lexon (uk) ltd)                                                    |
| 57525        | corticosteroids (for respiratory conditions) | fluticasone propionate     | flixtotide 250micrograms/dose accuhaler (stephar (u.k.) ltd)                           |
| 33849        | corticosteroids (for respiratory conditions) | beclometasone dipropionate | beclometasone 100microgram/actuation inhalation powder (neo laboratories ltd)          |
| 52732        | corticosteroids (for respiratory conditions) | budesonide                 | pulmicort 0.5mg respules (necessity supplies ltd)                                      |
| 35611        | corticosteroids (for respiratory conditions) | fluticasone propionate     | flixtotide 250microgram disks (glaxosmithkline uk ltd)                                 |
| 8111         | corticosteroids (for respiratory conditions) | beclometasone dipropionate | becloforte vm 250microgram/actuation vm pack (allen & hanburys ltd)                    |
| 39879        | unknown                                      | budesonide                 | budesonide 200micrograms/dose inhaler cfc free                                         |
| 1242         | corticosteroids (for respiratory conditions) | beclometasone dipropionate | beclometasone 250micrograms/dose inhaler                                               |
| 26665        | unknown                                      |                            | pulmicort complete                                                                     |
| 37447        | corticosteroids (for respiratory conditions) | fluticasone propionate     | fluticasone propionate 50microgram inhalation powder blisters                          |
| 5718         | corticosteroids (for respiratory conditions) | fluticasone propionate     | flixtotide 125micrograms/dose evohaler (glaxosmithkline uk ltd)                        |
| 7653         | corticosteroids (for respiratory conditions) | beclometasone dipropionate | beclometasone 400microgram inhalation powder capsules                                  |
| 28640        | corticosteroids (for respiratory conditions) | beclometasone dipropionate | beclometasone 100microgram/actuation inhalation powder (actavis uk ltd)                |
| 4365         | corticosteroids (for respiratory conditions) | beclometasone dipropionate | beclometasone 100micrograms disc                                                       |
| 34739        | corticosteroids (for respiratory conditions) | beclometasone dipropionate | beclometasone 50micrograms/dose inhaler (teva uk ltd)                                  |
| 8635         | corticosteroids (for respiratory conditions) | fluticasone propionate     | flixtotide 50microgram disc (allen & hanburys ltd)                                     |
| 57579        | corticosteroids (for respiratory conditions) | fluticasone propionate     | flixtotide 50micrograms/dose accuhaler (de pharmaceuticals)                            |
| 4413         | corticosteroids (for respiratory conditions) | beclometasone dipropionate | qvar 100 autohaler (teva uk ltd)                                                       |

| Product code | BNF header                                   | Drug substance             | Drug product                                                                       |
|--------------|----------------------------------------------|----------------------------|------------------------------------------------------------------------------------|
| 37203        | corticosteroids (in chronic bowel disorders) | beclometasone dipropionate | beclometasone 5mg gastro-resistant modified-release tablets                        |
| 4132         | corticosteroids (for respiratory conditions) | fluticasone propionate     | fluticasone 125microgram/actuation pressurised inhalation                          |
| 3018         | corticosteroids (for respiratory conditions) | beclometasone dipropionate | beclometasone 50micrograms/dose inhaler                                            |
| 9233         | corticosteroids (for respiratory conditions) | beclometasone dipropionate | beclometasone 200microgram inhalation powder capsules                              |
| 2160         | corticosteroids (for respiratory conditions) | beclometasone dipropionate | beclometasone 50micrograms/dose breath actuated inhaler                            |
| 2148         | corticosteroids (for respiratory conditions) | beclometasone dipropionate | beclometasone 400microgram disc                                                    |
| 34919        | corticosteroids (for respiratory conditions) | beclometasone dipropionate | beclometasone 50micrograms/dose inhaler (a a h pharmaceuticals ltd)                |
| 2092         | corticosteroids (for respiratory conditions) | budesonide                 | budesonide 200micrograms/dose dry powder inhaler                                   |
| 21005        | corticosteroids (for respiratory conditions) | beclometasone dipropionate | beclometasone 250micrograms/dose inhaler cfc free                                  |
| 10090        | corticosteroids (for respiratory conditions) | beclometasone dipropionate | beclometasone 50micrograms/actuation extrafine particle cfc free inhaler           |
| 1551         | corticosteroids (for respiratory conditions) | beclometasone dipropionate | beclazone 250 inhaler (teva uk ltd)                                                |
| 39067        | corticosteroids (in chronic bowel disorders) | beclometasone dipropionate | clipper 5mg gastro-resistant modified-release tablets (chiesi ltd)                 |
| 51415        | corticosteroids (for respiratory conditions) | beclometasone dipropionate | qvar 50 inhaler (mawdsley-brooks & company ltd)                                    |
| 35106        | corticosteroids (for respiratory conditions) | beclometasone dipropionate | becodisks 100microgram with diskhaler (glaxosmithkline uk ltd)                     |
| 35299        | corticosteroids (for respiratory conditions) | beclometasone dipropionate | becodisks 400microgram (glaxosmithkline uk ltd)                                    |
| 54207        | corticosteroids (for respiratory conditions) | beclometasone dipropionate | qvar 50 inhaler (de pharmaceuticals)                                               |
| 3927         | corticosteroids (for respiratory conditions) | beclometasone dipropionate | filair 100 inhaler (meda pharmaceuticals ltd)                                      |
| 17670        | corticosteroids (for respiratory conditions) | budesonide                 | easyhaler budesonide 100micrograms/dose dry powder inhaler (orion pharma (uk) ltd) |
| 883          | corticosteroids (for respiratory conditions) | beclometasone dipropionate | becodisks 200microgram disc (allen & hanburys ltd)                                 |
| 8450         | unknown                                      |                            | flixtotide diskhaler-community pack 50 mcg                                         |
| 3289         | corticosteroids (for respiratory conditions) | fluticasone propionate     | flixtotide 25micrograms/dose inhaler (glaxosmithkline uk ltd)                      |
| 53480        | corticosteroids (for respiratory conditions) | beclometasone dipropionate | qvar 100 autohaler (stephar (u.k.) ltd)                                            |
| 39102        | unknown                                      | budesonide                 | budesonide 100micrograms/dose inhaler cfc free                                     |
| 20763        | unknown                                      |                            | becloforte                                                                         |



| Product code | BNF header                                   | Drug substance             | Drug product                                                                                              |
|--------------|----------------------------------------------|----------------------------|-----------------------------------------------------------------------------------------------------------|
| 35374        | corticosteroids (for respiratory conditions) | fluticasone propionate     | flixtide 500microgram disks (glaxosmithkline uk ltd)                                                      |
| 39200        | corticosteroids (for respiratory conditions) | beclometasone dipropionate | aerobec forte 250 autohaler (meda pharmaceuticals ltd)                                                    |
| 9599         | corticosteroids (for respiratory conditions) | beclometasone dipropionate | beclazone 50microgram/actuation inhalation powder (actavis uk ltd)                                        |
| 5804         | corticosteroids (for respiratory conditions) | beclometasone dipropionate | beclometasone 250micrograms/dose dry powder inhaler                                                       |
| 47943        | corticosteroids (for respiratory conditions) | beclometasone dipropionate | beclazone easi-breathe (roi) 100microgram/actuation pressurised inhalation (ivax pharmaceuticals ireland) |
| 5683         | corticosteroids (for respiratory conditions) | fluticasone propionate     | flixtide 250micrograms/dose evohaler (glaxosmithkline uk ltd)                                             |
| 48340        | corticosteroids (for respiratory conditions) | beclometasone dipropionate | clenil modulite 100micrograms/dose inhaler (mawdsley-brooks & company ltd)                                |
| 1885         | corticosteroids (for respiratory conditions) | beclometasone dipropionate | beclazone 200 inhaler (teva uk ltd)                                                                       |
| 911          | corticosteroids (for respiratory conditions) | fluticasone propionate     | flixtide accuhaler 250 250microgram/inhalation inhalation powder (allen & hanburys ltd)                   |
| 6095         | corticosteroids (in chronic bowel disorders) | budesonide                 | budesonide 3mg gastro-resistant capsules                                                                  |
| 28073        | corticosteroids (for respiratory conditions) | beclometasone dipropionate | beclometasone 250microgram/actuation pressurised inhalation (approved prescription services ltd)          |
| 4131         | corticosteroids (for respiratory conditions) | fluticasone propionate     | fluticasone 100microgram disc                                                                             |
| 43074        | corticosteroids (for respiratory conditions) | fluticasone propionate     | flixtide 500micrograms/dose accuhaler (glaxosmithkline uk ltd)                                            |
| 35905        | corticosteroids (for respiratory conditions) | fluticasone propionate     | fluticasone propionate 250microgram inhalation powder blisters                                            |
| 27583        | unknown                                      |                            | pulmicort                                                                                                 |
| 17654        | corticosteroids (for respiratory conditions) | beclometasone dipropionate | easyhaler beclometasone 200micrograms/dose dry powder inhaler (orion pharma (uk) ltd)                     |
| 4545         | corticosteroids (for respiratory conditions) | budesonide                 | pulmicort ls 50microgram refill canister (astrazeneca uk ltd)                                             |
| 1412         | corticosteroids (for respiratory conditions) | fluticasone propionate     | flixtide 250microgram/actuation inhalation powder (allen & hanburys ltd)                                  |
| 3363         | corticosteroids (for respiratory conditions) | beclometasone dipropionate | becloforte 400microgram disks with diskhaler (glaxosmithkline uk ltd)                                     |
| 36462        | corticosteroids (for respiratory conditions) | fluticasone propionate     | fluticasone propionate 500microgram inhalation                                                            |

| Product code | BNF header                                   | Drug substance             | Drug product                                                                              |
|--------------|----------------------------------------------|----------------------------|-------------------------------------------------------------------------------------------|
|              |                                              |                            | powder blisters                                                                           |
| 56471        | corticosteroids (for respiratory conditions) | beclometasone dipropionate | becodisks 200microgram (mawdsley-brooks & company ltd)                                    |
| 14294        | corticosteroids (for respiratory conditions) | beclometasone dipropionate | qvar 50micrograms/dose easi-breathe inhaler (teva uk ltd)                                 |
| 3570         | corticosteroids (for respiratory conditions) | budesonide                 | budesonide 200micrograms/actuation refill canister                                        |
| 9164         | corticosteroids (for respiratory conditions) | fluticasone propionate     | fluticasone propionate 50micrograms/dose dry powder inhaler                               |
| 27188        | corticosteroids (for respiratory conditions) | budesonide                 | easyhaler budesonide 200micrograms/dose dry powder inhaler (orion pharma (uk) ltd)        |
| 39099        | unknown                                      | budesonide                 | pulmicort 100micrograms/dose inhaler cfc free (astrazeneca uk ltd)                        |
| 4926         | corticosteroids (for respiratory conditions) | fluticasone propionate     | flixtotide accuhaler 100 100microgram/inhalation inhalation powder (allen & hanburys ltd) |
| 1642         | corticosteroids (for respiratory conditions) | budesonide                 | budesonide 400micrograms/dose dry powder inhaler                                          |
| 34859        | corticosteroids (for respiratory conditions) | beclometasone dipropionate | beclometasone 250microgram/actuation inhalation powder (neo laboratories ltd)             |
| 16054        | corticosteroids (for respiratory conditions) | budesonide                 | budesonide 200micrograms/actuation breath actuated powder inhaler                         |
| 960          | corticosteroids (for respiratory conditions) | budesonide                 | pulmicort 100 turbohaler (astrazeneca uk ltd)                                             |
| 51480        | corticosteroids (for respiratory conditions) | beclometasone dipropionate | qvar 100 autohaler (de pharmaceuticals)                                                   |
| 7891         | corticosteroids (for respiratory conditions) | fluticasone propionate     | fluticasone 500microgram disc                                                             |
| 56462        | corticosteroids (for respiratory conditions) | beclometasone dipropionate | becodisks 400microgram (waymade healthcare plc)                                           |
| 7638         | corticosteroids (for respiratory conditions) | fluticasone propionate     | fluticasone 250microgram disc                                                             |
| 15706        | corticosteroids (for respiratory conditions) | beclometasone dipropionate | beclometasone 100 micrograms/actuation vortex inhaler                                     |
| 27915        | unknown                                      |                            | fluticasone prop disk refill                                                              |
| 2893         | corticosteroids (for respiratory conditions) | beclometasone dipropionate | beclometasone 200micrograms disc                                                          |
| 5885         | corticosteroids (for respiratory conditions) | fluticasone propionate     | fluticasone propionate 100micrograms/dose dry powder inhaler                              |
| 3898         | corticosteroids (in chronic bowel disorders) | budesonide                 | budesonide 3mg gastro-resistant modified-release capsules                                 |
| 3546         | corticosteroids (for respiratory conditions) | beclometasone dipropionate | qvar 50 inhaler (teva uk ltd)                                                             |
| 30210        | corticosteroids (for respiratory conditions) | beclometasone dipropionate | beclometasone 250micrograms/dose inhaler (teva uk                                         |

| Product code | BNF header                                   | Drug substance             | Drug product                                                                                 |
|--------------|----------------------------------------------|----------------------------|----------------------------------------------------------------------------------------------|
|              |                                              |                            | ltd)                                                                                         |
| 1552         | corticosteroids (for respiratory conditions) | beclometasone dipropionate | becloforte easi-breathe 250microgram/actuation pressurised inhalation (allen & hanburys ltd) |
| 5822         | corticosteroids (for respiratory conditions) | fluticasone propionate     | fluticasone 250micrograms/dose inhaler cfc free                                              |
| 35430        | corticosteroids (for respiratory conditions) | beclometasone dipropionate | becodisks 200microgram with diskhaler (glaxosmithkline uk ltd)                               |
| 42994        | corticosteroids (for respiratory conditions) | fluticasone propionate     | flixtotide 250micrograms/dose accuhaler (glaxosmithkline uk ltd)                             |
| 36290        | corticosteroids (for respiratory conditions) | fluticasone propionate     | flixtotide 50microgram disks with diskhaler (glaxosmithkline uk ltd)                         |
| 24898        | corticosteroids (for respiratory conditions) | beclometasone dipropionate | spacehaler bdp 100microgram/actuation spacehaler (celltech pharma europe ltd)                |
| 35700        | corticosteroids (for respiratory conditions) | fluticasone propionate     | fluticasone propionate 500microgram inhalation powder blisters with device                   |
| 3188         | unknown                                      |                            | pulmicort complete 50 mcg inh                                                                |
| 7788         | corticosteroids (for respiratory conditions) | budesonide                 | budesonide 100micrograms/dose dry powder inhaler                                             |
| 35293        | corticosteroids (for respiratory conditions) | beclometasone dipropionate | beclometasone 200microgram inhalation powder blisters with device                            |
| 8251         | unknown                                      |                            | pulmicort refill 50 mg inh                                                                   |
| 1259         | corticosteroids (for respiratory conditions) | beclometasone dipropionate | beclometasone 200micrograms/dose inhaler                                                     |
| 16525        | corticosteroids (in chronic bowel disorders) | budesonide                 | budenofalk 3mg gastro-resistant capsules (dr. falk pharma uk ltd)                            |
| 1680         | corticosteroids (for respiratory conditions) | budesonide                 | pulmicort ls 50micrograms/dose inhaler (astrazeneca uk ltd)                                  |
| 10254        | corticosteroids (for respiratory conditions) | mometasone furoate         | mometasone 400micrograms/dose dry powder inhaler                                             |
| 20812        | unknown                                      |                            | pulmicort refill                                                                             |
| 14524        | corticosteroids (for respiratory conditions) | beclometasone dipropionate | bdp 250microgram/actuation spacehaler (celltech pharma europe ltd)                           |
| 2992         | corticosteroids (for respiratory conditions) | beclometasone dipropionate | beclazone 50 inhaler (teva uk ltd)                                                           |
| 7602         | corticosteroids (for respiratory conditions) | fluticasone propionate     | fluticasone 50microgram disc                                                                 |
| 16305        | corticosteroids (for respiratory conditions) | fluticasone propionate     | flixtotide 2mg/2ml nebulas (glaxosmithkline uk ltd)                                          |
| 14757        | corticosteroids (for respiratory conditions) | beclometasone dipropionate | pulvinal beclometasone dipropionate 100micrograms/dose dry powder inhaler (chiesi ltd)       |
| 909          | unknown                                      | budesonide                 | budesonide 200micrograms/dose inhaler                                                        |

| Product code | BNF header                                   | Drug substance             | Drug product                                                                                  |
|--------------|----------------------------------------------|----------------------------|-----------------------------------------------------------------------------------------------|
| 1959         | corticosteroids (for respiratory conditions) | budesonide                 | pulmicort 0.5mg respules (astrazeneca uk ltd)                                                 |
| 1861         | corticosteroids (for respiratory conditions) | beclometasone dipropionate | aerobec 100 autohaler (meda pharmaceuticals ltd)                                              |
| 16018        | corticosteroids (for respiratory conditions) | mometasone furoate         | mometasone 200micrograms/dose dry powder inhaler                                              |
| 35631        | corticosteroids (for respiratory conditions) | budesonide                 | budelin novolizer 200micrograms/dose inhalation powder (meda pharmaceuticals ltd)             |
| 60937        | corticosteroids (for respiratory conditions) | budesonide                 | pulmicort 200 turbohaler (dowelhurst ltd)                                                     |
| 50037        | corticosteroids (for respiratory conditions) | budesonide                 | pulmicort 0.5mg respules (waymade healthcare plc)                                             |
| 19389        | corticosteroids (for respiratory conditions) | beclometasone dipropionate | asmabec 50microgram/actuation spacehaler (celltech pharma europe ltd)                         |
| 2282         | corticosteroids (for respiratory conditions) | fluticasone propionate     | fluticasone propionate 500micrograms/dose dry powder inhaler                                  |
| 18848        | corticosteroids (for respiratory conditions) | beclometasone dipropionate | qvar 100micrograms/dose easi-breathe inhaler (teva uk ltd)                                    |
| 2440         | corticosteroids (for respiratory conditions) | fluticasone propionate     | fliotide accuhaler 500 500microgram/inhalation inhalation powder (allen & hanburys ltd)       |
| 23741        | corticosteroids (for respiratory conditions) | budesonide                 | novolizer budesonide 200microgram/actuation pressurised inhalation (meda pharmaceuticals ltd) |
| 3988         | unknown                                      |                            | fliotide diskhaler-community pack 100 mcg                                                     |
| 35724        | corticosteroids (for respiratory conditions) | budesonide                 | budelin novolizer 200micrograms/dose inhalation powder refill (meda pharmaceuticals ltd)      |
| 1380         | corticosteroids (in chronic bowel disorders) | budesonide                 | entocort cr 3mg capsules (astrazeneca uk ltd)                                                 |
| 56144        | corticosteroids (in chronic bowel disorders) | budesonide                 | budenofalk 9mg gastro-resistant granules sachets (dr. falk pharma uk ltd)                     |
| 56475        | corticosteroids (for respiratory conditions) | fluticasone propionate     | fliotide 50micrograms/dose accuhaler (sigma pharmaceuticals plc)                              |
| 40057        | corticosteroids (for respiratory conditions) | budesonide                 | pulmicort 200micrograms/dose inhaler cfc free (astrazeneca uk ltd)                            |
| 1236         | corticosteroids (for respiratory conditions) | beclometasone dipropionate | becloforte 250micrograms/dose inhaler (glaxosmithkline uk ltd)                                |
| 11497        | corticosteroids (for respiratory conditions) | beclometasone dipropionate | beclometasone 400micrograms/dose dry powder inhaler                                           |
| 35408        | corticosteroids (for respiratory conditions) | beclometasone dipropionate | becodisks 100microgram (glaxosmithkline uk ltd)                                               |
| 34315        | corticosteroids (for respiratory conditions) | beclometasone dipropionate | beclometasone 250microgram/actuation inhalation powder (actavis uk ltd)                       |

| Product code | BNF header                                   | Drug substance             | Drug product                                                              |
|--------------|----------------------------------------------|----------------------------|---------------------------------------------------------------------------|
| 956          | corticosteroids (for respiratory conditions) | budesonide                 | pulmicort 200 turbohaler (astrazeneca uk ltd)                             |
| 18394        | corticosteroids (for respiratory conditions) | beclometasone dipropionate | bdp 50microgram/actuation spacehaler (celltech pharma europe ltd)         |
| 14321        | corticosteroids (for respiratory conditions) | beclometasone dipropionate | beclometasone 200micrograms/dose inhaler cfc free                         |
| 11732        | corticosteroids (for respiratory conditions) | beclometasone dipropionate | beclometasone 50micrograms/dose breath actuated inhaler cfc free          |
| 3993         | corticosteroids (for respiratory conditions) | beclometasone dipropionate | filair forte 250micrograms/dose inhaler (meda pharmaceuticals ltd)        |
| 35225        | corticosteroids (for respiratory conditions) | fluticasone propionate     | flixtotide 100microgram disks with diskhaler (glaxosmithkline uk ltd)     |
| 5521         | corticosteroids (for respiratory conditions) | beclometasone dipropionate | beclometasone 200micrograms/dose dry powder inhaler                       |
| 4601         | corticosteroids (for respiratory conditions) | beclometasone dipropionate | asmabec 100 clickhaler (focus pharmaceuticals ltd)                        |
| 16148        | corticosteroids (for respiratory conditions) | beclometasone dipropionate | clenil modulite 250micrograms/dose inhaler (chiesi ltd)                   |
| 2892         | corticosteroids (for respiratory conditions) | beclometasone dipropionate | becloforte 400microgram disks (glaxosmithkline uk ltd)                    |
| 35071        | corticosteroids (for respiratory conditions) | beclometasone dipropionate | becodisks 200microgram (glaxosmithkline uk ltd)                           |
| 35510        | corticosteroids (for respiratory conditions) | budesonide                 | budesonide 200micrograms/dose dry powder inhalation cartridge with device |
| 14567        | corticosteroids (for respiratory conditions) | beclometasone dipropionate | asmabec 250 clickhaler (focus pharmaceuticals ltd)                        |
| 56498        | corticosteroids (for respiratory conditions) | budesonide                 | pulmicort 200 turbohaler (waymade healthcare plc)                         |
| 24660        | unknown                                      |                            | betamethasone valerate                                                    |
| 51997        | corticosteroids (in chronic bowel disorders) | budesonide                 | budesonide 9mg gastro-resistant granules sachets                          |
| 1734         | corticosteroids (for respiratory conditions) | beclometasone dipropionate | beclometasone 100micrograms/dose breath actuated inhaler                  |
| 36090        | corticosteroids (for respiratory conditions) | fluticasone propionate     | flixtotide 100microgram disks (glaxosmithkline uk ltd)                    |
| 5975         | corticosteroids (for respiratory conditions) | fluticasone propionate     | fluticasone 125micrograms/dose inhaler cfc free                           |
| 19401        | corticosteroids (for respiratory conditions) | beclometasone dipropionate | beclometasone 250micrograms/actuation inhaler and compact spacer          |
| 895          | corticosteroids (for respiratory conditions) | beclometasone dipropionate | beclazone 100 easi-breathe inhaler (teva uk ltd)                          |
| 51815        | corticosteroids (for respiratory conditions) | fluticasone propionate     | flixtotide 250micrograms/dose evohaler (waymade healthcare plc)           |
| 36021        | corticosteroids (for respiratory conditions) | fluticasone propionate     | fluticasone propionate 50microgram inhalation powder blisters with device |

| Product code | BNF header                                   | Drug substance             | Drug product                                                                                    |
|--------------|----------------------------------------------|----------------------------|-------------------------------------------------------------------------------------------------|
| 11198        | corticosteroids (for respiratory conditions) | beclometasone dipropionate | beclometasone 50 micrograms/actuation vortex inhaler                                            |
| 50287        | corticosteroids (for respiratory conditions) | beclometasone dipropionate | qvar 100 inhaler (de pharmaceuticals)                                                           |
| 34428        | corticosteroids (for respiratory conditions) | beclometasone dipropionate | beclometasone 50microgram/actuation inhalation powder (neo laboratories ltd)                    |
| 26063        | corticosteroids (for respiratory conditions) | beclometasone dipropionate | beclometasone 100micrograms/dose inhaler (teva uk ltd)                                          |
| 35602        | corticosteroids (for respiratory conditions) | budesonide                 | budesonide 200micrograms/dose dry powder inhalation cartridge                                   |
| 30238        | corticosteroids (for respiratory conditions) | beclometasone dipropionate | beclometasone 50microgram/actuation pressurised inhalation (approved prescription services ltd) |
| 14700        | corticosteroids (for respiratory conditions) | budesonide                 | budesonide 400micrograms/actuation inhaler                                                      |
| 38           | corticosteroids (for respiratory conditions) | beclometasone dipropionate | beclometasone 100micrograms/dose inhaler                                                        |
| 13815        | corticosteroids (for respiratory conditions) | beclometasone dipropionate | beclazone 100microgram/actuation inhalation powder (actavis uk ltd)                             |
| 947          | corticosteroids (for respiratory conditions) | budesonide                 | budesonide 50micrograms/actuation refill canister                                               |
| 10321        | unknown                                      | budesonide                 | budesonide 400microgram inhalation powder capsules                                              |
| 1426         | corticosteroids (for respiratory conditions) | fluticasone propionate     | flioxotide 500microgram disc (allen & hanburys ltd)                                             |
| 3150         | corticosteroids (for respiratory conditions) | beclometasone dipropionate | beclometasone 100micrograms/actuation extrafine particle cfc free inhaler                       |
| 35113        | corticosteroids (for respiratory conditions) | beclometasone dipropionate | beclometasone 200microgram inhalation powder blisters                                           |
| 1424         | corticosteroids (for respiratory conditions) | fluticasone propionate     | flioxotide 250microgram disc (allen & hanburys ltd)                                             |
| 4803         | corticosteroids (for respiratory conditions) | beclometasone dipropionate | beclazone 250microgram/actuation inhalation powder (actavis uk ltd)                             |
| 56493        | corticosteroids (for respiratory conditions) | beclometasone dipropionate | qvar 50micrograms/dose easi-breathe inhaler (sigma pharmaceuticals plc)                         |
| 61664        | corticosteroids (for respiratory conditions) | beclometasone dipropionate | clenil modulite 250micrograms/dose inhaler (waymade healthcare plc)                             |
| 35772        | corticosteroids (for respiratory conditions) | fluticasone propionate     | fluticasone propionate 100microgram inhalation powder blisters                                  |
| 3119         | corticosteroids (for respiratory conditions) | beclometasone dipropionate | becloforte integra 250microgram/actuation inhaler with compact spacer (glaxo laboratories ltd)  |
| 5522         | corticosteroids (for respiratory conditions) | beclometasone dipropionate | beclometasone 100micrograms/dose dry powder inhaler                                             |

| Product code | BNF header                                   | Drug substance             | Drug product                                                                       |
|--------------|----------------------------------------------|----------------------------|------------------------------------------------------------------------------------|
| 25204        | corticosteroids (for respiratory conditions) | beclometasone dipropionate | beclometasone 100micrograms/dose inhaler (a a h pharmaceuticals ltd)               |
| 7724         | corticosteroids (for respiratory conditions) | betamethasone valerate     | betamethasone valerate 100micrograms/actuation inhaler                             |
| 3743         | corticosteroids (for respiratory conditions) | beclometasone dipropionate | filair 50 inhaler (meda pharmaceuticals ltd)                                       |
| 1956         | corticosteroids (for respiratory conditions) | budesonide                 | pulmicort 1mg respules (astrazeneca uk ltd)                                        |
| 56499        | corticosteroids (for respiratory conditions) | fluticasone propionate     | flixtide 500micrograms/dose accuhaler (waymade healthcare plc)                     |
| 2125         | corticosteroids (for respiratory conditions) | budesonide                 | pulmicort 200microgram refill canister (astrazeneca uk ltd)                        |
| 36401        | corticosteroids (for respiratory conditions) | fluticasone propionate     | fluticasone propionate 250microgram inhalation powder blisters with device         |
| 4688         | corticosteroids (for respiratory conditions) | fluticasone propionate     | fluticasone 50microgram/actuation pressurised inhalation                           |
| 3065         | corticosteroids (for respiratory conditions) | betamethasone valerate     | bextasol inhalation powder (allen & hanburys ltd)                                  |
| 35118        | corticosteroids (for respiratory conditions) | beclometasone dipropionate | becodisks 400microgram with diskhaler (glaxosmithkline uk ltd)                     |
| 1518         | corticosteroids (for respiratory conditions) | fluticasone propionate     | flixtide 50microgram/actuation inhalation powder (allen & hanburys ltd)            |
| 5309         | corticosteroids (for respiratory conditions) | fluticasone propionate     | flixtide 50micrograms/dose evohaler (glaxosmithkline uk ltd)                       |
| 47225        | unknown                                      | budesonide                 | budesonide 9mg gastro-resistant granules sachets                                   |
| 30649        | corticosteroids (for respiratory conditions) | budesonide                 | easyhaler budesonide 400micrograms/dose dry powder inhaler (orion pharma (uk) ltd) |
| 35580        | corticosteroids (for respiratory conditions) | beclometasone dipropionate | beclometasone 100microgram inhalation powder blisters with device                  |
| 41412        | corticosteroids (for respiratory conditions) | beclometasone dipropionate | beclometasone 400micrograms/actuation inhaler                                      |
| 20825        | corticosteroids (for respiratory conditions) | beclometasone dipropionate | spacehaler bdp 250microgram/actuation spacehaler (celltech pharma europe ltd)      |
| 35461        | corticosteroids (for respiratory conditions) | fluticasone propionate     | flixtide 250microgram disks with diskhaler (glaxosmithkline uk ltd)                |
| 42985        | corticosteroids (for respiratory conditions) | fluticasone propionate     | flixtide 50micrograms/dose accuhaler (glaxosmithkline uk ltd)                      |
| 9921         | corticosteroids (for respiratory conditions) | beclometasone dipropionate | beclometasone 100micrograms/dose breath actuated inhaler cfc free                  |

| Product code | BNF header                                   | Drug substance             | Drug product                                                                                     |
|--------------|----------------------------------------------|----------------------------|--------------------------------------------------------------------------------------------------|
| 56474        | corticosteroids (for respiratory conditions) | fluticasone propionate     | flixtide 125micrograms/dose evohaler (de pharmaceuticals)                                        |
| 35986        | corticosteroids (for respiratory conditions) | fluticasone propionate     | flixtide 50microgram disks (glaxosmithkline uk ltd)                                              |
| 11149        | glucocorticoid therapy                       | betamethasone              | betnelan 500microgram tablets (focus pharmaceuticals ltd)                                        |
| 1243         | corticosteroids (for respiratory conditions) | beclometasone dipropionate | beclazone 250 easi-breathe inhaler (teva uk ltd)                                                 |
| 31774        | corticosteroids (for respiratory conditions) | beclometasone dipropionate | beclometasone 50micrograms/dose inhaler (generics (uk) ltd)                                      |
| 56477        | corticosteroids (for respiratory conditions) | fluticasone propionate     | flixtide 100micrograms/dose accuhaler (waymade healthcare plc)                                   |
| 2600         | corticosteroids (for respiratory conditions) | beclometasone dipropionate | beclometasone 250micrograms/dose breath actuated inhaler                                         |
| 16151        | corticosteroids (for respiratory conditions) | beclometasone dipropionate | clenil modulite 200micrograms/dose inhaler (chiesi ltd)                                          |
| 1100         | corticosteroids (for respiratory conditions) | beclometasone dipropionate | beclazone 100 inhaler (teva uk ltd)                                                              |
| 1951         | corticosteroids (for respiratory conditions) | beclometasone dipropionate | becodisks 400microgram disc (allen & hanburys ltd)                                               |
| 7948         | corticosteroids (for respiratory conditions) | fluticasone propionate     | fluticasone propionate 250micrograms/dose dry powder inhaler                                     |
| 21482        | corticosteroids (for respiratory conditions) | beclometasone dipropionate | beclometasone 100micrograms/dose inhaler (generics (uk) ltd)                                     |
| 9477         | corticosteroids (for respiratory conditions) | beclometasone dipropionate | asmabec 100microgram/actuation spacehaler (celltech pharma europe ltd)                           |
| 27679        | corticosteroids (for respiratory conditions) | beclometasone dipropionate | beclometasone 100microgram/actuation pressurised inhalation (approved prescription services ltd) |
| 35652        | corticosteroids (for respiratory conditions) | beclometasone dipropionate | beclometasone 100microgram inhalation powder blisters                                            |
| 46157        | corticosteroids (for respiratory conditions) | beclometasone dipropionate | beclometasone 200 cyclocaps (teva uk ltd)                                                        |
| 56484        | corticosteroids (for respiratory conditions) | fluticasone propionate     | flixtide 250micrograms/dose accuhaler (waymade healthcare plc)                                   |
| 3442         | unknown                                      |                            | pulmicort complete 200 mcg inh                                                                   |
| 28761        | corticosteroids (for respiratory conditions) | beclometasone dipropionate | spacehaler bdp 50microgram/actuation spacehaler (celltech pharma europe ltd)                     |
| 5992         | corticosteroids (for respiratory conditions) | beclometasone dipropionate | beclometasone 50micrograms/dose dry powder inhaler                                               |
| 454          | corticosteroids (for respiratory conditions) | budesonide                 | pulmicort 200microgram inhaler (astrazeneca uk ltd)                                              |



| Product code | BNF header                                   | Drug substance             | Drug product                                                             |
|--------------|----------------------------------------------|----------------------------|--------------------------------------------------------------------------|
| 3220         | corticosteroids (for respiratory conditions) | beclometasone dipropionate | qvar 50 autohaler (teva uk ltd)                                          |
| 18537        | unknown                                      | budesonide                 | budesonide 200microgram inhalation powder capsules                       |
| 57555        | corticosteroids (for respiratory conditions) | fluticasone propionate     | flixtide 125micrograms/dose evohaler (dowelhurst ltd)                    |
| 48709        | corticosteroids (for respiratory conditions) | beclometasone dipropionate | qvar 100micrograms/dose easi-breathe inhaler (sigma pharmaceuticals plc) |
| 16584        | corticosteroids (for respiratory conditions) | beclometasone dipropionate | beclometasone 50micrograms/dose inhaler cfc free                         |
| 35392        | corticosteroids (for respiratory conditions) | fluticasone propionate     | flixtide 500microgram disks with diskhaler (glaxosmithkline uk ltd)      |

## FP\_SAL codes

| Product code | BNF header                                                             | Drug substance                              | Drug product                                                                                |
|--------------|------------------------------------------------------------------------|---------------------------------------------|---------------------------------------------------------------------------------------------|
| 638          | Selective Beta 2 Agonists/Corticosteroids (for Respiratory Conditions) | Fluticasone propionate/Salmeterol xinafoate | Seretide 250 Accuhaler (GlaxoSmithKline UK Ltd)                                             |
| 665          | Selective Beta 2 Agonists/Corticosteroids (for Respiratory Conditions) | Salmeterol xinafoate/Fluticasone propionate | Seretide 100 Accuhaler (GlaxoSmithKline UK Ltd)                                             |
| 3666         | Selective Beta 2 Agonists/Corticosteroids (for Respiratory Conditions) | Salmeterol xinafoate/Fluticasone propionate | Seretide 500 Accuhaler (GlaxoSmithKline UK Ltd)                                             |
| 5143         | Selective Beta 2 Agonists/Corticosteroids (for Respiratory Conditions) | Fluticasone propionate/Salmeterol xinafoate | Seretide 50 Evohaler (GlaxoSmithKline UK Ltd)                                               |
| 5161         | Selective Beta 2 Agonists/Corticosteroids (for Respiratory Conditions) | Fluticasone propionate/Salmeterol xinafoate | Seretide 125 Evohaler (GlaxoSmithKline UK Ltd)                                              |
| 5172         | Selective Beta 2 Agonists/Corticosteroids (for Respiratory Conditions) | Fluticasone propionate/Salmeterol xinafoate | Seretide 250 Evohaler (GlaxoSmithKline UK Ltd)                                              |
| 5558         | Selective Beta 2 Agonists/Corticosteroids (for Respiratory Conditions) | Salmeterol Xinafoate/Fluticasone Propionate | Salmeterol 50micrograms with fluticasone 500micrograms CFC free inhaler                     |
| 5864         | Selective Beta 2 Agonists/Corticosteroids (for Respiratory Conditions) | Salmeterol Xinafoate/Fluticasone Propionate | Salmeterol 25micrograms with fluticasone 250micrograms CFC free inhaler                     |
| 5942         | Selective Beta 2 Agonists/Corticosteroids (for Respiratory Conditions) | Salmeterol Xinafoate/Fluticasone Propionate | Salmeterol 50micrograms with fluticasone 250micrograms CFC free inhaler                     |
| 6569         | Selective Beta 2 Agonists/Corticosteroids (for Respiratory Conditions) | Salmeterol Xinafoate/Fluticasone Propionate | Salmeterol 25micrograms with fluticasone 125micrograms CFC free inhaler                     |
| 6616         | Selective Beta 2 Agonists/Corticosteroids (for Respiratory Conditions) | Salmeterol Xinafoate/Fluticasone Propionate | Salmeterol 25micrograms with fluticasone 50micrograms CFC free inhaler                      |
| 6938         | Selective Beta 2 Agonists/Corticosteroids (for Respiratory Conditions) | Salmeterol Xinafoate/Fluticasone Propionate | Salmeterol 50micrograms with fluticasone 100micrograms dry powder inhaler                   |
| 11410        | Selective Beta 2 Agonists/Corticosteroids (for Respiratory Conditions) | Salmeterol xinafoate/Fluticasone propionate | Fluticasone propionate 500micrograms/dose / Salmeterol 50micrograms/dose dry powder inhaler |
| 11588        | Selective Beta 2 Agonists/Corticosteroids (for Respiratory Conditions) | Fluticasone propionate/Salmeterol xinafoate | Fluticasone 125micrograms/dose / Salmeterol 25micrograms/dose inhaler CFC free              |
| 11618        | Selective Beta 2 Agonists/Corticosteroids (for Respiratory Conditions) | Fluticasone propionate/Salmeterol xinafoate | Fluticasone 250micrograms/dose / Salmeterol 25micrograms/dose inhaler CFC free              |
| 12994        | Selective Beta 2 Agonists/Corticosteroids (for Respiratory Conditions) | Fluticasone propionate/Salmeterol xinafoate | Fluticasone 50micrograms/dose / Salmeterol 25micrograms/dose inhaler CFC free               |
| 13040        | Selective Beta 2 Agonists/Corticosteroids                              | Fluticasone propionate/Salmeterol xinafoate | Fluticasone propionate 250micrograms/dose /                                                 |

| Product code | BNF header                                                             | Drug substance                                       | Drug product                                                                                |
|--------------|------------------------------------------------------------------------|------------------------------------------------------|---------------------------------------------------------------------------------------------|
|              | (for Respiratory Conditions)                                           |                                                      | Salmeterol 50micrograms/dose dry powder inhaler                                             |
| 13273        | Selective Beta 2 Agonists/Corticosteroids (for Respiratory Conditions) | Salmeterol xinafoate/Fluticasone propionate          | Fluticasone propionate 100micrograms/dose / Salmeterol 50micrograms/dose dry powder inhaler |
| 48739        | Selective Beta 2 Agonists/Corticosteroids (for Respiratory Conditions) | Fluticasone propionate/Salmeterol xinafoate          | Seretide 250 Evohaler (DE Pharmaceuticals)                                                  |
| 49000        | Selective Beta 2 Agonists/Corticosteroids (for Respiratory Conditions) | Fluticasone propionate/Salmeterol xinafoate          | Seretide 250 Evohaler (Waymade Healthcare Plc)                                              |
| 50560        | Selective Beta 2 Agonists/Corticosteroids (for Respiratory Conditions) | Fluticasone propionate/Salmeterol xinafoate          | Seretide 250 Accuhaler (Sigma Pharmaceuticals Plc)                                          |
| 50689        | Selective Beta 2 Agonists/Corticosteroids (for Respiratory Conditions) | Fluticasone propionate/Formoterol fumarate dihydrate | Flutiform 50micrograms/dose / 5micrograms/dose inhaler (Napp Pharmaceuticals Ltd)           |
| 50886        | Selective Beta 2 Agonists/Corticosteroids (for Respiratory Conditions) | Fluticasone propionate/Salmeterol xinafoate          | Seretide 250 Evohaler (Stephar (U.K.) Ltd)                                                  |
| 51027        | Selective Beta 2 Agonists/Corticosteroids (for Respiratory Conditions) | Fluticasone propionate/Salmeterol xinafoate          | Seretide 125 Evohaler (DE Pharmaceuticals)                                                  |
| 51151        | Selective Beta 2 Agonists/Corticosteroids (for Respiratory Conditions) | Fluticasone propionate/Salmeterol xinafoate          | Seretide 125 Evohaler (Lexon (UK) Ltd)                                                      |
| 51270        | Selective Beta 2 Agonists/Corticosteroids (for Respiratory Conditions) | Fluticasone propionate/Formoterol fumarate dihydrate | Fluticasone 50micrograms/dose / Formoterol 5micrograms/dose inhaler CFC free                |
| 51394        | Selective Beta 2 Agonists/Corticosteroids (for Respiratory Conditions) | Salmeterol xinafoate/Fluticasone propionate          | Seretide 500 Accuhaler (Waymade Healthcare Plc)                                             |
| 51593        | Selective Beta 2 Agonists/Corticosteroids (for Respiratory Conditions) | Salmeterol xinafoate/Fluticasone propionate          | Seretide 500 Accuhaler (DE Pharmaceuticals)                                                 |
| 51861        | Selective Beta 2 Agonists/Corticosteroids (for Respiratory Conditions) | Salmeterol xinafoate/Fluticasone propionate          | Seretide 500 Accuhaler (Mawdsley-Brooks & Company Ltd)                                      |
| 51909        | Selective Beta 2 Agonists/Corticosteroids (for Respiratory Conditions) | Fluticasone propionate/Salmeterol xinafoate          | Seretide 250 Evohaler (Necessity Supplies Ltd)                                              |
| 53230        | Selective Beta 2 Agonists/Corticosteroids (for Respiratory Conditions) | Fluticasone propionate/Salmeterol xinafoate          | Seretide 250 Accuhaler (DE Pharmaceuticals)                                                 |
| 53283        | Selective Beta 2 Agonists/Corticosteroids (for Respiratory Conditions) | Salmeterol xinafoate/Fluticasone propionate          | Seretide 100 Accuhaler (Waymade Healthcare Plc)                                             |
| 55411        | Corticosteroids Used In Nasal Allergy/Antihistamines In Nasal Allergy  | Fluticasone propionate/Azelastine hydrochloride      | Fluticasone propionate 50micrograms/dose / Azelastine 137micrograms/dose nasal spray        |
| 55435        | Corticosteroids Used In Nasal Allergy/Antihistamines In Nasal Allergy  | Fluticasone propionate/Azelastine hydrochloride      | Dymista 137micrograms/dose / 50micrograms/dose nasal spray (Meda Pharmaceuticals Ltd)       |

| Product code | BNF header                                                             | Drug substance                              | Drug product                                                        |
|--------------|------------------------------------------------------------------------|---------------------------------------------|---------------------------------------------------------------------|
| 55677        | Selective Beta 2 Agonists/Corticosteroids (for Respiratory Conditions) | Salmeterol xinafoate/Fluticasone propionate | Seretide 500 Accuhaler (Lexon (UK) Ltd)                             |
| 61280        | Selective Beta 2 Agonists/Corticosteroids (for Respiratory Conditions) | Fluticasone propionate/Salmeterol xinafoate | Seretide 250 Accuhaler (Waymade Healthcare Plc)                     |
| 62126        | Selective Beta 2 Agonists/Corticosteroids (for Respiratory Conditions) | Salmeterol xinafoate/Fluticasone propionate | Seretide 100 Accuhaler (DE Pharmaceuticals)                         |
| 63252        | Selective Beta 2 Agonists/Corticosteroids (for Respiratory Conditions) | Fluticasone propionate/Salmeterol xinafoate | Seretide 250 Evohaler (Lexon (UK) Ltd)                              |
| 63945        | Selective Beta 2 Agonists/Corticosteroids (for Respiratory Conditions) | Fluticasone propionate/Salmeterol xinafoate | Seretide 250 Accuhaler (Lexon (UK) Ltd)                             |
| 64372        | Selective Beta 2 Agonists/Corticosteroids (for Respiratory Conditions) | Fluticasone propionate/Salmeterol xinafoate | Sirdupla 25micrograms/dose / 125micrograms/dose inhaler (Mylan Ltd) |
| 64373        | Selective Beta 2 Agonists/Corticosteroids (for Respiratory Conditions) | Fluticasone propionate/Salmeterol xinafoate | Sirdupla 25micrograms/dose / 250micrograms/dose inhaler (Mylan Ltd) |
| 65117        | Selective Beta 2 Agonists/Corticosteroids (for Respiratory Conditions) | Fluticasone propionate/Salmeterol xinafoate | Seretide 125 Evohaler (Mawdsley-Brooks & Company Ltd)               |

1  
2  
3  
4  
5  
6  
7  
8  
9  
10  
11  
12  
13  
14  
15  
16  
17  
18  
19  
20  
21  
22  
23  
24  
25  
26  
27  
28  
29  
30  
31  
32  
33  
34  
35  
36  
37  
38  
39  
40  
41  
42  
43  
44  
45  
46  
47

For peer review only

**STROBE 2007 (v4) Statement—Checklist of items that should be included in reports of *cohort studies***

| Section/Topic                | Item # | Recommendation                                                                                                                                                                       | Reported on page #                                                                                                             |
|------------------------------|--------|--------------------------------------------------------------------------------------------------------------------------------------------------------------------------------------|--------------------------------------------------------------------------------------------------------------------------------|
| Title and abstract           | 1      | (a) Indicate the study's design with a commonly used term in the title or the abstract                                                                                               | 1                                                                                                                              |
|                              |        | (b) Provide in the abstract an informative and balanced summary of what was done and what was found                                                                                  | 3 (note: is a protocol for an observational study so here and subsequently is reported <i>what is planned to be done</i> only) |
| <b>Introduction</b>          |        |                                                                                                                                                                                      |                                                                                                                                |
| Background/rationale         | 2      | Explain the scientific background and rationale for the investigation being reported                                                                                                 | 5                                                                                                                              |
| Objectives                   | 3      | State specific objectives, including any prespecified hypotheses                                                                                                                     | 6                                                                                                                              |
| <b>Methods</b>               |        |                                                                                                                                                                                      |                                                                                                                                |
| Study design                 | 4      | Present key elements of study design early in the paper                                                                                                                              | 6                                                                                                                              |
| Setting                      | 5      | Describe the setting, locations, and relevant dates, including periods of recruitment, exposure, follow-up, and data collection                                                      | 6                                                                                                                              |
| Participants                 | 6      | (a) Give the eligibility criteria, and the sources and methods of selection of participants. Describe methods of follow-up                                                           | 7 - 10                                                                                                                         |
|                              |        | (b) For matched studies, give matching criteria and number of exposed and unexposed                                                                                                  | 7 - 10                                                                                                                         |
| Variables                    | 7      | Clearly define all outcomes, exposures, predictors, potential confounders, and effect modifiers. Give diagnostic criteria, if applicable                                             | 13 - 14                                                                                                                        |
| Data sources/<br>measurement | 8*     | For each variable of interest, give sources of data and details of methods of assessment (measurement). Describe comparability of assessment methods if there is more than one group | 6                                                                                                                              |
| Bias                         | 9      | Describe any efforts to address potential sources of bias                                                                                                                            | 14 - 16                                                                                                                        |
| Study size                   | 10     | Explain how the study size was arrived at                                                                                                                                            | 14                                                                                                                             |
| Quantitative variables       | 11     | Explain how quantitative variables were handled in the analyses. If applicable, describe which groupings were chosen and why                                                         | 11                                                                                                                             |

|                     |     |                                                                                                                                                                                                              |                                                      |
|---------------------|-----|--------------------------------------------------------------------------------------------------------------------------------------------------------------------------------------------------------------|------------------------------------------------------|
| Statistical methods | 12  | (a) Describe all statistical methods, including those used to control for confounding                                                                                                                        | 14 - 16                                              |
|                     |     | (b) Describe any methods used to examine subgroups and interactions                                                                                                                                          | 14 - 16                                              |
|                     |     | (c) Explain how missing data were addressed                                                                                                                                                                  | 16                                                   |
|                     |     | (d) If applicable, explain how loss to follow-up was addressed                                                                                                                                               | NA                                                   |
|                     |     | (e) Describe any sensitivity analyses                                                                                                                                                                        | 14 - 16                                              |
| <b>Results</b>      |     |                                                                                                                                                                                                              | <i>NA (is a protocol for an observational study)</i> |
| Participants        | 13* | (a) Report numbers of individuals at each stage of study—eg numbers potentially eligible, examined for eligibility, confirmed eligible, included in the study, completing follow-up, and analysed            |                                                      |
|                     |     | (b) Give reasons for non-participation at each stage                                                                                                                                                         |                                                      |
|                     |     | (c) Consider use of a flow diagram                                                                                                                                                                           |                                                      |
| Descriptive data    | 14* | (a) Give characteristics of study participants (eg demographic, clinical, social) and information on exposures and potential confounders                                                                     |                                                      |
|                     |     | (b) Indicate number of participants with missing data for each variable of interest                                                                                                                          |                                                      |
|                     |     | (c) Summarise follow-up time (eg, average and total amount)                                                                                                                                                  |                                                      |
| Outcome data        | 15* | Report numbers of outcome events or summary measures over time                                                                                                                                               |                                                      |
| Main results        | 16  | (a) Give unadjusted estimates and, if applicable, confounder-adjusted estimates and their precision (eg, 95% confidence interval). Make clear which confounders were adjusted for and why they were included |                                                      |
|                     |     | (b) Report category boundaries when continuous variables were categorized                                                                                                                                    |                                                      |
|                     |     | (c) If relevant, consider translating estimates of relative risk into absolute risk for a meaningful time period                                                                                             |                                                      |
| Other analyses      | 17  | Report other analyses done—eg analyses of subgroups and interactions, and sensitivity analyses                                                                                                               |                                                      |
| <b>Discussion</b>   |     |                                                                                                                                                                                                              | <i>NA (is a protocol for an observational study)</i> |
| Key results         | 18  | Summarise key results with reference to study objectives                                                                                                                                                     |                                                      |
| <b>Limitations</b>  |     |                                                                                                                                                                                                              | <i>NA (is a protocol for an observational study)</i> |
| Interpretation      | 20  | Give a cautious overall interpretation of results considering objectives, limitations, multiplicity of analyses, results from similar studies, and other relevant evidence                                   |                                                      |

|                          |    |                                                                                                                                                               |   |
|--------------------------|----|---------------------------------------------------------------------------------------------------------------------------------------------------------------|---|
| Generalisability         | 21 | Discuss the generalisability (external validity) of the study results                                                                                         |   |
| <b>Other information</b> |    |                                                                                                                                                               |   |
| Funding                  | 22 | Give the source of funding and the role of the funders for the present study and, if applicable, for the original study on which the present article is based | 2 |

\*Give information separately for cases and controls in case-control studies and, if applicable, for exposed and unexposed groups in cohort and cross-sectional studies.

**Note:** An Explanation and Elaboration article discusses each checklist item and gives methodological background and published examples of transparent reporting. The STROBE checklist is best used in conjunction with this article (freely available on the Web sites of PLoS Medicine at <http://www.plosmedicine.org/>, Annals of Internal Medicine at <http://www.annals.org/>, and Epidemiology at <http://www.epidem.com/>). Information on the STROBE Initiative is available at [www.strobe-statement.org](http://www.strobe-statement.org).



# BMJ Open

## Real world effects of medications for chronic obstructive pulmonary disease: protocol for a UK population-based non-interventional cohort study with validation against randomised trial results

|                                 |                                                                                                                                                                                                                                                                                                                                                                                                                                                                                                                         |
|---------------------------------|-------------------------------------------------------------------------------------------------------------------------------------------------------------------------------------------------------------------------------------------------------------------------------------------------------------------------------------------------------------------------------------------------------------------------------------------------------------------------------------------------------------------------|
| Journal:                        | <i>BMJ Open</i>                                                                                                                                                                                                                                                                                                                                                                                                                                                                                                         |
| Manuscript ID                   | bmjopen-2017-019475.R1                                                                                                                                                                                                                                                                                                                                                                                                                                                                                                  |
| Article Type:                   | Protocol                                                                                                                                                                                                                                                                                                                                                                                                                                                                                                                |
| Date Submitted by the Author:   | 05-Dec-2017                                                                                                                                                                                                                                                                                                                                                                                                                                                                                                             |
| Complete List of Authors:       | Wing, Kevin; London School of Hygiene and Tropical Medicine, Williamson, Elizabeth; London School of Hygiene and Tropical Medicine, Carpenter, James; London School of Hygiene and Tropical Medicine Wise, Lesley; London School of Hygiene and Tropical Medicine Schneeweiss, Sebastian; Brigham and Womens' Hospital, Harvard Medical School<br>Smeeth, Liam; London School of Hygiene and Tropical Medicine Quint, Jennifer; Imperial College London<br>Douglas, Ian; London School of Hygiene and Tropical Medicine |
| <b>Primary Subject Heading</b>: | Epidemiology                                                                                                                                                                                                                                                                                                                                                                                                                                                                                                            |
| Secondary Subject Heading:      | Evidence based practice, Research methods, Respiratory medicine, Public health, Pharmacology and therapeutics                                                                                                                                                                                                                                                                                                                                                                                                           |
| Keywords:                       | Chronic airways disease < THORACIC MEDICINE, Epidemiology < THORACIC MEDICINE, CLINICAL PHARMACOLOGY, EPIDEMIOLOGY, PRIMARY CARE, PUBLIC HEALTH                                                                                                                                                                                                                                                                                                                                                                         |
|                                 |                                                                                                                                                                                                                                                                                                                                                                                                                                                                                                                         |

SCHOLARONE™  
Manuscripts

**TITLE PAGE**

**Title:** Real world effects of medications for chronic obstructive pulmonary disease: protocol for a UK population-based non-interventional cohort study with validation against randomised trial results

**Authors:**Kevin Wing<sup>1\*</sup>Elizabeth Williamson<sup>2</sup>James Carpenter<sup>2</sup>Lesley Wise<sup>1</sup>Sebastian Schneeweiss<sup>3,4</sup>Liam Smeeth<sup>1</sup>Jennifer Quint<sup>5</sup>Ian Douglas<sup>1</sup>

<sup>1</sup>Department of Non-communicable Disease Epidemiology, Faculty of Epidemiology and Population Health, London School of Hygiene and Tropical Medicine, London, UK

<sup>2</sup>Department of Medical Statistics, Faculty of Epidemiology and Population Health, London School of Hygiene and Tropical Medicine, London, UK

<sup>3</sup>Department of Epidemiology, Harvard Medical School.

<sup>4</sup>Division of Pharmacoepidemiology and Pharmacoeconomics, Department of Medicine, Brigham & Women's Hospital

<sup>5</sup>National Heart and Lung Institute, Imperial College London, London, United Kingdom

**\*Submitting and corresponding author:** Kevin Wing ([kevin.wing@lshtm.ac.uk](mailto:kevin.wing@lshtm.ac.uk)), London School of Hygiene and Tropical Medicine, Keppel Street, London WC1E 7HT. Tel: +44 20 7636 8636, Fax: +44 20 7436 5389

## Funding statement

This work was supported by NIHR grant number 15/80/28

## Competing interests statement

Dr Wing and Dr Williamson declare no competing interests.

Professor Carpenter is funded 60% by a grant from the MRC, via a secondment to the MRC Clinical Trials Unit. The remaining funding is a combination of HEFCE and small contributions from various NIHR, ESRC, MRC and EU funds. He undertakes methodological consultancy work for Novartis and GlaxoSmithKline, and has given missing data courses for GlaxoSmithKline, Bayer and Boehringer.

Professor Smeeth reports grants from Wellcome, MRC, NIHR, BHF, Diabetes UK, ESRC and the EU; grants and personal fees for advisory work from GSK, and personal fees for advisory work from AstraZeneca. He is a Trustee of the British Heart Foundation.

Dr Wise is an independent consultant to the pharmaceutical industry and is employed to provide advice by a number of different companies none of which is involved in this therapeutic area.

Professor Schneeweiss is a consultant to WHISCON, LLC and to Aetion, Inc., a software manufacturer of which he also owns equity. He is principal investigator of investigator-initiated grants to the Brigham and Women's Hospital from Bayer, Genentech and Boehringer Ingelheim unrelated to the topic of this study. He does not receive personal fees from biopharmaceutical companies.

Professor Smeeth reports grants from Wellcome, MRC, NIHR, BHF, Diabetes UK, ESRC and the EU; grants and personal fees for advisory work from GSK, and personal fees for advisory work from AstraZeneca. He is a Trustee of the British Heart Foundation.

Dr Quint's research group has received funding from MRC, Wellcome, BLF, GSK, BI, AZ and Insmad for other projects, none of which relate to this work.

Dr Douglas is funded by an unrestricted grant from, has consulted for and holds stock in GlaxoSmithKline.

**Word count (not including abstract, tables, figures, or footnotes): 4386**

**Statement about prior postings and presentations:** This work has not been published elsewhere.

## Abstract

### Introduction

Chronic obstructive pulmonary disease (COPD) is a progressive disease affecting 3 million people in the UK, in which patients exhibit airflow obstruction that is not fully reversible. COPD treatment guidelines are largely informed by randomised controlled trial (RCT) results, but it is unclear if these findings apply to large patient populations not studied in trials. Non-interventional studies could be used to study patient groups excluded from trials, but the use of these studies to estimate treatment effectiveness is in its infancy. In this study we will use individual trial data to validate non-interventional methods for assessing COPD treatment effectiveness, before applying these methods to analysing treatment effectiveness within people excluded from, or under-represented in COPD trials.

### Methods and analysis

Using individual patient data from the landmark COPD TORCH trial and validated methods for detecting COPD and exacerbations in routinely collected primary care data, we will assemble a cohort in the UK Clinical Practice Research Datalink (selecting people from between the dates of 1<sup>st</sup> January 2004 and 1<sup>st</sup> January 2017) with similar characteristics to TORCH participants and test whether non-interventional data can generate comparable results to trials, using cohort methodology with propensity score techniques to adjust for potential confounding. We will then use the methodological template we have developed to determine risks and benefits of COPD treatments in people excluded from TORCH. Outcomes are pneumonia, COPD exacerbation, mortality and time to treatment change. Groups to be studied include the elderly (>80 years), people with substantial comorbidity, people with and without underlying cardiovascular disease and people with mild COPD.

### Ethics and dissemination

Ethical approval has been granted by the LSHTM Medicines Ethics Committee (Ref: 11997). The study is under review by the Independent Scientific Advisory Committee (ISAC) of the UK Medicines and Healthcare Products Regulatory Agency (MHRA). An application to use the TORCH trial data made to [clinicalstudydatarequest.com](http://clinicalstudydatarequest.com) has been approved. In addition to scientific publications, dissemination methods will be developed based on discussions with COPD patient groups.

## Strengths and limitations of this study

### Strengths

- Large cohort study
- Use of validated methods for detecting COPD within the Clinical Practice Research Datatlink
- Use of randomised controlled trial (RCT) individual patient data to assess ability of non-interventional methods to detect COPD treatment effects within an RCT-analogous population

### Limitations

- Adherence to medication will need to be assessed based on proxy variables (e.g. time covered by prescription)

# Introduction

## Background and rationale

Chronic obstructive pulmonary disease (COPD) affects 3 million people in the UK.<sup>1</sup> The most common cause is smoking, and patients exhibit airflow obstruction that is not fully reversible. The disease is progressive, with declining lung function and a worsening of symptoms. Most troublesome are acute exacerbations manifested as a sudden worsening of symptoms e.g. severe coughing, shortness of breath and chest congestion, requiring urgent treatment, and possibly hospitalisation. Whilst smoking cessation remains the most effective intervention, the rate of exacerbation can be reduced by regular medication such as combination long-acting beta-agonists (LABA) and inhaled corticosteroids (ICS) or long-acting muscarinic antagonists (LAMAs).<sup>2,3</sup>

COPD treatment guidelines are largely informed by randomised controlled trial (RCT) results,<sup>4</sup> but it is not clear if these findings apply to large patient populations not studied in trials. Fluticasone propionate + salmeterol (FP/SAL) is a LABA/ICS combination and is one of the most widely used COPD treatments. It was studied in large randomised trials (e.g. the TORCH trial),<sup>2</sup> but the effects of treatment in important patient groups who were not studied are unknown. Some were excluded from trials (e.g. those >80 years and those with substantial comorbidity) while others are under represented (e.g. people with mild COPD),<sup>2,5</sup> meaning conclusions about these groups are difficult to make.

Whilst the conduct of non-interventional studies (sometimes also referred to as “observational studies”) to investigate possible drug harms is well established, the use of these studies to estimate treatment effectiveness is in its infancy. Issues of treatment channelling and indication bias mean that measuring the intended benefit of a treatment is beset with difficulties. Over the next few years we will see more non-interventional studies of drug effectiveness emerging due to recent legislation requiring pharmaceutical companies to study the real world effects of medications;<sup>6,7</sup> however, rigorous, validated methodology is needed to translate these complex data into reliable evidence. For example, the availability of anonymised individual patient data from randomised controlled trials provides the potential for “RCT-analogue” cohorts to be selected from non-interventional data sources (by matching patient records from non-interventional data to the RCT patient records on key characteristics). If subsequent analysis of a non-interventional RCT-analogue cohort generates results that are similar to those generated by the reference RCT, one could be confident in the validity of the results, and in the non-interventional methods used to obtain these results.

In this study we will use TORCH<sup>2</sup> individual trial data to validate non-interventional methods for assessing COPD treatment effectiveness, before going on to apply these methods to analysing treatment effectiveness within people excluded from or underrepresented in the TORCH trial. Non-

1 interventional data will be obtained from the UK Clinical Practice Research Datalink (linked to the  
2 Hospital Episodes Statistics database).<sup>8</sup> The results we generate will aid patients, prescribers and  
3 policy makers in deciding the most appropriate treatment for COPD for all types of patients. The  
4 approach used can also provide a template for treatment effectiveness research using non-  
5 interventional data with inbuilt validation against a randomised trial.  
6  
7  
8  
9

## 10 **Aims and objectives**

11  
12  
13 The aims of our study are (1) to measure the association between treatments for COPD and COPD  
14 exacerbation rate, mortality, pneumonia, and time to treatment change amongst patients not  
15 included in randomised clinical trials for COPD treatments and (2) to develop a methodological  
16 framework with in built validation against RCT data, for using non-interventional electronic health  
17 records (EHR) to answer questions about drug treatment effects (i.e. both benefits and risks).

18  
19 Specific objectives are to: (1) validate methods for measuring COPD medication effectiveness in EHR  
20 data by comparing with trial results; (2) use EHR data to measure COPD medication effectiveness in  
21 patients excluded from trials (most importantly those >80 years or with substantial comorbidity) and  
22 (3) determine COPD treatment effectiveness in an under-studied disease stage (mild COPD).  
23  
24  
25  
26  
27  
28  
29  
30  
31

## 32 **Methods and analysis**

33  
34 Figure 1 provides a high-level overview of the study, detailing each objective and data source used,  
35 and showing how existing RCT data will be used in Objective 1 in order to validate methods for  
36 analysing COPD in routinely collected electronic health data that will then be applied to unanswered  
37 questions in Objective 2 and 3.  
38  
39  
40  
41

## 42 **Study design**

43  
44 We have chosen a cohort study design as it will allow us to measure the effects of prescribing  
45 different treatments for COPD on future outcomes in different types of patients. Eligibility criteria  
46 for cohort entry will vary between objectives (detailed in the selection of participants section  
47 below).  
48  
49  
50  
51

## 52 **Setting/data sources**

1 Patient data used in this study will be obtained from two different sources: the TORCH randomised  
2 trial and the UK Clinical Practices Research Datalink (CPRD) (linked to Hospital Episodes Statistics –  
3 HES – data).  
4  
5

#### 6 **TORCH**

7  
8 TORCH was a placebo controlled randomised trial of the combined inhaler fluticasone propionate  
9 (FP) + salmeterol (SAL) (FP/SAL) for the treatment of COPD, published in 2007. Patients were  
10 randomised to receive FP/SAL, FP alone, SAL alone or placebo and the primary comparison of  
11 interest was between FP/SAL and placebo.<sup>2</sup> Key outcomes were expected benefits (rate of COPD  
12 exacerbation and mortality) and an expected harm due to the immunosuppressive action of the  
13 corticosteroid FP (pneumonia). Whilst findings for the primary endpoint of mortality were null, this  
14 was thought to be due to poor statistical power as a result of a lower than anticipated mortality rate.  
15 Nonetheless, a lower rate of exacerbations was seen with FP/SAL, and a higher rate of pneumonia  
16 was observed. As one of the largest trials in COPD, and with three year follow up, TORCH is a  
17 landmark study, providing a validation point for our study. We will obtain individual patient data  
18 from the TORCH study via [www.clinicalstudydatarequest.com](http://www.clinicalstudydatarequest.com) for use in Objective 1 (see selection of  
19 participants section below)  
20  
21  
22  
23  
24  
25  
26

#### 27 **CPRD**

28  
29 The CPRD is a very large database of prospectively collected, anonymised UK population-based  
30 electronic health records. CPRD primary care records comprise ~8-10% of the UK population and  
31 contain comprehensive information on clinical diagnoses, prescribing, referrals, tests and  
32 demographic/lifestyle factors.<sup>8</sup> In order to contribute to the database, general practices and other  
33 health centres must meet prespecified standards for research-quality data (i.e. be “up to standard”).  
34 Data quality/validity are therefore high and the data are nationally representative.<sup>8,9</sup> A patient starts  
35 contributing follow-up time to the database at the date they join an “up to standard” practice (or  
36 the date that their practice starts contributing up to standard data), and stop contributing follow-up  
37 time on either their death date, their transfer out date (the date that they leave the database due to  
38 reasons other than death) or on the last collection date for their practice. Linkage between the  
39 primary care records in CPRD and hospital episode statistics (HES) is well established for >60% of  
40 practices in the CPRD, providing a data set augmented with detailed secondary care diagnostic and  
41 procedural records. Algorithms have been established to identify COPD, COPD exacerbations and  
42 pneumonia (both hospital and primary care managed) in CPRD/HES linked data (including validated  
43 algorithms for COPD and exacerbations).<sup>10-12</sup> See supplementary materials for a high-level overview  
44 of these algorithms.  
45  
46  
47  
48  
49  
50  
51  
52  
53  
54  
55  
56  
57  
58  
59  
60



1  
2  
3 **Figure 1: Overview of study objectives and sources of data for the COPD real-world medicines effects study (RCT=randomised controlled trial, CPRD=**  
4 **the UK Clinical Practice Research Datalink, FP/SAL=Fluticasone propionate + salmeterol)**  
5  
6

7 [FIGURE 1 HERE]  
8  
9  
10  
11  
12  
13  
14  
15  
16  
17  
18  
19  
20  
21  
22  
23  
24  
25  
26  
27  
28  
29  
30  
31  
32  
33  
34  
35  
36  
37  
38  
39  
40  
41  
42  
43  
44  
45  
46  
47

**A. Work performed by others prior to this study**

Of the total population of people with COPD, only a subset are included in RCTs of COPD treatments, based on the RCT inclusion/exclusion criteria. The RCT generates results that inform clinical practice, and the anonymised raw data for the study can be made available to other researchers via the Clinical Study Data Request website. For this study, the specific COPD treatment-RCT of interest is the TORCH trial,<sup>2</sup> investigating the effect of FP/SAL on COPD exacerbations.

**B. Work to be performed as part of this study**

1. Objective 1

A cohort of TORCH (RCT)-analogous patients will be selected from the UK Clinical Practice Research Datalink (CPRD), by matching people with COPD within CPRD to the records of people included in the trial. An analysis of the effect of FP/SAL on COPD exacerbations will then be performed on this TORCH-analogous CPRD cohort. If the results obtained are comparable to those obtained in the TORCH trial itself, this will serve as a validation step, showing that data from the non-interventional (“real-world”) CPRD source can reliably be used to study COPD treatment effects.

2. Objective 2

The validated analysis techniques used for Objective 1 will then be used to study people in CPRD who would not have been eligible for inclusion in an RCT due to their age and the presence of other comorbidities, and for whom the effect of FP/SAL is currently unknown.

3. Objective 3

The validated analysis techniques will then be used to study people with mild COPD only, who have been under-represented in RCTs, and for whom the effect of COPD treatments is unclear.

## Selection of participants

Participants will be selected from the CPRD from between the dates of 1<sup>st</sup> January 2004 and 1<sup>st</sup> January 2017. All patients will need to have been registered with an up-to standard practice for at least 12 months. Participant selection criteria will then vary by objective as detailed below.

### Objective 1: Validation of non-interventional methods by comparing with trial results

An overview of each of the steps for participant selection for Objective 1 is provided in Figure 2.

#### Step 1

We will select all patients in the CPRD with COPD who are eligible for HES-linkage and during the period covered by the linkage would have met the following TORCH study **inclusion** criteria:

- a diagnosis of COPD
- age 40-80 years
- smoking history
- lung function (FEV<sub>1</sub> <60% predicted, FEV<sub>1</sub>/FVC ratio <70%)

An eligible-for-inclusion date will then be assigned as the date that all of the above inclusion criteria were met for the individual. We will then exclude any individual who has any of the following TORCH study **exclusion** criteria prior to their eligible-for-inclusion date:

- a diagnosis of asthma (within the previous 5 years)
- a diagnosis for any (non-COPD) respiratory disorder
- a record of lung surgery
- a diagnosis of alpha-1 antitrypsin deficiency
- evidence of drug or alcohol abuse
- a record of having received long-term oxygen therapy
- diagnoses for conditions likely to interfere with the TORCH trial or cause death within 3 years
- current use of oral corticosteroid therapy (defined as continuous use for greater than 6 weeks, with courses of oral corticosteroidsteroids separated by a period of less than 7 days considered as continuous use)
- any exposure to FP/SAL within the previous 4 weeks

Finally, in-line with the TORCH trial approach, anyone who has an exacerbation requiring oral corticosteroid therapy or hospitalisation during the run-in period (the 2-week period following eligibility) will also be excluded.

Feasibility counts in the CPRD indicate there are ~13,000 patients meeting these criteria (Figure 2). Given the limited information on how asthma exclusions were applied in the TORCH study, we will perform a sensitivity analysis in which the asthma exclusion is a diagnosis within the previous 1 year, rather than 5 years as specified above.

### Step 2

Next we will determine if/when these patients ever received FP/SAL. During any time between attaining TORCH eligibility and a subsequent prescription for FP/SAL, patients will be eligible for inclusion as an unexposed patient in Objective 1. There may be multiple time periods within a person's record where eligibility as an unexposed patient is met (Figure 3). Feasibility work shows that between 1<sup>st</sup> January 2004 and 1<sup>st</sup> January 2017 there were ~11,000 TORCH eligible patients in CPRD who did not receive FP/SAL at the time they attained TORCH eligibility and therefore have at least one time period that means they are eligible for inclusion as an Objective 1 unexposed participant (Figure 2). Individuals in CPRD who have more than one unexposed eligibility period within their record (Figure 3) will be able to contribute more than once to the pool of unexposed participants (with the covariates and person-time contributed unique to the specific unexposed eligibility period).

### Step 3

Having obtained individual level patient data for TORCH participants from [clinicalstudydatarequest.com](http://clinicalstudydatarequest.com), we will then match each TORCH participant (n=6,112) 1:1 with the closest available unexposed patient record in the CPRD pool of FPSAL untreated patients obtained in Step 2. Matching will be based on the following TORCH baseline characteristics:

- age
- sex
- body mass index
- previous treatment with:
  - inhaled corticosteroids
  - long acting beta-agonists
- history of COPD exacerbations
- history of cardiovascular disease
- lung function

Where an individual from CPRD has multiple unexposed "eligibility periods" that can be matched to a TORCH participant, the CPRD characteristics that will be matched on will be those from the beginning of the specific eligibility period.

Some of the TORCH inclusion criteria will not be fully assessable using CPRD data (e.g. we will be able to assess whether patients are smokers but will not always know their pack year history). Hence the inclusion/exclusion criteria are analogous with TORCH criteria but we acknowledge they are not identical. Identification of criteria will be done based on algorithms already determined and by the identification of clinical codes in the CPRD. For those individuals that have contributed multiple unexposed records to the pool of CPRD unexposed participants (Figure 3), after one of their unexposed records has been matched to a TORCH participant we will remove all of their other unexposed records (meaning that an individual can only appear once in the final TORCH-matched

1 unexposed cohort). We anticipate matching all or the majority of TORCH participants with a CPRD  
2 patient, giving us a pool of TORCH-analogous untreated patients within CPRD, with similar baseline  
3 characteristics as TORCH participants at the point of randomisation ( $n \sim 6,000$ , Figure 2).  
4

#### 6 *Step 4*

7 Following this, we will select all patients in CPRD meeting the TORCH eligibility criteria specified  
8 above, and who also received treatment with FP/SAL (either on the date of eligibility or at a later  
9 date). From feasibility work, we anticipate  $\sim 12,000$  eligible FP/SAL treated patients (Figure 2), some  
10 of whom may have multiple time-periods of treated patient eligibility and therefore could contribute  
11 more than once to the initial pool of treated patients (Figure 3). In contrast to the unexposed  
12 TORCH-eligible cohort, our initial approach will not involve matching participants of the exposed  
13 TORCH-eligible cohort with participants from the TORCH trial, as this would negatively impact the  
14 ability to calculate propensity scores for receiving FP/SAL in Step 5. Note that there will be overlap  
15 between those selected as untreated (in Step 2) and as treated (in Step 4). Approximately 90% of the  
16 Step 4 treated patients will also have been eligible as Step 2 untreated patients, as they will have  
17 had periods where they were not treated with FP/SAL and met the Step 2 untreated eligibility  
18 criteria in addition to separate periods where they were treated with FP/SAL and met the Step 4  
19 treated eligibility criteria (Figure 3). If a person is included in both the untreated Step 2 and treated  
20 Step 4 cohorts, they will be contributing different periods of their person-time to each cohort (pre-  
21 FP/SAL treatment for Step 2 vs post-FP/SAL treatment for Step 4), and this will be handled in the  
22 analysis by assigning different index dates for Step 2 compared to Step 4.  
23

#### 33 *Step 5*

34 We will combine the CPRD groups obtained in Steps 3 and 4 ( $n \sim 18,000$ , see note in Step 4 relating to  
35 90% overlap) and using their baseline characteristics will calculate propensity scores for receiving  
36 FP/SAL. The propensity score calculation will be based upon a wide range of covariates (see  
37 statistical analysis section for full details). Where a participant is contributing more than one treated  
38 time period record to the pool of exposed records (as described in Step 4), baseline characteristics  
39 will be updated at the beginning of each treatment-eligible period. Multiple eligible treatment  
40 periods from a single person are then included in the propensity score model as if they came from  
41 different individuals. The variables selected for the score will then become the basis for propensity  
42 score modelling in Objectives 2 and 3.  
43

#### 48 *Step 6*

49 Each untreated patient derived in Step 3 ( $n \sim 6,000$ ) will be matched 1:1 with the FP/SAL treated  
50 patient record from Step 4 with the closest propensity score ( $\sim 12,000$ ) giving us an analysis  
51 population for Objective 1 of  $\sim 12,000$  patients – double the size of TORCH (Figure 2). For those  
52 individuals that have contributed multiple exposed records to the pool of CPRD exposed participants  
53 (Figure 3), after one of their exposed records has been propensity-score matched to an unexposed  
54  
55  
56  
57  
58  
59

1 participant, we will remove all other exposed records for that individual from the remaining pool of  
2 CPRD exposed participants. This will mean that an individual can only appear once as an exposed  
3 participant in the final propensity-score matched cohort. The index date will be the start of follow  
4 up.  
5  
6

7 We will also apply an alternative additional approach for Objective 1, where instead of generating  
8 and using propensity scores to obtain a final analysis population at Steps 5 and 6, we will match  
9 records from our exposed TORCH-eligible cohort with participants from the TORCH trial to create a  
10 TORCH-analogous exposed patient cohort. This will then be combined with the TORCH-analogous  
11 unexposed patient cohort to create a final analysis population (with multivariable regression  
12 techniques used to account for confounding instead of propensity scores).  
13  
14  
15  
16  
17  
18  
19  
20  
21  
22  
23  
24  
25  
26  
27  
28  
29  
30  
31  
32  
33  
34  
35  
36  
37  
38  
39  
40  
41  
42  
43  
44  
45  
46  
47  
48  
49  
50  
51  
52  
53  
54  
55  
56  
57  
58  
59  
60

1 **Figure 2: Flowchart illustrating the planned selection of CPRD participants for Objective 1**  
2  
3 **of the COPD real-world medicines effects study**

4  
5 **[FIGURE 2 HERE]**  
6  
7  
8  
9  
10  
11  
12  
13  
14  
15  
16  
17  
18  
19  
20  
21  
22  
23  
24  
25  
26  
27  
28  
29  
30  
31  
32  
33  
34  
35  
36  
37  
38  
39

40 **Note in relation to Step 5 (n~18,000) compared to Step 1 (n~13,000):** Approximately 90% of the treated patients will also  
41 have been eligible as untreated patients, as they did not receive FP/SAL on their TORCH-eligibility date. This means that  
42 they will have at least one period of time during which they are untreated-eligible but then did subsequently go-on to  
43 receive FP/SAL (meaning they have at least one period of time during which they are treated-eligible). If a person is  
44 included as both a treated and untreated participant, they will be contributing different periods of their person-time to  
45 each cohort (pre-FP/SAL treatment for the untreated versus post-FP/SAL treatment for treated), and this is handled in the  
46 analysis by assigning different index dates  
47  
48  
49  
50  
51  
52  
53  
54  
55  
56  
57  
58  
59  
60

1  
2  
3  
4  
5  
6  
7  
8  
9  
10  
11  
12  
13

**Figure 3: Example timeline for a person in CPRD who is eligible for participation in Objective 1, illustrating multiple periods of unexposed/exposed (FL/SAL untreated/treated) eligibility.**

14  
15  
16  
17  
18  
19  
20  
21  
22  
23  
24  
25  
26  
27  
28  
29  
30

[FIGURE 3 HERE]

1. **1<sup>st</sup> date of study eligibility:** person meets TORCH eligibility as detailed in Objective 1, Step 1 on this date i.e. has a diagnosis of COPD, is between 0-80 years, FEV1<60% predicted and FEV1/FVC ratio <70%, smoking history, no asthma history, no lung surgery history, no long-term O<sub>2</sub> therapy, no alpha-1 antitrypsin deficiency, no drug/alcohol abuse, no exposure to FP/SAL within the previous 4 weeks.

2. **Eligible to enter study as an untreated participant:** patient can be selected as an untreated participant on any date within this period (as detailed in Step 2).

3. **Eligible to enter study as a treated participant:** FP/SAL treatment starts, patient is able to be selected as a treated study participant on the date that FP/SAL treatment starts (as detailed in Step 4).

4. **Eligible to enter study as an untreated participant:** patient stops treatment, but is not immediately eligible for selection again as an untreated study participant. After 4 weeks of no FP/SAL treatment however, they meet the TORCH eligibility criteria, and may be selected at any date during the remaining one untreated week as an untreated patient. This is the second untreated period that this person can contribute to the total pool of untreated period records that will be available for matching to the TORCH participants (as detailed in Steps 2 and 3).

5. **Eligible to enter study as a treated participant:** FP/SAL treatment (re)starts, patient can be selected as a treated study participant on the date that FP/SAL treatment (re)starts. This is the second treated period that this person can contribute to the total pool of treated period records that will be available for propensity score matching to the untreated participants (as detailed in Steps 4 to 6).

31  
32  
33  
34  
35  
36  
37  
38  
39  
40  
41  
42  
43  
44  
45  
46  
47  
48  
49  
50

**Objective 2: Measurement of COPD treatment effects in patients excluded from trials**

We will include patients with a valid COPD diagnosis in the CPRD<sup>8</sup> meeting these additional criteria:

(1) age >80 years OR (2) history of lung surgery OR (3) history of long term oxygen therapy OR (4) evidence of drug/alcohol abuse OR (4) an asthma diagnosis at any time prior to inclusion OR (5) substantial comorbidity. In relation to substantial comorbidity, TORCH required people to be excluded from the trial if they had serious uncontrolled disease with a likelihood of causing death within 3 years. It is likely this criterion affected participant selection and led to a lower overall rate of death than originally anticipated, although we recognise this criterion is subjective. During Objective 1 we will be able to select groups of people who were generally not included despite being eligible, most likely because of this subjective exclusion criterion. We anticipate this will be people with substantial comorbidity e.g. serious vascular disease. Status for such diseases is readily identified in both the CPRD data and in the TORCH baseline data. We will only be able to specify this criterion in detail after we have completed Objective 1.

51  
52  
53  
54  
55  
56  
57  
58  
59  
60

Participants for Objective 2 will be selected in a similar fashion to Objective 1, with the additional eligibility criteria mentioned above applied (i.e. a modified Step 1). As for Objective 1, each participant will be allowed to have multiple FP/SAL exposed and unexposed eligibility periods in their record, as described in Figure 3. In contrast to Objective 1, there will be no matching of unexposed

1 patients to TORCH patients, as we do not require a TORCH-analagous cohort for this analysis (i.e. no  
2 Step 3). All other selection steps will be as applied for Objective 1, including the use of propensity  
3 score matching in order to obtain comparable unexposed and exposed groups for analysis.  
4  
5

### 6 **Objective 3: Determination of treatment effects in an under-studied disease stage**

7  
8 We will include patients with a valid COPD diagnosis in the CPRD<sup>8</sup> meeting these additional criteria:  
9 (1) >60% predicted FEV1 (or >50% plus MRC breathlessness scale 1 or 2, or >50% plus COPD  
10 Assessment Test (CAT) score <10) AND (2) no exacerbations in the year post COPD diagnosis. We will  
11 also perform a sensitivity analysis where we allow the group of people with FEV1 >60% predicted  
12 who had a maximum of one exacerbation within 1 year post COPD diagnosis to be included. As for  
13 Objective 2, the selection steps will be similar to Objective 1, with modified criteria for step 1 and  
14 the removal of the TORCH-matching step (step 3).  
15  
16  
17  
18

### 19 **Exposures, outcomes and co-variates**

#### 20 **Exposures**

21  
22 For all objectives, exposures will be determined using CPRD prescribing records and code lists for  
23 COPD treatments (codelists provided in supplementary materials).  
24  
25

26  
27 For Objective 1, incident use of FP/SAL (tradename Seretide) is the primary exposure of interest and  
28 will be compared with no treatment. We will limit included patients to those receiving Seretide  
29 500/50, the dose used in TORCH. This information is recorded for all prescriptions of Seretide and  
30 this dose is the only currently approved dose for COPD in the UK (though we recognise some  
31 prescribing may not follow the licensed indication).  
32  
33  
34

35 As a secondary analysis in Objective 1 other treatments for COPD will also be compared with no  
36 treatment in this objective. Namely:  
37  
38

- 39 a) long-acting beta agonist (LABA)
  - 40 b) long-acting muscarinic antagonist (LAMA)
  - 41 c) LABA + LAMA
  - 42 d) LABA + inhaled corticosteroid (ICS) other than FP/SAL
  - 43 f) LABA + LAMA + ICS
- 44  
45  
46

47 For Objectives 2 and 3 we will again use recorded prescribing information to determine the dose  
48 recieved. We will be reliant mostly on the strength of each individual drug which is recorded  
49 automatically against each product and does not require GPs to enter this data, ensuring  
50 completeness. We will then be able to stratify analyses based on the dose prescribed. Specific  
51 exposures for Objectives 2 and 3 are as follows:  
52  
53  
54

- 55 a) No treatment
  - 56 b) LABA
- 57  
58  
59  
60



- 1 c) LAMA
- 2 d) LABA + LAMA
- 3 e) LABA + ICS
- 4 f) LABA + LAMA + ICS
- 5

## 6 **Outcomes**

7 Outcomes to be measured are as follows:

- 10 1. COPD exacerbation: to be defined using a CPRD-Hospital Episodes Statistics (HES) algorithm developed previously by authors of this study protocol<sup>10</sup>
- 11
- 12 2. All cause mortality: as recorded in ONS mortality statistics (data that is linked to CPRD data)
- 13
- 14 3. Pneumonia: as defined using a CPRD-HES algorithm published previously by authors of this study protocol<sup>11</sup>
- 15
- 16 4. Time to COPD treatment change: determined by prescribing records indicating the start of a new, additional COPD treatment
- 17
- 18
- 19
- 20

## 21 **Covariates**

22 Covariates to be considered for inclusion in the propensity score include the following (all obtained from CPRD data):

- 26 • Lung function (FEV1, FEV1/FVC)
- 27 • Age
- 28 • Gender
- 29 • Body mass index
- 30 • Alcohol consumption
- 31 • Vascular disease (broken into individual components e.g. hypertension, heart failure, atherosclerotic disease)
- 32 • Use of prescribed aspirin and statins
- 33 • Prior treatment with other COPD medication
- 34 • Type 2 diabetes
- 35 • History of cancer
- 36 • Renal disease
- 37 • Healthcare utilisation intensity (number of prior visits, hospitalisations, number of distinct medications used, number of procedures)
- 38
- 39
- 40
- 41
- 42

## 43 **Sample size**

### 44 **Objective 1**

45 Assuming a baseline conservative exacerbation rate of 0.5 per patient per year,<sup>10</sup> we would only require a sample of 408 patients per treatment group to detect a reduction in annual exacerbation rate to 0.4 per year, with 80% power and 5% significance. The estimated sample size is ~12,000 which will provide ample power for the main outcomes of interest, but also allow stratification by patient characteristics to determine stratified results, and will also be ample for the secondary analyses where we will use 99% confidence intervals. For example, to detect a reduction from 0.5 to

1 0.4 exacerbations per year with 80% power and 1% significance we would need ~600 people in each  
2 treatment group.  
3

### 4 **Objectives 2 and 3**

5 We are also confident that we will have sufficient numbers to allow well powered analyses for  
6 Objectives 2 and 3. For example a feasibility count looking at the number of people over the age of  
7 80 eligible for inclusion in Objective 2 estimated that there would be >2,000 people in each exposure  
8 group.  
9  
10  
11  
12

### 13 **Statistical analysis**

#### 14 **Propensity score for addressing confounding**

15 The propensity score will be constructed using the principle that predictors of the exposure and  
16 outcome, or outcome only (mortality) should be included. We will consider a wide range of factors  
17 for inclusion, such as: age, sex, body mass index, alcohol consumption, and a wide range of  
18 comorbidities (e.g. type 2 diabetes, coronary heart disease, cerebrovascular disease, peripheral  
19 vascular disease, heart failure, hypertension, renal disease, cancer). We will further adjust for  
20 healthcare utilisation intensity (number of prior visits, hospitalisations, number of distinct  
21 medications used, number of procedures, etc.) as these are generic correlates of disease state and  
22 the likelihood of recording completeness. We have substantial prior experience of building  
23 propensity models,<sup>13-15</sup> and our study team includes the lead of an MRC funded project to determine  
24 optimal propensity score methods for use with missing data (EW).<sup>16</sup>  
25  
26  
27  
28  
29  
30  
31  
32

33 For Objective 1, every untreated patient will be PS matched 1:1 with an FP/SAL treated patient that  
34 has an FP/SAL treated period with the closest propensity score, resulting in a TORCH analogous  
35 cohort of FP/SAL treated and untreated CPRD patients (n~12,000).  
36  
37

38 For the additional alternative approach to Objective 1 relying on matching of both unexposed and  
39 exposed patients to the TORCH trial patients (described in Selection of participants – Objective 1 –  
40 Step 6), we will use multivariable regression techniques to address confounding, considering a  
41 similar wide range of covariates for adjustment.  
42  
43  
44

45 The propensity score model obtained in Objective 1 will be the basis for propensity score modelling  
46 in Objectives 2 and 3, but additional variables will also be considered given the different nature of  
47 the patient populations being studied in these Objectives.  
48  
49

#### 50 **Methods of analysis**

51 Comparisons will be made according to FP/SAL status for rate of COPD exacerbation, pneumonia and  
52 mortality over 3 years. All analyses will be performed according to the intention-to-treat principle (as  
53 was done in the TORCH study), meaning that if a participant enters the study as either an exposed or  
54 unexposed participant, they will remain assigned to that exposure category for the entire duration of  
55  
56  
57  
58  
59  
60

1 their follow-up (irrespective as to whether their true exposure status changes). For exacerbations, a  
2 negative binomial model will be used, accounting for variability between patients in the number and  
3 frequency of exacerbations, with the number of exacerbations as the outcome and the log of treated  
4 time as an offset variable. Time to mortality and first pneumonia will be analysed using Cox  
5 proportional hazards regression. This mirrors TORCH endpoints of major benefit and harm. We  
6 anticipate the propensity matching process will allow us to assemble treated and untreated groups  
7 that are very similar with respect to baseline characteristics except FP/SAL treatment status.  
8 However, this will be tested by assessing standardised differences for each baseline variable. If  
9 substantial differences are noted for important variables, it may be necessary to further adjust the  
10 statistical models. This could also include examining the effect of using greedy vs optimum matching  
11 approaches in order to obtain the closest propensity score match, and/or matching at a ratio other  
12 than 1:1.<sup>17</sup>

### 20 **Validation of results against TORCH**

21 We will validate our findings against TORCH as part of Objective 1 by determining whether results of  
22 the CPRD analysis are compatible with the TORCH rate ratio for exacerbations (0.75; 95% CI 0.69-  
23 0.81). This outcome has been selected as it is an outcome of key significance for people with COPD<sup>4</sup>  
24 and the result in TORCH shows a clear benefit with 95% confidence intervals below 1. We have set  
25 two criteria that must be met for us to conclude results are consistent. First the effect size must be  
26 clinically comparable with TORCH findings; the rate ratio for exacerbations in CPRD must be between  
27 0.65 and 0.9. This range is deliberately not symmetrical around the TORCH estimate of 0.75 as we  
28 would anticipate the treatment effect in routine clinical care may be weaker than that seen in the  
29 optimised setting of a randomised trial. We recognise this rule could be met with a poorly powered,  
30 inconclusive result, so a second criterion is that the 95% confidence interval for the rate ratio must  
31 exclude 1.

### 40 **Handling measurement of adherence to medication**

41 Adherence to issued prescribing in general practice is likely to vary according to the treatment issued  
42 e.g. short course antibiotic treatment is notoriously not well adhered to, whereas long term life-  
43 saving treatment such as antiretroviral medication is more likely to be taken as prescribed. Whilst  
44 we do not have figures for adherence for COPD medication in UK general practice, we are able to  
45 estimate the proportion of time covered by prescribing as a proxy for adherence and will account for  
46 this in our analyses. Moreover, our intention is to estimate the effect of prescribing at the  
47 population level, and to some extent, the clinical effects we will measure are in part due to  
48 pharmacological effects, and in part the way the treatment is taken which includes adherence. Also  
49 of note, prescribing for COPD in the UK is predominantly through GPs and so we will not be missing  
50 prescribing information from other potential sources of treatment.

1 The data analysis for adherence will necessarily be a significant element of the work to be done for  
2 this study. However, we have reviewed the records for a random sample of 30 people with COPD  
3 starting treatment with FP/SAL to look at adherence patterns over the course of a year. Of the 30  
4 patients, 20 (67%) were still receiving Seretide (FP/SAL) one year after starting treatment. Of the 20  
5 who received Seretide for a full year, 15 (75%) received sufficient prescriptions to suggest at least  
6 50% adherence over the year, and 8 (40%) had sufficient prescriptions to suggest 80% adherence or  
7 higher. As expected, this suggests two things: Firstly adherence is likely to be poorer in routine  
8 clinical care than in the trial population; in TORCH 80% of participants were estimated to have  
9 adherence at 80% or higher. Secondly there is a wide range of adherence in routine care. This will  
10 allow us to estimate both the population level effects of treatment as actually used in routine care,  
11 but also to estimate the treatment effect in patients with more similar levels of adherence to TORCH  
12 participants. Whilst we acknowledge that prescribing can only be a proxy for used medication, we  
13 believe it is not an unreasonable assumption that the amount of medication prescribed is correlated  
14 with the amount consumed. In the event that Objective 1 detects a null or poorer treatment effect  
15 than anticipated (rate ratio > 0.9), we will conduct a sensitivity analysis restricted to people  
16 estimated to be covered by FP/SAL treatment for 80% of their follow up.

### 26 **Misclassification of (1) drug exposure periods and (2) outcome status**

27 It is possible that an individual may still be exposed to FP/SAL for some time after a prescription has  
28 finished, for example if they have medication at home that they haven't used from a previous  
29 prescription. This would mean that people may become eligible for inclusion in the unexposed group  
30 while they are actually still exposed. If our result differs from the TORCH results (e.g. a rate ratio  
31 <0.65 or >0.9), we will conduct a sensitivity analysis in which we include an additional (grace)  
32 exposed period equivalent to the length of a single prescription at the end of each actual exposed  
33 period, and only classify individuals as eligible for inclusion as unexposed at the end of this  
34 additional period.

35 Our results could also be impacted by misclassification of outcome, given the routine nature of the  
36 data. Our initial approach for detection of COPD exacerbations is to use a validated case definition  
37 from previous work that maximises positive predictive value while maintaining a relatively high  
38 sensitivity.<sup>12</sup> If our result differs from the TORCH results, we will consider performing a sensitivity  
39 analysis in which we assess the impact of applying alternative case definitions for COPD  
40 exacerbations (see supplementary materials for an overview of articles relating to the case  
41 definitions we plan to utilise, including any validity measurements provided).

### 42 **Missing data**

43 CPRD data are shown to be almost complete for drug prescribing and mortality (partly through ONS  
44 linkage). Smoking history tends to be very well recorded for people with COPD and missingness is

likely to be minimal.<sup>10</sup> Information on important comorbidity is also well recorded in CPRD. We will conduct both complete record analyses and use multiple imputation where appropriate assumptions hold, applying findings from methodological work led by one of the study team (EW) into the use of multiple imputation in propensity score modelling.<sup>16</sup>

## **Ethics and dissemination**

### **Approval by ethics and scientific committees**

Ethical approval for this study has been obtained from the London School of Hygiene & Tropical Medicine Ethics Committee (Ref: 11997).

An application for scientific approval related to use of the CPRD data has been made to the Independent Scientific Advisory Committee (ISAC) of the Medicines and Healthcare Products Regulatory Agency. CPRD data are already approved via a National Research Ethics Committee for purely non-interventional research of this type.

An application for use of the TORCH trial individual patient data was made to the clinicalstudydatarequest.com site, which is checked by the Wellcome Trust and relevant sponsors to make sure information is complete and that the sponsor's requirements for informed consent have been met. The application is then sent to an independent review panel that consider the scientific rationale, objectives, publication plan, conflicts of interest and qualifications and experience of the research team before making a decision on providing access to the data. We recently obtained approval of all aspects of this application.

### **Dissemination plans**

Dissemination of findings will be via a combination of channels. The work will be published in high ranking peer reviewed journals and we anticipate 3 publications to arise directly from the planned work. Findings will also be presented at relevant scientific conferences such as the British Thoracic Society Conference and the European Respiratory Society International Congress. We will also engage with patients already identified from a clinic run by one of the authors of this protocol (JQ) and from Breathe Easy Groups and with relevant charities such as the British Lung Foundation to determine the most relevant ways to disseminate results directly to patients in an accessible manner, and to help our understanding of the likely impact of results to specific groups of patients. We will communicate directly with NICE to ensure they are kept informed of results that are of direct relevance to the guidance they have issued on COPD, and with the Medicines and Healthcare Products Regulatory Agency if it appears that findings may impact the risk/benefit profile of COPD treatments.

## References

1. Comission H. Cleaning the air: a national study of chronic pulmonary disease. 2006.
2. Calverley PMA, Anderson JA, Celli B, Ferguson GT, Jenkins C, Jones PW, et al. Salmeterol and Fluticasone Propionate and Survival in Chronic Obstructive Pulmonary Disease. *N Engl J Med*. 2007 Feb 22;356(8):775–89.
3. Tashkin DP, Celli B, Senn S, Burkhart D, Kesten S, Menjoge S, et al. A 4-Year Trial of Tiotropium in Chronic Obstructive Pulmonary Disease. *N Engl J Med*. 2008 Oct 9;359(15):1543–54.
4. National Institute for Health and Care Excellence (NICE). Chronic obstructive pulmonary disease in over 16s: diagnosis and management | Guidance and guidelines | NICE. 2010;
5. Ferguson GT, Anzueto A, Fei R, Emmett A, Knobil K, Kalberg C, et al. Maintenance pharmacotherapy of mild and moderate COPD: what is the evidence? *Respir Med*. 2011 Sep;105(9):1268–74.
6. EU. REGULATION (EU) No 1235/2010 OF THE EUROPEAN PARLIAMENT AND OF THE COUNCIL. 2010.
7. Spring S. Guidance for Industry Postmarketing Studies and Clinical Trials — Implementation of Section 505(o)(3) of the Federal Food, Drug, and Cosmetic Act.
8. Herrett E, Gallagher AM, Bhaskaran K, Forbes H, Mathur R, Staa T van, et al. Data Resource Profile: Clinical Practice Research Datalink (CPRD). *Int J Epidemiol*. 2015 Jun;44(3):827–36.
9. Herrett E, Thomas SL, Schoonen WM, Smeeth L, Hall AJ. Validation and validity of diagnoses in the General Practice Research Database: a systematic review. *Br J Clin Pharmacol*. 2010 Jan;69(1):4–14.
10. Quint JK, Müllerova H, DiSantostefano RL, Forbes H, Eaton S, Hurst JR, et al. Validation of chronic obstructive pulmonary disease recording in the Clinical Practice Research Datalink (CPRD-GOLD). *BMJ Open*. 2014;4(7):e005540.
11. Millett ERC, Quint JK, Smeeth L, Daniel RM, Thomas SL. Incidence of Community-Acquired Lower Respiratory Tract Infections and Pneumonia among Older Adults in the United Kingdom: A Population-Based Study. Heimesaat MM, editor. *PLoS One*. 2013 Sep 11;8(9):e75131.
12. Rothnie KJ, Müllerová H, Hurst JR, Smeeth L, Davis K, Thomas SL, et al. Validation of the Recording of Acute Exacerbations of COPD in UK Primary Care Electronic Healthcare Records. Chotirmall SH, editor. *PLoS One*. 2016 Mar 9;11(3):e0151357.

- 1 13. Douglas I, Evans S, Smeeth L. Effect of statin treatment on short term mortality after  
2 pneumonia episode: cohort study. *BMJ*. 2011 Apr 6;342:d1642.
- 3
- 4 14. Williamson E, Morley R, Lucas A, Carpenter J. Propensity scores: From naïve enthusiasm to  
5 intuitive understanding. *Stat Methods Med Res*. 2012 Jun 24;21(3):273–93.
- 6
- 7
- 8 15. Root AA, Wong AYS, Ghebremichael-Weldeselassie Y, Smeeth L, Bhaskaran K, Evans SJW, et  
9 al. Evaluation of the risk of cardiovascular events with clarithromycin using both propensity  
10 score and self-controlled study designs. *Br J Clin Pharmacol*. 2016 Aug;82(2):512–21.
- 11
- 12
- 13 16. Leyrat C, Seaman SR, White IR, Douglas I, Smeeth L, Kim J, et al. Propensity score analysis  
14 with partially observed covariates: How should multiple imputation be used? *Stat Methods  
15 Med Res*. 2017 Jun 2;96228021771303.
- 16
- 17
- 18 17. Austin PC. An Introduction to Propensity Score Methods for Reducing the Effects of  
19 Confounding in Observational Studies. *Multivariate Behav Res*. 2011 May;46(3):399–424.
- 20
- 21
- 22
- 23
- 24

## 25 **Authors contributions**

26  
27  
28 KW, EW, JC, LW, SS, LS, JQ, ID contributed to study question and design. KW wrote the first draft of  
29 the protocol manuscript (based upon original grant/scientific approval applications to NIHR and ISAC  
30 that KW, EW, JC, LW, SS, LS, JQ and ID all contributed to). KW, EW, JC, LW, SS, LS, JQ, ID contributed  
31 to further drafts and approved the final version.  
32  
33

## 34 **Acknowledgements**

35  
36  
37 No information for this section.  
38

## 39 **Data sharing statement**

40  
41  
42 There are currently no unpublished data from this study, as it is a protocol.  
43

44 All of the data sources described can be accessed by making formal applications to the owners of the  
45 data (i.e. CPRD/HES data for the routinely collected non-interventional data and  
46 clinicalstudyrequest.com for the trial data used for validation of non-interventional methods).  
47  
48  
49  
50  
51  
52  
53  
54  
55  
56  
57  
58  
59  
60

## Figure legends

**Figure 1: Overview of study objectives and sources of data for the COPD real-world medicines effects study (RCT=randomised controlled trial, CPRD= the UK Clinical Practice Research Datalink, FP/SAL=Fluticasone propionate + salmeterol)**

**Figure 2: Flowchart illustrating the planned selection of CPRD participants for Objective 1 of the COPD real-world medicines effects study**

**Figure 3: Example timeline for a person in CPRD who is eligible for participation in Objective 1, illustrating multiple periods of unexposed/exposed (FL/SAL untreated/treated) eligibility.**



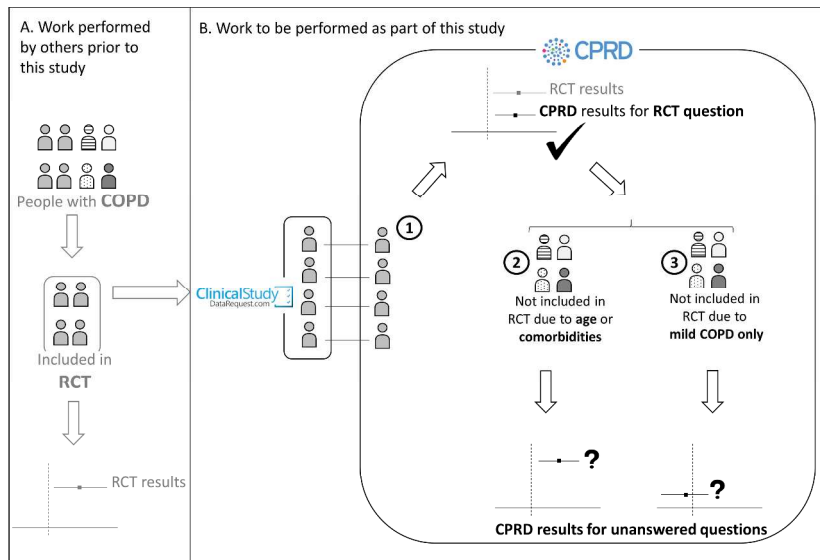

Figure 1: Overview of study objectives and sources of data for the COPD real-world medicines effects study (RCT=randomised controlled trial, CPRD= the UK Clinical Practice Research Datalink, FP/SAL=Fluticasone propionate + salmeterol)

338x190mm (300 x 300 DPI)

1  
2  
3  
4  
5  
6  
7  
8  
9  
10  
11  
12  
13  
14  
15  
16  
17  
18  
19  
20  
21  
22  
23  
24  
25  
26  
27  
28  
29  
30  
31  
32  
33  
34  
35  
36  
37  
38  
39  
40  
41  
42  
43  
44  
45  
46  
47  
48  
49  
50  
51  
52  
53  
54  
55  
56  
57  
58  
59  
60

FIGURE 2

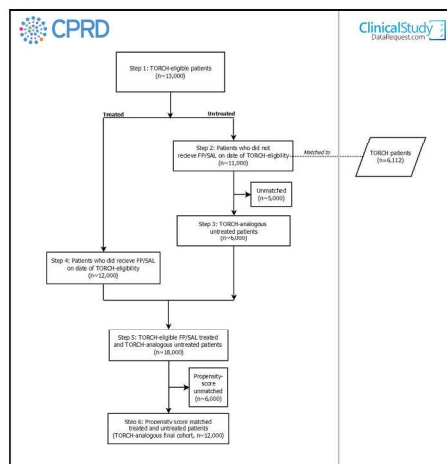

Figure 2: Flowchart illustrating the planned selection of CPRD participants for Objective 1 of the COPD real-world medicines effects study

338x190mm (300 x 300 DPI)

Review only

1  
2  
3  
4  
5  
6  
7  
8  
9  
10  
11  
12  
13  
14  
15  
16  
17  
18  
19  
20  
21  
22  
23  
24  
25  
26  
27  
28  
29  
30  
31  
32  
33  
34  
35  
36  
37  
38  
39  
40  
41  
42  
43  
44  
45  
46  
47  
48  
49  
50  
51  
52  
53  
54  
55  
56  
57  
58  
59  
60

FIGURE 3

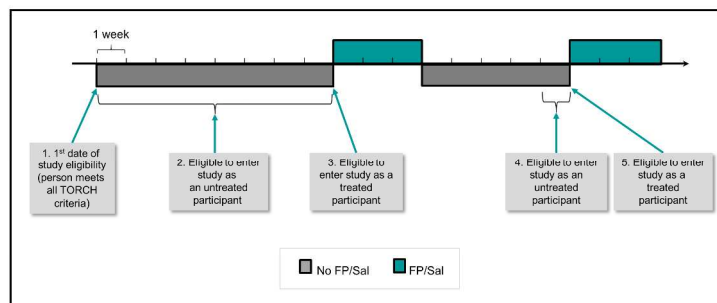

Figure 3: Example timeline for a person in CPRD who is eligible for participation in Objective 1, illustrating multiple periods of unexposed/exposed (FL/SAL untreated/treated) eligibility.

338x190mm (300 x 300 DPI)

review only

## Overview of algorithms to be used for detecting COPD, COPD exacerbations and pneumonia

| Condition         | Paper (author, year)              | Algorithm description <sup>1</sup>                                                                                                                                                                                                                                                                                                   | Validity <sup>2</sup>                            | Other notes                                                                                                                                                                                                                                                                            |
|-------------------|-----------------------------------|--------------------------------------------------------------------------------------------------------------------------------------------------------------------------------------------------------------------------------------------------------------------------------------------------------------------------------------|--------------------------------------------------|----------------------------------------------------------------------------------------------------------------------------------------------------------------------------------------------------------------------------------------------------------------------------------------|
| COPD              | Quint et al, 2014 <sup>10</sup>   | - CPRD <sup>3</sup> diagnostic (Read) code for COPD                                                                                                                                                                                                                                                                                  | PPV <sup>4</sup> : 87% (78 – 92)                 | <ol style="list-style-type: none"> <li>1. Comparison with gold standard of respiratory physician review of information obtained by questionnaire from GPs</li> <li>2. 8 algorithms presented in total, PPVs ranging from 12 to 89</li> </ol>                                           |
| COPD exacerbation | Rothnie et al, 2016 <sup>12</sup> | - CPRD diagnostic (Read) code for LRTI or Acute Exacerbation COPD (AECOPD) <b>OR</b><br>- A prescription of a COPD-specific antibiotic combined with OCS for 5-14 days <b>OR</b><br>- A record (Read code) of two or more respiratory symptoms of AECOPD with a prescription of COPD-specific antibiotics and/or OCS on the same day | PPV: 86% (83 – 88)<br>Sensitivity: 63% (55 – 70) | <ol style="list-style-type: none"> <li>1. Comparison with gold standard of respiratory physician review of information obtained by questionnaire from GPs</li> <li>2. 15 algorithms presented in total, PPVs ranging from 61% – 100%, sensitivities ranging from 1.6% – 63%</li> </ol> |
| Pneumonia         | Millet et al, 2013 <sup>11</sup>  | - CPRD diagnostic (Read) codes and HES <sup>5</sup> diagnostic (ICD-10) codes for pneumonia (identified as a subset of an initial search for LRTI codes)<br>- Records in both database within the 28 days considered the same illness-episode                                                                                        | No validation performed                          |                                                                                                                                                                                                                                                                                        |

**Note 1:** Main algorithm presented in article and to be applied initially in COPD medications real-world effects study (details on other algorithms presented in paper provided in the “Other notes” column where appropriate). **Note 2:** Validity=measure of validity presented in article:result obtained (95% CI). **Note 3:** CPRD=UK Clinical Practice Research Datalink **Note 4:** PPV=positive predictive value **Note 5:** HES=Hospital Episode Statistics

## LAMA codes

| Product code | BNF header                           | Drug substance                            | Drug product                                                                                           |
|--------------|--------------------------------------|-------------------------------------------|--------------------------------------------------------------------------------------------------------|
| 61176        | compound bronchodilator preparations | vilanterol trifenate/umeclidinium bromide | anoro ellipta 55micrograms/dose / 22micrograms/dose dry powder inhaler (glaxosmithkline uk ltd)        |
| 61490        | compound bronchodilator preparations |                                           | umeclidinium bromide 65micrograms/dose / vilanterol 22micrograms/dose dry powder inhaler               |
| 35014        | antimuscarinic bronchodilators       | tiotropium bromide monohydrate            | tiotropium bromide 18microgram inhalation powder capsules with device                                  |
| 6474         | antimuscarinics                      | glycopyrronium bromide                    | robinul 1mg tablet (idis world medicines)                                                              |
| 50577        | antimuscarinic bronchodilators       | tiotropium bromide                        | spiriva 18microgram inhalation powder capsules with handihaler (de pharmaceuticals)                    |
| 35011        | antimuscarinic bronchodilators       | tiotropium bromide monohydrate            | tiotropium bromide 18microgram inhalation powder capsules                                              |
| 49227        | antimuscarinic bronchodilators       |                                           | aclidinium bromide 375micrograms/dose dry powder inhaler                                               |
| 50103        | antimuscarinic bronchodilators       |                                           | spiriva 18microgram inhalation powder capsules with handihaler (waymade healthcare plc)                |
| 7908         | antimuscarinics                      | glycopyrronium bromide                    | robinul 2mg tablet (wyeth pharmaceuticals)                                                             |
| 59638        | antimuscarinic bronchodilators       |                                           | spiriva 18microgram inhalation powder capsules with handihaler (sigma pharmaceuticals plc)             |
| 51967        | antimuscarinic bronchodilators       | tiotropium bromide                        | spiriva 18microgram inhalation powder capsules (mawdsley-brooks & company ltd)                         |
| 53982        | antimuscarinic bronchodilators       |                                           | seebri breezhaler 44microgram inhalation powder capsules with device (novartis pharmaceuticals uk ltd) |
| 6050         | antimuscarinic bronchodilators       | tiotropium bromide                        | spiriva 18 microgram capsule (boehringer ingelheim ltd)                                                |
| 7597         | other ulcer healing drugs            | glycopyrronium bromide                    | glycopyrronium bromide 2mg tablets                                                                     |
| 49228        | antimuscarinic bronchodilators       |                                           | eklira 322micrograms/dose genuair (almirall ltd)                                                       |
| 59173        | other ulcer healing drugs            | glycopyrronium bromide                    | glycopyrronium bromide 200micrograms/5ml oral suspension                                               |

| Product code | BNF header                     | Drug substance         | Drug product                                                                                                 |
|--------------|--------------------------------|------------------------|--------------------------------------------------------------------------------------------------------------|
| 36864        | antimuscarinic bronchodilators | tiotropium bromide     | tiotropium bromide 2.5micrograms/dose solution for inhalation cartridge with device cfc free                 |
| 55911        | other ulcer healing drugs      | glycopyrronium bromide | glycopyrronium bromide 500micrograms/5ml oral solution                                                       |
| 34995        | antimuscarinic bronchodilators | tiotropium bromide     | spiriva 18microgram inhalation powder capsules with handihaler (boehringer ingelheim ltd)                    |
| 35000        | antimuscarinic bronchodilators | tiotropium bromide     | spiriva 18microgram inhalation powder capsules (boehringer ingelheim ltd)                                    |
| 29138        | other ulcer healing drugs      | glycopyrronium bromide | glycopyrronium bromide 1mg/5ml oral solution                                                                 |
| 47269        | other ulcer healing drugs      | glycopyrronium bromide | glycopyrronium bromide 1mg/5ml oral suspension                                                               |
| 54151        | other ulcer healing drugs      | glycopyrronium bromide | glycopyrronium bromide 600micrograms/5ml oral suspension                                                     |
| 55795        | other ulcer healing drugs      | glycopyrronium bromide | glycopyrronium bromide 500micrograms/5ml oral suspension                                                     |
| 38377        | other ulcer healing drugs      | glycopyrronium bromide | glycopyrronium bromide 2mg/5ml oral solution                                                                 |
| 7218         | other ulcer healing drugs      | glycopyrronium bromide | glycopyrronium bromide 1mg tablets                                                                           |
| 36869        | antimuscarinic bronchodilators | tiotropium bromide     | spiriva respimat 2.5micrograms/dose solution for inhalation cartridge with device (boehringer ingelheim ltd) |
| 62109        | antimuscarinic bronchodilators |                        | umeclidinium bromide 65micrograms/dose dry powder inhaler                                                    |
| 50292        | antimuscarinic bronchodilators |                        | spiriva 18microgram inhalation powder capsules (sigma pharmaceuticals plc)                                   |
| 55794        | other ulcer healing drugs      | glycopyrronium bromide | glycopyrronium bromide 5mg/5ml oral suspension                                                               |
| 50047        | other ulcer healing drugs      | glycopyrronium bromide | glycopyrronium bromide 5mg/5ml oral solution                                                                 |
| 56262        | other ulcer healing drugs      | glycopyrronium bromide | glycopyrronium bromide 200micrograms/5ml oral solution                                                       |
| 61879        | antimuscarinic bronchodilators |                        | incuse ellipta 55micrograms/dose dry powder inhaler (glaxosmithkline uk ltd)                                 |
| 53761        | antimuscarinic bronchodilators |                        | glycopyrronium bromide 55microgram inhalation powder capsules with device                                    |
| 746          | antimuscarinic bronchodilators | tiotropium bromide     | tiotropium 18 microgram capsule                                                                              |
| 38538        | other ulcer healing drugs      | glycopyrronium bromide | glycopyrronium bromide 2mg/5ml oral suspension                                                               |
| 46214        | antimuscarinics                | glycopyrronium bromide | glycopyrronium bromide 5mg/5ml oral solution                                                                 |

| Product code | BNF header                     | Drug substance     | Drug product                                                                                               |
|--------------|--------------------------------|--------------------|------------------------------------------------------------------------------------------------------------|
| 61582        | antimuscarinic bronchodilators | tiotropium bromide | spiriva respimat 2.5micrograms/dose solution for inhalation cartridge with device (waymade healthcare plc) |

## LABA codes

| Product code | BNF header                                | Drug substance                | Drug product                                                                                 |
|--------------|-------------------------------------------|-------------------------------|----------------------------------------------------------------------------------------------|
| 45610        | selective beta 2 agonists                 | indacaterol maleate           | indacaterol 300microgram inhalation powder capsules with device                              |
| 7270         | selective beta 2 agonists                 | salmeterol xinafoate          | salmeterol 25micrograms/dose inhaler cfc free                                                |
| 10968        | selective beta 2 agonists                 | formoterol fumarate dihydrate | foradil 12microgram inhalation powder capsules with device (novartis pharmaceuticals uk ltd) |
| 549          | unknown                                   | salmeterol xinafoate          | serevent 25micrograms/dose inhaler (glaxosmithkline uk ltd)                                  |
| 7133         | selective beta 2 agonists                 | formoterol fumarate dihydrate | formoterol 12micrograms/dose dry powder inhaler                                              |
| 54742        | selective beta 2 agonists                 | salmeterol xinafoate          | salmeterol 25micrograms/dose inhaler cfc free (a a h pharmaceuticals ltd)                    |
| 719          | selective beta 2 agonists                 | salmeterol xinafoate          | salmeterol 50micrograms/dose dry powder inhaler                                              |
| 57694        | selective beta 2 agonists                 | salmeterol xinafoate          | vertine 25micrograms/dose inhaler cfc free (teva uk ltd)                                     |
| 26829        | selective beta 2 agonists                 | tulobuterol                   | brelomax 2mg tablet (abbott laboratories ltd)                                                |
| 19799        | selective beta 2 agonists                 | tulobuterol                   | tulobuterol 2mg                                                                              |
| 56482        | selective beta 2 agonists                 | formoterol fumarate dihydrate | oxis 12 turbohaler (waymade healthcare plc)                                                  |
| 25784        | selective beta 2 agonists                 | formoterol fumarate dihydrate | atimos modulite 12micrograms/dose inhaler (chiesi ltd)                                       |
| 47638        | selective beta 2 agonists                 | salmeterol xinafoate          | neevent 25micrograms/dose inhaler cfc free (kent pharmaceuticals ltd)                        |
| 10672        | peripheral vasodilators and related drugs | moxisylyte hydrochloride      | opilon 40mg tablet (concord pharmaceuticals ltd)                                             |
| 50051        | selective beta 2 agonists                 | salmeterol xinafoate          | serevent 25micrograms/dose evohaler (waymade healthcare plc)                                 |
| 35725        | selective beta 2 agonists                 | formoterol fumarate dihydrate | formoterol easyhaler 12micrograms/dose dry powder inhaler (orion pharma (uk) ltd)            |

| Product code | BNF header                                | Drug substance                | Drug product                                                                                            |
|--------------|-------------------------------------------|-------------------------------|---------------------------------------------------------------------------------------------------------|
| 2224         | selective beta 2 agonists                 | salmeterol xinafoate          | serevent 50micrograms/dose accuhaler (glaxosmithkline uk ltd)                                           |
| 43893        | selective beta 2 agonists                 | indacaterol maleate           | onbrez breezhaler 150microgram inhalation powder capsules with device (novartis pharmaceuticals uk ltd) |
| 6526         | selective beta 2 agonists                 | formoterol fumarate dihydrate | formoterol 12microgram inhalation powder capsules with device                                           |
| 43738        | selective beta 2 agonists                 | indacaterol maleate           | indacaterol 150microgram inhalation powder capsules with device                                         |
| 35825        | selective beta 2 agonists                 | salmeterol xinafoate          | serevent 50microgram disks (glaxosmithkline uk ltd)                                                     |
| 43764        | peripheral vasodilators and related drugs | moxisylyte hydrochloride      | opilon 40mg tablets (archimedes pharma uk ltd)                                                          |
| 56478        | selective beta 2 agonists                 | salmeterol xinafoate          | serevent 50micrograms/dose accuhaler (de pharmaceuticals)                                               |
| 42103        | selective beta 2 agonists                 | tulobuterol                   | tulobuterol 1mg/5ml sugar free syrup                                                                    |
| 57544        | selective beta 2 agonists                 | salmeterol xinafoate          | serevent 50micrograms/dose accuhaler (waymade healthcare plc)                                           |
| 3297         | selective beta 2 agonists                 | salmeterol xinafoate          | salmeterol 50micrograms disc                                                                            |
| 57558        | selective beta 2 agonists                 | formoterol fumarate dihydrate | oxis 6 turbohaler (lexon (uk) ltd)                                                                      |
| 9711         | selective beta 2 agonists                 | formoterol fumarate dihydrate | formoterol 6micrograms/dose dry powder inhaler                                                          |
| 35542        | selective beta 2 agonists                 | salmeterol xinafoate          | salmeterol 50microgram inhalation powder blisters with device                                           |
| 465          | unknown                                   | salmeterol xinafoate          | salmeterol 25micrograms/dose inhaler                                                                    |
| 44064        | selective beta 2 agonists                 | indacaterol maleate           | onbrez breezhaler 300microgram inhalation powder capsules with device (novartis pharmaceuticals uk ltd) |
| 35165        | selective beta 2 agonists                 | salmeterol xinafoate          | serevent 50microgram disks with diskhaler (glaxosmithkline uk ltd)                                      |
| 14306        | selective beta 2 agonists                 | formoterol fumarate dihydrate | formoterol 12micrograms/dose inhaler cfc free                                                           |
| 1974         | selective beta 2 agonists                 | formoterol fumarate dihydrate | oxis 12 turbohaler (astrazeneca uk ltd)                                                                 |
| 7268         | selective beta 2 agonists                 | salmeterol xinafoate          | serevent 25micrograms/dose evohaler (glaxosmithkline uk ltd)                                            |
| 8365         | peripheral vasodilators and related drugs | moxisylyte hydrochloride      | moxisylyte 40mg tablets                                                                                 |
| 35503        | selective beta 2 agonists                 | salmeterol xinafoate          | salmeterol 50microgram inhalation powder blisters                                                       |
| 1975         | selective beta 2 agonists                 | formoterol fumarate dihydrate | oxis 6 turbohaler (astrazeneca uk ltd)                                                                  |
| 22663        | selective beta 2 agonists                 | tulobuterol                   | respacal 2mg tablet (ucb pharma ltd)                                                                    |



| Product code | BNF header                | Drug substance       | Drug product                                                             |
|--------------|---------------------------|----------------------|--------------------------------------------------------------------------|
| 910          | selective beta 2 agonists | salmeterol xinafoate | serevent diskhaler 50microgram inhalation powder (glaxo wellcome uk ltd) |

For peer review only

## ICS codes

| Product code | BNF header                                   | Drug substance             | Drug product                                                                     |
|--------------|----------------------------------------------|----------------------------|----------------------------------------------------------------------------------|
| 54399        | corticosteroids (for respiratory conditions) | beclometasone dipropionate | qvar 100 autohaler (sigma pharmaceuticals plc)                                   |
| 959          | unknown                                      | budesonide                 | budesonide 50micrograms/dose inhaler                                             |
| 2951         | corticosteroids (for respiratory conditions) | fluticasone propionate     | fluticasone 250microgram/actuation pressurised inhalation                        |
| 50129        | corticosteroids (for respiratory conditions) | beclometasone dipropionate | qvar 100micrograms/dose easi-breathe inhaler (de pharmaceuticals)                |
| 2229         | corticosteroids (for respiratory conditions) | beclometasone dipropionate | becodisks 100microgram disc (allen & hanburys ltd)                               |
| 3989         | corticosteroids (for respiratory conditions) | fluticasone propionate     | flixtotide 100microgram disc (allen & hanburys ltd)                              |
| 5551         | corticosteroids (for respiratory conditions) | fluticasone propionate     | flixtotide 0.5mg/2ml nebulas (glaxosmithkline uk ltd)                            |
| 34794        | corticosteroids (for respiratory conditions) | beclometasone dipropionate | beclometasone 200micrograms/dose inhaler (a a h pharmaceuticals ltd)             |
| 41269        | corticosteroids (for respiratory conditions) | beclometasone dipropionate | beclometasone 400 cyclocaps (teva uk ltd)                                        |
| 29325        | corticosteroids (for respiratory conditions) | beclometasone dipropionate | beclometasone 250micrograms/dose inhaler (generics (uk) ltd)                     |
| 4499         | corticosteroids (for respiratory conditions) | beclometasone dipropionate | aerobec 250microgram/actuation pressurised inhalation (meda pharmaceuticals ltd) |
| 57589        | corticosteroids (for respiratory conditions) | beclometasone dipropionate | becloforte 250micrograms/dose inhaler (dowelhurst ltd)                           |
| 32874        | corticosteroids (for respiratory conditions) | beclometasone dipropionate | beclometasone 50microgram/actuation inhalation powder (actavis uk ltd)           |
| 2159         | corticosteroids (for respiratory conditions) | beclometasone dipropionate | aerobec 50 autohaler (meda pharmaceuticals ltd)                                  |
| 14590        | corticosteroids (for respiratory conditions) | beclometasone dipropionate | asmabec 250microgram/actuation spacehaler (celltech pharma europe ltd)           |
| 1725         | corticosteroids (for respiratory conditions) | beclometasone dipropionate | beclazone 50 easi-breathe inhaler (teva uk ltd)                                  |
| 908          | corticosteroids (for respiratory conditions) | budesonide                 | pulmicort 400 turbohaler (astrazeneca uk ltd)                                    |
| 35288        | corticosteroids (for respiratory conditions) | beclometasone dipropionate | beclometasone 400microgram inhalation powder blisters                            |
| 49367        | corticosteroids (for respiratory conditions) | beclometasone dipropionate | clenil modulite 50micrograms/dose inhaler (mawdsley-brooks & company ltd)        |
| 35107        | corticosteroids (for respiratory conditions) | beclometasone dipropionate | beclometasone 400microgram inhalation powder blisters with device                |

| Product code | BNF header                                   | Drug substance             | Drug product                                                                           |
|--------------|----------------------------------------------|----------------------------|----------------------------------------------------------------------------------------|
| 1676         | corticosteroids (for respiratory conditions) | fluticasone propionate     | flixtide 125microgram/actuation inhalation powder (allen & hanburys ltd)               |
| 49772        | corticosteroids (for respiratory conditions) | fluticasone propionate     | fluticasone 250micrograms/dose evohaler (sigma pharmaceuticals plc)                    |
| 48088        | unknown                                      | budesonide                 | budenofalk 9mg gastro-resistant granules sachets (dr. falk pharma uk ltd)              |
| 33258        | corticosteroids (for respiratory conditions) | beclometasone dipropionate | beclometasone 250micrograms/dose inhaler (a a h pharmaceuticals ltd)                   |
| 13037        | corticosteroids (for respiratory conditions) | beclometasone dipropionate | pulvinal beclometasone dipropionate 200micrograms/dose dry powder inhaler (chiesi ltd) |
| 19031        | corticosteroids (for respiratory conditions) | beclometasone dipropionate | bdp 100microgram/actuation spacehaler (celltech pharma europe ltd)                     |
| 16158        | corticosteroids (for respiratory conditions) | beclometasone dipropionate | clenil modulite 50micrograms/dose inhaler (chiesi ltd)                                 |
| 2124         | unknown                                      |                            | pulmicort refill 200 mcg inh                                                           |
| 4759         | corticosteroids (for respiratory conditions) | beclometasone dipropionate | beclometasone 100microgram inhalation powder capsules                                  |
| 3753         | unknown                                      |                            | flixtide diskhaler-community pack 250 mcg                                              |
| 49711        | corticosteroids (for respiratory conditions) | budesonide                 | pulmicort 200micrograms/dose inhaler (astrazeneca uk ltd)                              |
| 15326        | corticosteroids (for respiratory conditions) | beclometasone dipropionate | beclometasone 100micrograms/dose inhaler cfc free                                      |
| 2335         | corticosteroids (for respiratory conditions) | beclometasone dipropionate | qvar 100 inhaler (teva uk ltd)                                                         |
| 5580         | corticosteroids (for respiratory conditions) | fluticasone propionate     | flixtide accuhaler 50 50microgram/inhalation inhalation powder (allen & hanburys ltd)  |
| 51681        | corticosteroids (for respiratory conditions) | beclometasone dipropionate | qvar 100 inhaler (sigma pharmaceuticals plc)                                           |
| 8433         | corticosteroids (for respiratory conditions) | budesonide                 | budesonide 100micrograms/actuation inhaler                                             |
| 9577         | corticosteroids (for respiratory conditions) | beclometasone dipropionate | asmabec 50 clickhaler (focus pharmaceuticals ltd)                                      |
| 2723         | corticosteroids (for respiratory conditions) | fluticasone propionate     | fluticasone 25micrograms/dose inhaler                                                  |
| 23675        | unknown                                      |                            | pulmicort l.s. refill                                                                  |
| 35638        | corticosteroids (for respiratory conditions) | fluticasone propionate     | fluticasone propionate 100microgram inhalation powder blisters with device             |
| 9571         | corticosteroids (for respiratory conditions) | beclometasone dipropionate | beclometasone 250micrograms/actuation vortex inhaler                                   |
| 51234        | corticosteroids (for respiratory conditions) | beclometasone dipropionate | qvar 100 inhaler (waymade healthcare plc)                                              |

| Product code | BNF header                                   | Drug substance             | Drug product                                                                           |
|--------------|----------------------------------------------|----------------------------|----------------------------------------------------------------------------------------|
| 60946        | corticosteroids (in chronic bowel disorders) | budesonide                 | entocort cr 3mg capsules (waymade healthcare plc)                                      |
| 5223         | corticosteroids (for respiratory conditions) | fluticasone propionate     | fluticasone 50micrograms/dose inhaler cfc free                                         |
| 53057        | corticosteroids (for respiratory conditions) | fluticasone propionate     | flixtide 50micrograms/dose evohaler (lexon (uk) ltd)                                   |
| 13290        | corticosteroids (for respiratory conditions) | beclometasone dipropionate | clenil modulite 100micrograms/dose inhaler (chiesi ltd)                                |
| 42928        | corticosteroids (for respiratory conditions) | fluticasone propionate     | flixtide 100micrograms/dose accuhaler (glaxosmithkline uk ltd)                         |
| 14736        | corticosteroids (for respiratory conditions) | beclometasone dipropionate | pulvinal beclometasone dipropionate 400micrograms/dose dry powder inhaler (chiesi ltd) |
| 52806        | corticosteroids (for respiratory conditions) | beclometasone dipropionate | qvar 100 autohaler (lexon (uk) ltd)                                                    |
| 57525        | corticosteroids (for respiratory conditions) | fluticasone propionate     | flixtide 250micrograms/dose accuhaler (stephar (u.k.) ltd)                             |
| 33849        | corticosteroids (for respiratory conditions) | beclometasone dipropionate | beclometasone 100microgram/actuation inhalation powder (neo laboratories ltd)          |
| 52732        | corticosteroids (for respiratory conditions) | budesonide                 | pulmicort 0.5mg respules (necessity supplies ltd)                                      |
| 35611        | corticosteroids (for respiratory conditions) | fluticasone propionate     | flixtide 250microgram disks (glaxosmithkline uk ltd)                                   |
| 8111         | corticosteroids (for respiratory conditions) | beclometasone dipropionate | becloforte vm 250microgram/actuation vm pack (allen & hanburys ltd)                    |
| 39879        | unknown                                      | budesonide                 | budesonide 200micrograms/dose inhaler cfc free                                         |
| 1242         | corticosteroids (for respiratory conditions) | beclometasone dipropionate | beclometasone 250micrograms/dose inhaler                                               |
| 26665        | unknown                                      |                            | pulmicort complete                                                                     |
| 37447        | corticosteroids (for respiratory conditions) | fluticasone propionate     | fluticasone propionate 50microgram inhalation powder blisters                          |
| 5718         | corticosteroids (for respiratory conditions) | fluticasone propionate     | flixtide 125micrograms/dose evohaler (glaxosmithkline uk ltd)                          |
| 7653         | corticosteroids (for respiratory conditions) | beclometasone dipropionate | beclometasone 400microgram inhalation powder capsules                                  |
| 28640        | corticosteroids (for respiratory conditions) | beclometasone dipropionate | beclometasone 100microgram/actuation inhalation powder (actavis uk ltd)                |
| 4365         | corticosteroids (for respiratory conditions) | beclometasone dipropionate | beclometasone 100micrograms disc                                                       |
| 34739        | corticosteroids (for respiratory conditions) | beclometasone dipropionate | beclometasone 50micrograms/dose inhaler (teva uk ltd)                                  |
| 8635         | corticosteroids (for respiratory conditions) | fluticasone propionate     | flixtide 50microgram disc (allen & hanburys ltd)                                       |

| Product code | BNF header                                   | Drug substance             | Drug product                                                                       |
|--------------|----------------------------------------------|----------------------------|------------------------------------------------------------------------------------|
| 57579        | corticosteroids (for respiratory conditions) | fluticasone propionate     | flixtotide 50micrograms/dose accuhaler (de pharmaceuticals)                        |
| 4413         | corticosteroids (for respiratory conditions) | beclometasone dipropionate | qvar 100 autohaler (teva uk ltd)                                                   |
| 37203        | corticosteroids (in chronic bowel disorders) | beclometasone dipropionate | beclometasone 5mg gastro-resistant modified-release tablets                        |
| 4132         | corticosteroids (for respiratory conditions) | fluticasone propionate     | fluticasone 125microgram/actuation pressurised inhalation                          |
| 3018         | corticosteroids (for respiratory conditions) | beclometasone dipropionate | beclometasone 50micrograms/dose inhaler                                            |
| 9233         | corticosteroids (for respiratory conditions) | beclometasone dipropionate | beclometasone 200microgram inhalation powder capsules                              |
| 2160         | corticosteroids (for respiratory conditions) | beclometasone dipropionate | beclometasone 50micrograms/dose breath actuated inhaler                            |
| 2148         | corticosteroids (for respiratory conditions) | beclometasone dipropionate | beclometasone 400microgram disc                                                    |
| 34919        | corticosteroids (for respiratory conditions) | beclometasone dipropionate | beclometasone 50micrograms/dose inhaler (a a h pharmaceuticals ltd)                |
| 2092         | corticosteroids (for respiratory conditions) | budesonide                 | budesonide 200micrograms/dose dry powder inhaler                                   |
| 21005        | corticosteroids (for respiratory conditions) | beclometasone dipropionate | beclometasone 250micrograms/dose inhaler cfc free                                  |
| 10090        | corticosteroids (for respiratory conditions) | beclometasone dipropionate | beclometasone 50micrograms/actuation extrafine particle cfc free inhaler           |
| 1551         | corticosteroids (for respiratory conditions) | beclometasone dipropionate | beclazone 250 inhaler (teva uk ltd)                                                |
| 39067        | corticosteroids (in chronic bowel disorders) | beclometasone dipropionate | clipper 5mg gastro-resistant modified-release tablets (chiesi ltd)                 |
| 51415        | corticosteroids (for respiratory conditions) | beclometasone dipropionate | qvar 50 inhaler (mawdsley-brooks & company ltd)                                    |
| 35106        | corticosteroids (for respiratory conditions) | beclometasone dipropionate | becodisks 100microgram with diskhaler (glaxosmithkline uk ltd)                     |
| 35299        | corticosteroids (for respiratory conditions) | beclometasone dipropionate | becodisks 400microgram (glaxosmithkline uk ltd)                                    |
| 54207        | corticosteroids (for respiratory conditions) | beclometasone dipropionate | qvar 50 inhaler (de pharmaceuticals)                                               |
| 3927         | corticosteroids (for respiratory conditions) | beclometasone dipropionate | filair 100 inhaler (meda pharmaceuticals ltd)                                      |
| 17670        | corticosteroids (for respiratory conditions) | budesonide                 | easyhaler budesonide 100micrograms/dose dry powder inhaler (orion pharma (uk) ltd) |
| 883          | corticosteroids (for respiratory conditions) | beclometasone dipropionate | becodisks 200microgram disc (allen & hanburys ltd)                                 |
| 8450         | unknown                                      |                            | flixtotide diskhaler-community pack 50 mcg                                         |
| 3289         | corticosteroids (for respiratory conditions) | fluticasone propionate     | flixtotide 25micrograms/dose inhaler (glaxosmithkline uk ltd)                      |

| Product code | BNF header                                   | Drug substance             | Drug product                                                                                              |
|--------------|----------------------------------------------|----------------------------|-----------------------------------------------------------------------------------------------------------|
| 53480        | corticosteroids (for respiratory conditions) | beclometasone dipropionate | qvar 100 autohaler (stephar (u.k.) ltd)                                                                   |
| 39102        | unknown                                      | budesonide                 | budesonide 100micrograms/dose inhaler cfc free                                                            |
| 20763        | unknown                                      |                            | becloforte                                                                                                |
| 35374        | corticosteroids (for respiratory conditions) | fluticasone propionate     | flixtide 500microgram disks (glaxosmithkline uk ltd)                                                      |
| 39200        | corticosteroids (for respiratory conditions) | beclometasone dipropionate | aerobec forte 250 autohaler (meda pharmaceuticals ltd)                                                    |
| 9599         | corticosteroids (for respiratory conditions) | beclometasone dipropionate | beclazone 50microgram/actuation inhalation powder (actavis uk ltd)                                        |
| 5804         | corticosteroids (for respiratory conditions) | beclometasone dipropionate | beclometasone 250micrograms/dose dry powder inhaler                                                       |
| 47943        | corticosteroids (for respiratory conditions) | beclometasone dipropionate | beclazone easi-breathe (roi) 100microgram/actuation pressurised inhalation (ivax pharmaceuticals ireland) |
| 5683         | corticosteroids (for respiratory conditions) | fluticasone propionate     | flixtide 250micrograms/dose evohaler (glaxosmithkline uk ltd)                                             |
| 48340        | corticosteroids (for respiratory conditions) | beclometasone dipropionate | clenil modulite 100micrograms/dose inhaler (mawdsley-brooks & company ltd)                                |
| 1885         | corticosteroids (for respiratory conditions) | beclometasone dipropionate | beclazone 200 inhaler (teva uk ltd)                                                                       |
| 911          | corticosteroids (for respiratory conditions) | fluticasone propionate     | flixtide accuhaler 250 250microgram/inhalation inhalation powder (allen & hanburys ltd)                   |
| 6095         | corticosteroids (in chronic bowel disorders) | budesonide                 | budesonide 3mg gastro-resistant capsules                                                                  |
| 28073        | corticosteroids (for respiratory conditions) | beclometasone dipropionate | beclometasone 250microgram/actuation pressurised inhalation (approved prescription services ltd)          |
| 4131         | corticosteroids (for respiratory conditions) | fluticasone propionate     | fluticasone 100microgram disc                                                                             |
| 43074        | corticosteroids (for respiratory conditions) | fluticasone propionate     | flixtide 500micrograms/dose accuhaler (glaxosmithkline uk ltd)                                            |
| 35905        | corticosteroids (for respiratory conditions) | fluticasone propionate     | fluticasone propionate 250microgram inhalation powder blisters                                            |
| 27583        | unknown                                      |                            | pulmicort                                                                                                 |
| 17654        | corticosteroids (for respiratory conditions) | beclometasone dipropionate | easyhaler beclometasone 200micrograms/dose dry powder inhaler (orion pharma (uk) ltd)                     |
| 4545         | corticosteroids (for respiratory conditions) | budesonide                 | pulmicort ls 50microgram refill canister (astrazeneca uk ltd)                                             |
| 1412         | corticosteroids (for respiratory conditions) | fluticasone propionate     | flixtide 250microgram/actuation inhalation powder (allen & hanburys ltd)                                  |

| Product code | BNF header                                   | Drug substance             | Drug product                                                                            |
|--------------|----------------------------------------------|----------------------------|-----------------------------------------------------------------------------------------|
| 3363         | corticosteroids (for respiratory conditions) | beclometasone dipropionate | becloforte 400microgram disks with diskhaler (glaxosmithkline uk ltd)                   |
| 36462        | corticosteroids (for respiratory conditions) | fluticasone propionate     | fluticasone propionate 500microgram inhalation powder blisters                          |
| 56471        | corticosteroids (for respiratory conditions) | beclometasone dipropionate | becodisks 200microgram (mawdsley-brooks & company ltd)                                  |
| 14294        | corticosteroids (for respiratory conditions) | beclometasone dipropionate | qvar 50micrograms/dose easi-breathe inhaler (teva uk ltd)                               |
| 3570         | corticosteroids (for respiratory conditions) | budesonide                 | budesonide 200micrograms/actuation refill canister                                      |
| 9164         | corticosteroids (for respiratory conditions) | fluticasone propionate     | fluticasone propionate 50micrograms/dose dry powder inhaler                             |
| 27188        | corticosteroids (for respiratory conditions) | budesonide                 | easyhaler budesonide 200micrograms/dose dry powder inhaler (orion pharma (uk) ltd)      |
| 39099        | unknown                                      | budesonide                 | pulmicort 100micrograms/dose inhaler cfc free (astrazeneca uk ltd)                      |
| 4926         | corticosteroids (for respiratory conditions) | fluticasone propionate     | flixtide accuhaler 100 100microgram/inhalation inhalation powder (allen & hanburys ltd) |
| 1642         | corticosteroids (for respiratory conditions) | budesonide                 | budesonide 400micrograms/dose dry powder inhaler                                        |
| 34859        | corticosteroids (for respiratory conditions) | beclometasone dipropionate | beclometasone 250microgram/actuation inhalation powder (neo laboratories ltd)           |
| 16054        | corticosteroids (for respiratory conditions) | budesonide                 | budesonide 200micrograms/actuation breath actuated powder inhaler                       |
| 960          | corticosteroids (for respiratory conditions) | budesonide                 | pulmicort 100 turbohaler (astrazeneca uk ltd)                                           |
| 51480        | corticosteroids (for respiratory conditions) | beclometasone dipropionate | qvar 100 autohaler (de pharmaceuticals)                                                 |
| 7891         | corticosteroids (for respiratory conditions) | fluticasone propionate     | fluticasone 500microgram disc                                                           |
| 56462        | corticosteroids (for respiratory conditions) | beclometasone dipropionate | becodisks 400microgram (waymade healthcare plc)                                         |
| 7638         | corticosteroids (for respiratory conditions) | fluticasone propionate     | fluticasone 250microgram disc                                                           |
| 15706        | corticosteroids (for respiratory conditions) | beclometasone dipropionate | beclometasone 100 micrograms/actuation vortex inhaler                                   |
| 27915        | unknown                                      |                            | fluticasone prop disk refill                                                            |
| 2893         | corticosteroids (for respiratory conditions) | beclometasone dipropionate | beclometasone 200micrograms disc                                                        |
| 5885         | corticosteroids (for respiratory conditions) | fluticasone propionate     | fluticasone propionate 100micrograms/dose dry powder inhaler                            |

| Product code | BNF header                                   | Drug substance             | Drug product                                                                                 |
|--------------|----------------------------------------------|----------------------------|----------------------------------------------------------------------------------------------|
| 3898         | corticosteroids (in chronic bowel disorders) | budesonide                 | budesonide 3mg gastro-resistant modified-release capsules                                    |
| 3546         | corticosteroids (for respiratory conditions) | beclometasone dipropionate | qvar 50 inhaler (teva uk ltd)                                                                |
| 30210        | corticosteroids (for respiratory conditions) | beclometasone dipropionate | beclometasone 250micrograms/dose inhaler (teva uk ltd)                                       |
| 1552         | corticosteroids (for respiratory conditions) | beclometasone dipropionate | becloforte easi-breathe 250microgram/actuation pressurised inhalation (allen & hanburys ltd) |
| 5822         | corticosteroids (for respiratory conditions) | fluticasone propionate     | fluticasone 250micrograms/dose inhaler cfc free                                              |
| 35430        | corticosteroids (for respiratory conditions) | beclometasone dipropionate | becodisks 200microgram with diskhaler (glaxosmithkline uk ltd)                               |
| 42994        | corticosteroids (for respiratory conditions) | fluticasone propionate     | flixitide 250micrograms/dose accuhaler (glaxosmithkline uk ltd)                              |
| 36290        | corticosteroids (for respiratory conditions) | fluticasone propionate     | flixitide 50microgram disks with diskhaler (glaxosmithkline uk ltd)                          |
| 24898        | corticosteroids (for respiratory conditions) | beclometasone dipropionate | spacehaler bdp 100microgram/actuation spacehaler (celltech pharma europe ltd)                |
| 35700        | corticosteroids (for respiratory conditions) | fluticasone propionate     | fluticasone propionate 500microgram inhalation powder blisters with device                   |
| 3188         | unknown                                      |                            | pulmicort complete 50 mcg inh                                                                |
| 7788         | corticosteroids (for respiratory conditions) | budesonide                 | budesonide 100micrograms/dose dry powder inhaler                                             |
| 35293        | corticosteroids (for respiratory conditions) | beclometasone dipropionate | beclometasone 200microgram inhalation powder blisters with device                            |
| 8251         | unknown                                      |                            | pulmicort refill 50 mg inh                                                                   |
| 1259         | corticosteroids (for respiratory conditions) | beclometasone dipropionate | beclometasone 200micrograms/dose inhaler                                                     |
| 16525        | corticosteroids (in chronic bowel disorders) | budesonide                 | budenofalk 3mg gastro-resistant capsules (dr. falk pharma uk ltd)                            |
| 1680         | corticosteroids (for respiratory conditions) | budesonide                 | pulmicort ls 50micrograms/dose inhaler (astrazeneca uk ltd)                                  |
| 10254        | corticosteroids (for respiratory conditions) | mometasone furoate         | mometasone 400micrograms/dose dry powder inhaler                                             |
| 20812        | unknown                                      |                            | pulmicort refill                                                                             |
| 14524        | corticosteroids (for respiratory conditions) | beclometasone dipropionate | bdp 250microgram/actuation spacehaler (celltech pharma europe ltd)                           |
| 2992         | corticosteroids (for respiratory conditions) | beclometasone dipropionate | beclazone 50 inhaler (teva uk ltd)                                                           |
| 7602         | corticosteroids (for respiratory conditions) | fluticasone propionate     | fluticasone 50microgram disc                                                                 |



| Product code | BNF header                                   | Drug substance             | Drug product                                                                                  |
|--------------|----------------------------------------------|----------------------------|-----------------------------------------------------------------------------------------------|
| 16305        | corticosteroids (for respiratory conditions) | fluticasone propionate     | flixitide 2mg/2ml nebules (glaxosmithkline uk ltd)                                            |
| 14757        | corticosteroids (for respiratory conditions) | beclometasone dipropionate | pulvinal beclometasone dipropionate 100micrograms/dose dry powder inhaler (chiesi ltd)        |
| 909          | unknown                                      | budesonide                 | budesonide 200micrograms/dose inhaler                                                         |
| 1959         | corticosteroids (for respiratory conditions) | budesonide                 | pulmicort 0.5mg respules (astrazeneca uk ltd)                                                 |
| 1861         | corticosteroids (for respiratory conditions) | beclometasone dipropionate | aerobec 100 autohaler (meda pharmaceuticals ltd)                                              |
| 16018        | corticosteroids (for respiratory conditions) | mometasone furoate         | mometasone 200micrograms/dose dry powder inhaler                                              |
| 35631        | corticosteroids (for respiratory conditions) | budesonide                 | budelin novolizer 200micrograms/dose inhalation powder (meda pharmaceuticals ltd)             |
| 60937        | corticosteroids (for respiratory conditions) | budesonide                 | pulmicort 200 turbohaler (dowelhurst ltd)                                                     |
| 50037        | corticosteroids (for respiratory conditions) | budesonide                 | pulmicort 0.5mg respules (waymade healthcare plc)                                             |
| 19389        | corticosteroids (for respiratory conditions) | beclometasone dipropionate | asmabec 50microgram/actuation spacehaler (celltech pharma europe ltd)                         |
| 2282         | corticosteroids (for respiratory conditions) | fluticasone propionate     | fluticasone propionate 500micrograms/dose dry powder inhaler                                  |
| 18848        | corticosteroids (for respiratory conditions) | beclometasone dipropionate | qvar 100micrograms/dose easi-breathe inhaler (teva uk ltd)                                    |
| 2440         | corticosteroids (for respiratory conditions) | fluticasone propionate     | flixitide accuhaler 500 500microgram/inhalation inhalation powder (allen & hanburys ltd)      |
| 23741        | corticosteroids (for respiratory conditions) | budesonide                 | novolizer budesonide 200microgram/actuation pressurised inhalation (meda pharmaceuticals ltd) |
| 3988         | unknown                                      |                            | flixitide diskhaler-community pack 100 mcg                                                    |
| 35724        | corticosteroids (for respiratory conditions) | budesonide                 | budelin novolizer 200micrograms/dose inhalation powder refill (meda pharmaceuticals ltd)      |
| 1380         | corticosteroids (in chronic bowel disorders) | budesonide                 | entocort cr 3mg capsules (astrazeneca uk ltd)                                                 |
| 56144        | corticosteroids (in chronic bowel disorders) | budesonide                 | budenofalk 9mg gastro-resistant granules sachets (dr. falk pharma uk ltd)                     |
| 56475        | corticosteroids (for respiratory conditions) | fluticasone propionate     | flixitide 50micrograms/dose accuhaler (sigma pharmaceuticals plc)                             |
| 40057        | corticosteroids (for respiratory conditions) | budesonide                 | pulmicort 200micrograms/dose inhaler cfc free (astrazeneca uk ltd)                            |
| 1236         | corticosteroids (for respiratory conditions) | beclometasone dipropionate | becloforte 250micrograms/dose inhaler (glaxosmithkline uk ltd)                                |

| Product code | BNF header                                   | Drug substance             | Drug product                                                              |
|--------------|----------------------------------------------|----------------------------|---------------------------------------------------------------------------|
| 11497        | corticosteroids (for respiratory conditions) | beclometasone dipropionate | beclometasone 400micrograms/dose dry powder inhaler                       |
| 35408        | corticosteroids (for respiratory conditions) | beclometasone dipropionate | becodisks 100microgram (glaxosmithkline uk ltd)                           |
| 34315        | corticosteroids (for respiratory conditions) | beclometasone dipropionate | beclometasone 250microgram/actuation inhalation powder (actavis uk ltd)   |
| 956          | corticosteroids (for respiratory conditions) | budesonide                 | pulmicort 200 turbohaler (astrazeneca uk ltd)                             |
| 18394        | corticosteroids (for respiratory conditions) | beclometasone dipropionate | bdp 50microgram/actuation spacehaler (celltech pharma europe ltd)         |
| 14321        | corticosteroids (for respiratory conditions) | beclometasone dipropionate | beclometasone 200micrograms/dose inhaler cfc free                         |
| 11732        | corticosteroids (for respiratory conditions) | beclometasone dipropionate | beclometasone 50micrograms/dose breath actuated inhaler cfc free          |
| 3993         | corticosteroids (for respiratory conditions) | beclometasone dipropionate | filair forte 250micrograms/dose inhaler (meda pharmaceuticals ltd)        |
| 35225        | corticosteroids (for respiratory conditions) | fluticasone propionate     | flixtotide 100microgram disks with diskhaler (glaxosmithkline uk ltd)     |
| 5521         | corticosteroids (for respiratory conditions) | beclometasone dipropionate | beclometasone 200micrograms/dose dry powder inhaler                       |
| 4601         | corticosteroids (for respiratory conditions) | beclometasone dipropionate | asmabec 100 clickhaler (focus pharmaceuticals ltd)                        |
| 16148        | corticosteroids (for respiratory conditions) | beclometasone dipropionate | clenil modulite 250micrograms/dose inhaler (chiesi ltd)                   |
| 2892         | corticosteroids (for respiratory conditions) | beclometasone dipropionate | becloforte 400microgram disks (glaxosmithkline uk ltd)                    |
| 35071        | corticosteroids (for respiratory conditions) | beclometasone dipropionate | becodisks 200microgram (glaxosmithkline uk ltd)                           |
| 35510        | corticosteroids (for respiratory conditions) | budesonide                 | budesonide 200micrograms/dose dry powder inhalation cartridge with device |
| 14567        | corticosteroids (for respiratory conditions) | beclometasone dipropionate | asmabec 250 clickhaler (focus pharmaceuticals ltd)                        |
| 56498        | corticosteroids (for respiratory conditions) | budesonide                 | pulmicort 200 turbohaler (waymade healthcare plc)                         |
| 24660        | unknown                                      |                            | betamethasone valerate                                                    |
| 51997        | corticosteroids (in chronic bowel disorders) | budesonide                 | budesonide 9mg gastro-resistant granules sachets                          |
| 1734         | corticosteroids (for respiratory conditions) | beclometasone dipropionate | beclometasone 100micrograms/dose breath actuated inhaler                  |
| 36090        | corticosteroids (for respiratory conditions) | fluticasone propionate     | flixtotide 100microgram disks (glaxosmithkline uk ltd)                    |
| 5975         | corticosteroids (for respiratory conditions) | fluticasone propionate     | fluticasone 125micrograms/dose inhaler cfc free                           |
| 19401        | corticosteroids (for respiratory conditions) | beclometasone dipropionate | beclometasone 250micrograms/actuation inhaler and compact spacer          |

| Product code | BNF header                                   | Drug substance             | Drug product                                                                                    |
|--------------|----------------------------------------------|----------------------------|-------------------------------------------------------------------------------------------------|
| 895          | corticosteroids (for respiratory conditions) | beclometasone dipropionate | beclazone 100 easi-breathe inhaler (teva uk ltd)                                                |
| 51815        | corticosteroids (for respiratory conditions) | fluticasone propionate     | flixtotide 250micrograms/dose evohaler (waymade healthcare plc)                                 |
| 36021        | corticosteroids (for respiratory conditions) | fluticasone propionate     | fluticasone propionate 50microgram inhalation powder blisters with device                       |
| 11198        | corticosteroids (for respiratory conditions) | beclometasone dipropionate | beclometasone 50 micrograms/actuation vortex inhaler                                            |
| 50287        | corticosteroids (for respiratory conditions) | beclometasone dipropionate | qvar 100 inhaler (de pharmaceuticals)                                                           |
| 34428        | corticosteroids (for respiratory conditions) | beclometasone dipropionate | beclometasone 50microgram/actuation inhalation powder (neo laboratories ltd)                    |
| 26063        | corticosteroids (for respiratory conditions) | beclometasone dipropionate | beclometasone 100micrograms/dose inhaler (teva uk ltd)                                          |
| 35602        | corticosteroids (for respiratory conditions) | budesonide                 | budesonide 200micrograms/dose dry powder inhalation cartridge                                   |
| 30238        | corticosteroids (for respiratory conditions) | beclometasone dipropionate | beclometasone 50microgram/actuation pressurised inhalation (approved prescription services ltd) |
| 14700        | corticosteroids (for respiratory conditions) | budesonide                 | budesonide 400micrograms/actuation inhaler                                                      |
| 38           | corticosteroids (for respiratory conditions) | beclometasone dipropionate | beclometasone 100micrograms/dose inhaler                                                        |
| 13815        | corticosteroids (for respiratory conditions) | beclometasone dipropionate | beclazone 100microgram/actuation inhalation powder (actavis uk ltd)                             |
| 947          | corticosteroids (for respiratory conditions) | budesonide                 | budesonide 50micrograms/actuation refill canister                                               |
| 10321        | unknown                                      | budesonide                 | budesonide 400microgram inhalation powder capsules                                              |
| 1426         | corticosteroids (for respiratory conditions) | fluticasone propionate     | flixtotide 500microgram disc (allen & hanburys ltd)                                             |
| 3150         | corticosteroids (for respiratory conditions) | beclometasone dipropionate | beclometasone 100micrograms/actuation extrafine particle cfc free inhaler                       |
| 35113        | corticosteroids (for respiratory conditions) | beclometasone dipropionate | beclometasone 200microgram inhalation powder blisters                                           |
| 1424         | corticosteroids (for respiratory conditions) | fluticasone propionate     | flixtotide 250microgram disc (allen & hanburys ltd)                                             |
| 4803         | corticosteroids (for respiratory conditions) | beclometasone dipropionate | beclazone 250microgram/actuation inhalation powder (actavis uk ltd)                             |
| 56493        | corticosteroids (for respiratory conditions) | beclometasone dipropionate | qvar 50micrograms/dose easi-breathe inhaler (sigma pharmaceuticals plc)                         |
| 61664        | corticosteroids (for respiratory conditions) | beclometasone dipropionate | clenil modulite 250micrograms/dose inhaler (waymade healthcare plc)                             |

| Product code | BNF header                                   | Drug substance             | Drug product                                                                                   |
|--------------|----------------------------------------------|----------------------------|------------------------------------------------------------------------------------------------|
| 35772        | corticosteroids (for respiratory conditions) | fluticasone propionate     | fluticasone propionate 100microgram inhalation powder blisters                                 |
| 3119         | corticosteroids (for respiratory conditions) | beclometasone dipropionate | becloforte integra 250microgram/actuation inhaler with compact spacer (glaxo laboratories ltd) |
| 5522         | corticosteroids (for respiratory conditions) | beclometasone dipropionate | beclometasone 100micrograms/dose dry powder inhaler                                            |
| 25204        | corticosteroids (for respiratory conditions) | beclometasone dipropionate | beclometasone 100micrograms/dose inhaler (a a h pharmaceuticals ltd)                           |
| 7724         | corticosteroids (for respiratory conditions) | betamethasone valerate     | betamethasone valerate 100micrograms/actuation inhaler                                         |
| 3743         | corticosteroids (for respiratory conditions) | beclometasone dipropionate | filair 50 inhaler (meda pharmaceuticals ltd)                                                   |
| 1956         | corticosteroids (for respiratory conditions) | budesonide                 | pulmicort 1mg respules (astrazeneca uk ltd)                                                    |
| 56499        | corticosteroids (for respiratory conditions) | fluticasone propionate     | flixtide 500micrograms/dose accuhaler (waymade healthcare plc)                                 |
| 2125         | corticosteroids (for respiratory conditions) | budesonide                 | pulmicort 200microgram refill canister (astrazeneca uk ltd)                                    |
| 36401        | corticosteroids (for respiratory conditions) | fluticasone propionate     | fluticasone propionate 250microgram inhalation powder blisters with device                     |
| 4688         | corticosteroids (for respiratory conditions) | fluticasone propionate     | fluticasone 50microgram/actuation pressurised inhalation                                       |
| 3065         | corticosteroids (for respiratory conditions) | betamethasone valerate     | bexasol inhalation powder (allen & hanburys ltd)                                               |
| 35118        | corticosteroids (for respiratory conditions) | beclometasone dipropionate | becodisks 400microgram with diskhaler (glaxosmithkline uk ltd)                                 |
| 1518         | corticosteroids (for respiratory conditions) | fluticasone propionate     | flixtide 50microgram/actuation inhalation powder (allen & hanburys ltd)                        |
| 5309         | corticosteroids (for respiratory conditions) | fluticasone propionate     | flixtide 50micrograms/dose evohaler (glaxosmithkline uk ltd)                                   |
| 47225        | unknown                                      | budesonide                 | budesonide 9mg gastro-resistant granules sachets                                               |
| 30649        | corticosteroids (for respiratory conditions) | budesonide                 | easyhaler budesonide 400micrograms/dose dry powder inhaler (orion pharma (uk) ltd)             |
| 35580        | corticosteroids (for respiratory conditions) | beclometasone dipropionate | beclometasone 100microgram inhalation powder blisters with device                              |
| 41412        | corticosteroids (for respiratory conditions) | beclometasone dipropionate | beclometasone 400micrograms/actuation inhaler                                                  |
| 20825        | corticosteroids (for respiratory conditions) | beclometasone dipropionate | spacehaler bdp 250microgram/actuation spacehaler (celltech pharma europe ltd)                  |

| Product code | BNF header                                   | Drug substance             | Drug product                                                                                     |
|--------------|----------------------------------------------|----------------------------|--------------------------------------------------------------------------------------------------|
| 35461        | corticosteroids (for respiratory conditions) | fluticasone propionate     | flixtotide 250microgram disks with diskhaler (glaxosmithkline uk ltd)                            |
| 42985        | corticosteroids (for respiratory conditions) | fluticasone propionate     | flixtotide 50micrograms/dose accuhaler (glaxosmithkline uk ltd)                                  |
| 9921         | corticosteroids (for respiratory conditions) | beclometasone dipropionate | beclometasone 100micrograms/dose breath actuated inhaler cfc free                                |
| 56474        | corticosteroids (for respiratory conditions) | fluticasone propionate     | flixtotide 125micrograms/dose evohaler (de pharmaceuticals)                                      |
| 35986        | corticosteroids (for respiratory conditions) | fluticasone propionate     | flixtotide 50microgram disks (glaxosmithkline uk ltd)                                            |
| 11149        | glucocorticoid therapy                       | betamethasone              | betnelan 500microgram tablets (focus pharmaceuticals ltd)                                        |
| 1243         | corticosteroids (for respiratory conditions) | beclometasone dipropionate | beclazone 250 easi-breathe inhaler (teva uk ltd)                                                 |
| 31774        | corticosteroids (for respiratory conditions) | beclometasone dipropionate | beclometasone 50micrograms/dose inhaler (generics (uk) ltd)                                      |
| 56477        | corticosteroids (for respiratory conditions) | fluticasone propionate     | flixtotide 100micrograms/dose accuhaler (waymade healthcare plc)                                 |
| 2600         | corticosteroids (for respiratory conditions) | beclometasone dipropionate | beclometasone 250micrograms/dose breath actuated inhaler                                         |
| 16151        | corticosteroids (for respiratory conditions) | beclometasone dipropionate | clenil modulite 200micrograms/dose inhaler (chiesi ltd)                                          |
| 1100         | corticosteroids (for respiratory conditions) | beclometasone dipropionate | beclazone 100 inhaler (teva uk ltd)                                                              |
| 1951         | corticosteroids (for respiratory conditions) | beclometasone dipropionate | becodisks 400microgram disc (allen & hanburys ltd)                                               |
| 7948         | corticosteroids (for respiratory conditions) | fluticasone propionate     | fluticasone propionate 250micrograms/dose dry powder inhaler                                     |
| 21482        | corticosteroids (for respiratory conditions) | beclometasone dipropionate | beclometasone 100micrograms/dose inhaler (generics (uk) ltd)                                     |
| 9477         | corticosteroids (for respiratory conditions) | beclometasone dipropionate | asmabec 100microgram/actuation spacehaler (celltech pharma europe ltd)                           |
| 27679        | corticosteroids (for respiratory conditions) | beclometasone dipropionate | beclometasone 100microgram/actuation pressurised inhalation (approved prescription services ltd) |
| 35652        | corticosteroids (for respiratory conditions) | beclometasone dipropionate | beclometasone 100microgram inhalation powder blisters                                            |
| 46157        | corticosteroids (for respiratory conditions) | beclometasone dipropionate | beclometasone 200 cyclocaps (teva uk ltd)                                                        |
| 56484        | corticosteroids (for respiratory conditions) | fluticasone propionate     | flixtotide 250micrograms/dose accuhaler (waymade healthcare plc)                                 |
| 3442         | unknown                                      |                            | pulmicort complete 200 mcg inh                                                                   |

| Product code | BNF header                                   | Drug substance             | Drug product                                                                 |
|--------------|----------------------------------------------|----------------------------|------------------------------------------------------------------------------|
| 28761        | corticosteroids (for respiratory conditions) | beclometasone dipropionate | spacehaler bdp 50microgram/actuation spacehaler (celltech pharma europe ltd) |
| 5992         | corticosteroids (for respiratory conditions) | beclometasone dipropionate | beclometasone 50micrograms/dose dry powder inhaler                           |
| 454          | corticosteroids (for respiratory conditions) | budesonide                 | pulmicort 200microgram inhaler (astrazeneca uk ltd)                          |
| 3220         | corticosteroids (for respiratory conditions) | beclometasone dipropionate | qvar 50 autohaler (teva uk ltd)                                              |
| 18537        | unknown                                      | budesonide                 | budesonide 200microgram inhalation powder capsules                           |
| 57555        | corticosteroids (for respiratory conditions) | fluticasone propionate     | flixotide 125micrograms/dose evohaler (dowelhurst ltd)                       |
| 48709        | corticosteroids (for respiratory conditions) | beclometasone dipropionate | qvar 100micrograms/dose easi-breathe inhaler (sigma pharmaceuticals plc)     |
| 16584        | corticosteroids (for respiratory conditions) | beclometasone dipropionate | beclometasone 50micrograms/dose inhaler cfc free                             |
| 35392        | corticosteroids (for respiratory conditions) | fluticasone propionate     | flixotide 500microgram disks with diskhaler (glaxosmithkline uk ltd)         |

## FP\_SAL codes

| Product code | BNF header                                                             | Drug substance                              | Drug product                                                                                |
|--------------|------------------------------------------------------------------------|---------------------------------------------|---------------------------------------------------------------------------------------------|
| 638          | Selective Beta 2 Agonists/Corticosteroids (for Respiratory Conditions) | Fluticasone propionate/Salmeterol xinafoate | Seretide 250 Accuhaler (GlaxoSmithKline UK Ltd)                                             |
| 665          | Selective Beta 2 Agonists/Corticosteroids (for Respiratory Conditions) | Salmeterol xinafoate/Fluticasone propionate | Seretide 100 Accuhaler (GlaxoSmithKline UK Ltd)                                             |
| 3666         | Selective Beta 2 Agonists/Corticosteroids (for Respiratory Conditions) | Salmeterol xinafoate/Fluticasone propionate | Seretide 500 Accuhaler (GlaxoSmithKline UK Ltd)                                             |
| 5143         | Selective Beta 2 Agonists/Corticosteroids (for Respiratory Conditions) | Fluticasone propionate/Salmeterol xinafoate | Seretide 50 Evohaler (GlaxoSmithKline UK Ltd)                                               |
| 5161         | Selective Beta 2 Agonists/Corticosteroids (for Respiratory Conditions) | Fluticasone propionate/Salmeterol xinafoate | Seretide 125 Evohaler (GlaxoSmithKline UK Ltd)                                              |
| 5172         | Selective Beta 2 Agonists/Corticosteroids (for Respiratory Conditions) | Fluticasone propionate/Salmeterol xinafoate | Seretide 250 Evohaler (GlaxoSmithKline UK Ltd)                                              |
| 5558         | Selective Beta 2 Agonists/Corticosteroids (for Respiratory Conditions) | Salmeterol Xinafoate/Fluticasone Propionate | Salmeterol 50micrograms with fluticasone 500micrograms CFC free inhaler                     |
| 5864         | Selective Beta 2 Agonists/Corticosteroids (for Respiratory Conditions) | Salmeterol Xinafoate/Fluticasone Propionate | Salmeterol 25micrograms with fluticasone 250micrograms CFC free inhaler                     |
| 5942         | Selective Beta 2 Agonists/Corticosteroids (for Respiratory Conditions) | Salmeterol Xinafoate/Fluticasone Propionate | Salmeterol 50micrograms with fluticasone 250micrograms CFC free inhaler                     |
| 6569         | Selective Beta 2 Agonists/Corticosteroids (for Respiratory Conditions) | Salmeterol Xinafoate/Fluticasone Propionate | Salmeterol 25micrograms with fluticasone 125micrograms CFC free inhaler                     |
| 6616         | Selective Beta 2 Agonists/Corticosteroids (for Respiratory Conditions) | Salmeterol Xinafoate/Fluticasone Propionate | Salmeterol 25micrograms with fluticasone 50micrograms CFC free inhaler                      |
| 6938         | Selective Beta 2 Agonists/Corticosteroids (for Respiratory Conditions) | Salmeterol Xinafoate/Fluticasone Propionate | Salmeterol 50micrograms with fluticasone 100micrograms dry powder inhaler                   |
| 11410        | Selective Beta 2 Agonists/Corticosteroids (for Respiratory Conditions) | Salmeterol xinafoate/Fluticasone propionate | Fluticasone propionate 500micrograms/dose / Salmeterol 50micrograms/dose dry powder inhaler |
| 11588        | Selective Beta 2 Agonists/Corticosteroids (for Respiratory Conditions) | Fluticasone propionate/Salmeterol xinafoate | Fluticasone 125micrograms/dose / Salmeterol 25micrograms/dose inhaler CFC free              |
| 11618        | Selective Beta 2 Agonists/Corticosteroids (for Respiratory Conditions) | Fluticasone propionate/Salmeterol xinafoate | Fluticasone 250micrograms/dose / Salmeterol 25micrograms/dose inhaler CFC free              |
| 12994        | Selective Beta 2 Agonists/Corticosteroids (for Respiratory Conditions) | Fluticasone propionate/Salmeterol xinafoate | Fluticasone 50micrograms/dose / Salmeterol 25micrograms/dose inhaler CFC free               |

| Product code | BNF header                                                             | Drug substance                                       | Drug product                                                                                |
|--------------|------------------------------------------------------------------------|------------------------------------------------------|---------------------------------------------------------------------------------------------|
| 13040        | Selective Beta 2 Agonists/Corticosteroids (for Respiratory Conditions) | Fluticasone propionate/Salmeterol xinafoate          | Fluticasone propionate 250micrograms/dose / Salmeterol 50micrograms/dose dry powder inhaler |
| 13273        | Selective Beta 2 Agonists/Corticosteroids (for Respiratory Conditions) | Salmeterol xinafoate/Fluticasone propionate          | Fluticasone propionate 100micrograms/dose / Salmeterol 50micrograms/dose dry powder inhaler |
| 48739        | Selective Beta 2 Agonists/Corticosteroids (for Respiratory Conditions) | Fluticasone propionate/Salmeterol xinafoate          | Seretide 250 Evohaler (DE Pharmaceuticals)                                                  |
| 49000        | Selective Beta 2 Agonists/Corticosteroids (for Respiratory Conditions) | Fluticasone propionate/Salmeterol xinafoate          | Seretide 250 Evohaler (Waymade Healthcare Plc)                                              |
| 50560        | Selective Beta 2 Agonists/Corticosteroids (for Respiratory Conditions) | Fluticasone propionate/Salmeterol xinafoate          | Seretide 250 Accuhaler (Sigma Pharmaceuticals Plc)                                          |
| 50689        | Selective Beta 2 Agonists/Corticosteroids (for Respiratory Conditions) | Fluticasone propionate/Formoterol fumarate dihydrate | Flutiform 50micrograms/dose / 5micrograms/dose inhaler (Napp Pharmaceuticals Ltd)           |
| 50886        | Selective Beta 2 Agonists/Corticosteroids (for Respiratory Conditions) | Fluticasone propionate/Salmeterol xinafoate          | Seretide 250 Evohaler (Stephar (U.K.) Ltd)                                                  |
| 51027        | Selective Beta 2 Agonists/Corticosteroids (for Respiratory Conditions) | Fluticasone propionate/Salmeterol xinafoate          | Seretide 125 Evohaler (DE Pharmaceuticals)                                                  |
| 51151        | Selective Beta 2 Agonists/Corticosteroids (for Respiratory Conditions) | Fluticasone propionate/Salmeterol xinafoate          | Seretide 125 Evohaler (Lexon (UK) Ltd)                                                      |
| 51270        | Selective Beta 2 Agonists/Corticosteroids (for Respiratory Conditions) | Fluticasone propionate/Formoterol fumarate dihydrate | Fluticasone 50micrograms/dose / Formoterol 5micrograms/dose inhaler CFC free                |
| 51394        | Selective Beta 2 Agonists/Corticosteroids (for Respiratory Conditions) | Salmeterol xinafoate/Fluticasone propionate          | Seretide 500 Accuhaler (Waymade Healthcare Plc)                                             |
| 51593        | Selective Beta 2 Agonists/Corticosteroids (for Respiratory Conditions) | Salmeterol xinafoate/Fluticasone propionate          | Seretide 500 Accuhaler (DE Pharmaceuticals)                                                 |
| 51861        | Selective Beta 2 Agonists/Corticosteroids (for Respiratory Conditions) | Salmeterol xinafoate/Fluticasone propionate          | Seretide 500 Accuhaler (Mawdsley-Brooks & Company Ltd)                                      |
| 51909        | Selective Beta 2 Agonists/Corticosteroids (for Respiratory Conditions) | Fluticasone propionate/Salmeterol xinafoate          | Seretide 250 Evohaler (Necessity Supplies Ltd)                                              |
| 53230        | Selective Beta 2 Agonists/Corticosteroids (for Respiratory Conditions) | Fluticasone propionate/Salmeterol xinafoate          | Seretide 250 Accuhaler (DE Pharmaceuticals)                                                 |
| 53283        | Selective Beta 2 Agonists/Corticosteroids (for Respiratory Conditions) | Salmeterol xinafoate/Fluticasone propionate          | Seretide 100 Accuhaler (Waymade Healthcare Plc)                                             |
| 55411        | Corticosteroids Used In Nasal Allergy/Antihistamines In Nasal Allergy  | Fluticasone propionate/Azelastine hydrochloride      | Fluticasone propionate 50micrograms/dose / Azelastine 137micrograms/dose nasal spray        |
| 55435        | Corticosteroids Used In Nasal Allergy/Antihistamines In Nasal Allergy  | Fluticasone propionate/Azelastine hydrochloride      | Dymista 137micrograms/dose / 50micrograms/dose nasal spray (Meda Pharmaceuticals Ltd)       |



| Product code | BNF header                                                             | Drug substance                              | Drug product                                                        |
|--------------|------------------------------------------------------------------------|---------------------------------------------|---------------------------------------------------------------------|
| 55677        | Selective Beta 2 Agonists/Corticosteroids (for Respiratory Conditions) | Salmeterol xinafoate/Fluticasone propionate | Seretide 500 Accuhaler (Lexon (UK) Ltd)                             |
| 61280        | Selective Beta 2 Agonists/Corticosteroids (for Respiratory Conditions) | Fluticasone propionate/Salmeterol xinafoate | Seretide 250 Accuhaler (Waymade Healthcare Plc)                     |
| 62126        | Selective Beta 2 Agonists/Corticosteroids (for Respiratory Conditions) | Salmeterol xinafoate/Fluticasone propionate | Seretide 100 Accuhaler (DE Pharmaceuticals)                         |
| 63252        | Selective Beta 2 Agonists/Corticosteroids (for Respiratory Conditions) | Fluticasone propionate/Salmeterol xinafoate | Seretide 250 Evohaler (Lexon (UK) Ltd)                              |
| 63945        | Selective Beta 2 Agonists/Corticosteroids (for Respiratory Conditions) | Fluticasone propionate/Salmeterol xinafoate | Seretide 250 Accuhaler (Lexon (UK) Ltd)                             |
| 64372        | Selective Beta 2 Agonists/Corticosteroids (for Respiratory Conditions) | Fluticasone propionate/Salmeterol xinafoate | Sirdupla 25micrograms/dose / 125micrograms/dose inhaler (Mylan Ltd) |
| 64373        | Selective Beta 2 Agonists/Corticosteroids (for Respiratory Conditions) | Fluticasone propionate/Salmeterol xinafoate | Sirdupla 25micrograms/dose / 250micrograms/dose inhaler (Mylan Ltd) |
| 65117        | Selective Beta 2 Agonists/Corticosteroids (for Respiratory Conditions) | Fluticasone propionate/Salmeterol xinafoate | Seretide 125 Evohaler (Mawdsley-Brooks & Company Ltd)               |

**STROBE 2007 (v4) Statement—Checklist of items that should be included in reports of *cohort studies***

| Section/Topic                | Item # | Recommendation                                                                                                                                                                       | Reported on page #                                                                                                             |
|------------------------------|--------|--------------------------------------------------------------------------------------------------------------------------------------------------------------------------------------|--------------------------------------------------------------------------------------------------------------------------------|
| Title and abstract           | 1      | (a) Indicate the study's design with a commonly used term in the title or the abstract                                                                                               | 1                                                                                                                              |
|                              |        | (b) Provide in the abstract an informative and balanced summary of what was done and what was found                                                                                  | 3 (note: is a protocol for an observational study so here and subsequently is reported <i>what is planned to be done</i> only) |
| <b>Introduction</b>          |        |                                                                                                                                                                                      |                                                                                                                                |
| Background/rationale         | 2      | Explain the scientific background and rationale for the investigation being reported                                                                                                 | 5                                                                                                                              |
| Objectives                   | 3      | State specific objectives, including any prespecified hypotheses                                                                                                                     | 6                                                                                                                              |
| <b>Methods</b>               |        |                                                                                                                                                                                      |                                                                                                                                |
| Study design                 | 4      | Present key elements of study design early in the paper                                                                                                                              | 6                                                                                                                              |
| Setting                      | 5      | Describe the setting, locations, and relevant dates, including periods of recruitment, exposure, follow-up, and data collection                                                      | 6                                                                                                                              |
| Participants                 | 6      | (a) Give the eligibility criteria, and the sources and methods of selection of participants. Describe methods of follow-up                                                           | 7 - 10                                                                                                                         |
|                              |        | (b) For matched studies, give matching criteria and number of exposed and unexposed                                                                                                  | 7 - 10                                                                                                                         |
| Variables                    | 7      | Clearly define all outcomes, exposures, predictors, potential confounders, and effect modifiers. Give diagnostic criteria, if applicable                                             | 13 - 14                                                                                                                        |
| Data sources/<br>measurement | 8*     | For each variable of interest, give sources of data and details of methods of assessment (measurement). Describe comparability of assessment methods if there is more than one group | 6                                                                                                                              |
| Bias                         | 9      | Describe any efforts to address potential sources of bias                                                                                                                            | 14 - 16                                                                                                                        |
| Study size                   | 10     | Explain how the study size was arrived at                                                                                                                                            | 14                                                                                                                             |
| Quantitative variables       | 11     | Explain how quantitative variables were handled in the analyses. If applicable, describe which groupings were chosen and why                                                         | 11                                                                                                                             |

|                     |     |                                                                                                                                                                                                              |                                                      |
|---------------------|-----|--------------------------------------------------------------------------------------------------------------------------------------------------------------------------------------------------------------|------------------------------------------------------|
| Statistical methods | 12  | (a) Describe all statistical methods, including those used to control for confounding                                                                                                                        | 14 - 16                                              |
|                     |     | (b) Describe any methods used to examine subgroups and interactions                                                                                                                                          | 14 - 16                                              |
|                     |     | (c) Explain how missing data were addressed                                                                                                                                                                  | 16                                                   |
|                     |     | (d) If applicable, explain how loss to follow-up was addressed                                                                                                                                               | NA                                                   |
|                     |     | (e) Describe any sensitivity analyses                                                                                                                                                                        | 14 - 16                                              |
| <b>Results</b>      |     |                                                                                                                                                                                                              | <i>NA (is a protocol for an observational study)</i> |
| Participants        | 13* | (a) Report numbers of individuals at each stage of study—eg numbers potentially eligible, examined for eligibility, confirmed eligible, included in the study, completing follow-up, and analysed            |                                                      |
|                     |     | (b) Give reasons for non-participation at each stage                                                                                                                                                         |                                                      |
|                     |     | (c) Consider use of a flow diagram                                                                                                                                                                           |                                                      |
| Descriptive data    | 14* | (a) Give characteristics of study participants (eg demographic, clinical, social) and information on exposures and potential confounders                                                                     |                                                      |
|                     |     | (b) Indicate number of participants with missing data for each variable of interest                                                                                                                          |                                                      |
|                     |     | (c) Summarise follow-up time (eg, average and total amount)                                                                                                                                                  |                                                      |
| Outcome data        | 15* | Report numbers of outcome events or summary measures over time                                                                                                                                               |                                                      |
| Main results        | 16  | (a) Give unadjusted estimates and, if applicable, confounder-adjusted estimates and their precision (eg, 95% confidence interval). Make clear which confounders were adjusted for and why they were included |                                                      |
|                     |     | (b) Report category boundaries when continuous variables were categorized                                                                                                                                    |                                                      |
|                     |     | (c) If relevant, consider translating estimates of relative risk into absolute risk for a meaningful time period                                                                                             |                                                      |
| Other analyses      | 17  | Report other analyses done—eg analyses of subgroups and interactions, and sensitivity analyses                                                                                                               |                                                      |
| <b>Discussion</b>   |     |                                                                                                                                                                                                              | <i>NA (is a protocol for an observational study)</i> |
| Key results         | 18  | Summarise key results with reference to study objectives                                                                                                                                                     |                                                      |
| <b>Limitations</b>  |     |                                                                                                                                                                                                              | <i>NA (is a protocol for an observational study)</i> |
| Interpretation      | 20  | Give a cautious overall interpretation of results considering objectives, limitations, multiplicity of analyses, results from similar studies, and other relevant evidence                                   |                                                      |

1  
2  
3  
4  
5  
6  
7  
8  
9  
10  
11  
12  
13  
14  
15  
16  
17  
18  
19  
20  
21  
22  
23  
24  
25  
26  
27  
28  
29  
30  
31  
32  
33  
34  
35  
36  
37  
38  
39  
40  
41  
42  
43  
44  
45  
46  
47

|                          |    |                                                                                                                                                               |   |
|--------------------------|----|---------------------------------------------------------------------------------------------------------------------------------------------------------------|---|
| Generalisability         | 21 | Discuss the generalisability (external validity) of the study results                                                                                         |   |
| <b>Other information</b> |    |                                                                                                                                                               |   |
| Funding                  | 22 | Give the source of funding and the role of the funders for the present study and, if applicable, for the original study on which the present article is based | 2 |

\*Give information separately for cases and controls in case-control studies and, if applicable, for exposed and unexposed groups in cohort and cross-sectional studies.

**Note:** An Explanation and Elaboration article discusses each checklist item and gives methodological background and published examples of transparent reporting. The STROBE checklist is best used in conjunction with this article (freely available on the Web sites of PLoS Medicine at <http://www.plosmedicine.org/>, Annals of Internal Medicine at <http://www.annals.org/>, and Epidemiology at <http://www.epidem.com/>). Information on the STROBE Initiative is available at [www.strobe-statement.org](http://www.strobe-statement.org).

For peer review only

# BMJ Open

## Real world effects of medications for chronic obstructive pulmonary disease: protocol for a UK population-based non-interventional cohort study with validation against randomised trial results

|                                 |                                                                                                                                                                                                                                                                                                                                                                                                                                                                                                                         |
|---------------------------------|-------------------------------------------------------------------------------------------------------------------------------------------------------------------------------------------------------------------------------------------------------------------------------------------------------------------------------------------------------------------------------------------------------------------------------------------------------------------------------------------------------------------------|
| Journal:                        | <i>BMJ Open</i>                                                                                                                                                                                                                                                                                                                                                                                                                                                                                                         |
| Manuscript ID                   | bmjopen-2017-019475.R2                                                                                                                                                                                                                                                                                                                                                                                                                                                                                                  |
| Article Type:                   | Protocol                                                                                                                                                                                                                                                                                                                                                                                                                                                                                                                |
| Date Submitted by the Author:   | 24-Jan-2018                                                                                                                                                                                                                                                                                                                                                                                                                                                                                                             |
| Complete List of Authors:       | Wing, Kevin; London School of Hygiene and Tropical Medicine, Williamson, Elizabeth; London School of Hygiene and Tropical Medicine, Carpenter, James; London School of Hygiene and Tropical Medicine Wise, Lesley; London School of Hygiene and Tropical Medicine Schneeweiss, Sebastian; Brigham and Womens' Hospital, Harvard Medical School<br>Smeeth, Liam; London School of Hygiene and Tropical Medicine Quint, Jennifer; Imperial College London<br>Douglas, Ian; London School of Hygiene and Tropical Medicine |
| <b>Primary Subject Heading</b>: | Epidemiology                                                                                                                                                                                                                                                                                                                                                                                                                                                                                                            |
| Secondary Subject Heading:      | Evidence based practice, Research methods, Respiratory medicine, Public health, Pharmacology and therapeutics                                                                                                                                                                                                                                                                                                                                                                                                           |
| Keywords:                       | Chronic airways disease < THORACIC MEDICINE, Epidemiology < THORACIC MEDICINE, CLINICAL PHARMACOLOGY, EPIDEMIOLOGY, PRIMARY CARE, PUBLIC HEALTH                                                                                                                                                                                                                                                                                                                                                                         |
|                                 |                                                                                                                                                                                                                                                                                                                                                                                                                                                                                                                         |

SCHOLARONE™  
Manuscripts

**TITLE PAGE**

**Title:** Real world effects of medications for chronic obstructive pulmonary disease: protocol for a UK population-based non-interventional cohort study with validation against randomised trial results

**Authors:**Kevin Wing<sup>1\*</sup>Elizabeth Williamson<sup>2</sup>James Carpenter<sup>2</sup>Lesley Wise<sup>1</sup>Sebastian Schneeweiss<sup>3,4</sup>Liam Smeeth<sup>1</sup>Jennifer Quint<sup>5</sup>Ian Douglas<sup>1</sup>

<sup>1</sup>Department of Non-communicable Disease Epidemiology, Faculty of Epidemiology and Population Health, London School of Hygiene and Tropical Medicine, London, UK

<sup>2</sup>Department of Medical Statistics, Faculty of Epidemiology and Population Health, London School of Hygiene and Tropical Medicine, London, UK

<sup>3</sup>Department of Epidemiology, Harvard Medical School.

<sup>4</sup>Division of Pharmacoepidemiology and Pharmacoeconomics, Department of Medicine, Brigham & Women's Hospital

<sup>5</sup>National Heart and Lung Institute, Imperial College London, London, United Kingdom

**\*Submitting and corresponding author:** Kevin Wing ([kevin.wing@lshtm.ac.uk](mailto:kevin.wing@lshtm.ac.uk)), London School of Hygiene and Tropical Medicine, Keppel Street, London WC1E 7HT. Tel: +44 20 7636 8636, Fax: +44 20 7436 5389

## Funding statement

This work was supported by NIHR grant number 15/80/28

## Competing interests statement

Dr Wing and Dr Williamson declare no competing interests.

Professor Carpenter is funded 60% by a grant from the MRC, via a secondment to the MRC Clinical Trials Unit. The remaining funding is a combination of HEFCE and small contributions from various NIHR, ESRC, MRC and EU funds. He undertakes methodological consultancy work for Novartis and GlaxoSmithKline, and has given missing data courses for GlaxoSmithKline, Bayer and Boehringer.

Professor Smeeth reports grants from Wellcome, MRC, NIHR, BHF, Diabetes UK, ESRC and the EU; grants and personal fees for advisory work from GSK, and personal fees for advisory work from AstraZeneca. He is a Trustee of the British Heart Foundation.

Dr Wise is an independent consultant to the pharmaceutical industry and is employed to provide advice by a number of different companies none of which is involved in this therapeutic area.

Professor Schneeweiss is a consultant to WHISCON, LLC and to Aetion, Inc., a software manufacturer of which he also owns equity. He is principal investigator of investigator-initiated grants to the Brigham and Women's Hospital from Bayer, Genentech and Boehringer Ingelheim unrelated to the topic of this study. He does not receive personal fees from biopharmaceutical companies.

Professor Smeeth reports grants from Wellcome, MRC, NIHR, BHF, Diabetes UK, ESRC and the EU; grants and personal fees for advisory work from GSK, and personal fees for advisory work from AstraZeneca. He is a Trustee of the British Heart Foundation.

Dr Quint's research group has received funding from MRC, Wellcome, BLF, GSK, BI, AZ and Insmad for other projects, none of which relate to this work.

Dr Douglas is funded by an unrestricted grant from, has consulted for and holds stock in GlaxoSmithKline.

**Word count (not including abstract, tables, figures, or footnotes): 4386**

**Statement about prior postings and presentations:** This work has not been published elsewhere.

## Abstract

### Introduction

Chronic obstructive pulmonary disease (COPD) is a progressive disease affecting 3 million people in the UK, in which patients exhibit airflow obstruction that is not fully reversible. COPD treatment guidelines are largely informed by randomised controlled trial (RCT) results, but it is unclear if these findings apply to large patient populations not studied in trials. Non-interventional studies could be used to study patient groups excluded from trials, but the use of these studies to estimate treatment effectiveness is in its infancy. In this study we will use individual trial data to validate non-interventional methods for assessing COPD treatment effectiveness, before applying these methods to the analysis of treatment effectiveness within people excluded from, or under-represented in COPD trials.

### Methods and analysis

Using individual patient data from the landmark COPD TORCH trial and validated methods for detecting COPD and exacerbations in routinely collected primary care data, we will assemble a cohort in the UK Clinical Practice Research Datalink (selecting people from between the dates of 1<sup>st</sup> January 2004 and 1<sup>st</sup> January 2017) with similar characteristics to TORCH participants and test whether non-interventional data can generate comparable results to trials, using cohort methodology with propensity score techniques to adjust for potential confounding. We will then use the methodological template we have developed to determine risks and benefits of COPD treatments in people excluded from TORCH. Outcomes are pneumonia, COPD exacerbation, mortality and time to treatment change. Groups to be studied include the elderly (>80 years), people with substantial comorbidity, people with and without underlying cardiovascular disease and people with mild COPD.

### Ethics and dissemination

Ethical approval has been granted by the LSHTM Medicines Ethics Committee (Ref: 11997). The study is under review by the Independent Scientific Advisory Committee (ISAC) of the UK Medicines and Healthcare Products Regulatory Agency (MHRA). An application to use the TORCH trial data made to [clinicalstudydatarequest.com](http://clinicalstudydatarequest.com) has been approved. In addition to scientific publications, dissemination methods will be developed based on discussions with COPD patient groups.



## Strengths and limitations of this study

### Strengths

- Large cohort study
- Use of validated methods for detecting COPD within the Clinical Practice Research Datatlink
- Use of randomised controlled trial (RCT) individual patient data to assess ability of non-interventional methods to detect COPD treatment effects within an RCT-analogous population

### Limitations

- Adherence to medication will need to be assessed based on proxy variables (e.g. time covered by prescription)

# Introduction

## Background and rationale

Chronic obstructive pulmonary disease (COPD) affects 3 million people in the UK.<sup>1</sup> The most common cause is smoking, and patients exhibit airflow obstruction that is not fully reversible. The disease is progressive, with declining lung function and a worsening of symptoms. Most troublesome are acute exacerbations manifested as a sudden worsening of symptoms e.g. severe coughing, shortness of breath and chest congestion, requiring urgent treatment, and possibly hospitalisation. Whilst smoking cessation remains the most effective intervention, the rate of exacerbation can be reduced by regular medication such as combination long-acting beta-agonists (LABA) and inhaled corticosteroids (ICS) or long-acting muscarinic antagonists (LAMAs).<sup>2,3</sup>

COPD treatment guidelines are largely informed by randomised controlled trial (RCT) results,<sup>4</sup> but it is not clear if these findings apply to large patient populations not studied in trials. Fluticasone propionate + salmeterol (FP/SAL) is a LABA/ICS combination and is one of the most widely used COPD treatments. It was studied in large randomised trials (e.g. the TORCH trial),<sup>2</sup> but the effects of treatment in important patient groups who were not studied are unknown. Some were excluded from trials (e.g. those >80 years and those with substantial comorbidity) while others are under represented (e.g. people with mild COPD),<sup>2,5</sup> meaning conclusions about these groups are difficult to make.

Whilst the conduct of non-interventional studies (sometimes also referred to as “observational studies”) to investigate possible drug harms is well established, the use of these studies to estimate treatment effectiveness is in its infancy. Issues of treatment channelling and indication bias mean that measuring the intended benefit of a treatment is beset with difficulties. Over the next few years we will see more non-interventional studies of drug effectiveness emerging due to recent legislation requiring pharmaceutical companies to study the real world effects of medications;<sup>6,7</sup> however, rigorous, validated methodology is needed to translate these complex data into reliable evidence. For example, the availability of anonymised individual patient data from randomised controlled trials provides the potential for “RCT-analogue” cohorts to be selected from non-interventional data sources (by matching patient records from non-interventional data to the RCT patient records on key characteristics). If subsequent analysis of a non-interventional RCT-analogue cohort generates results that are similar to those generated by the reference RCT, one could be confident in the validity of the results, and in the non-interventional methods used to obtain these results in this setting.

In this study we will use TORCH<sup>2</sup> individual trial data to validate non-interventional methods for assessing COPD treatment effectiveness, before going on to apply these methods to the analysis of

1 treatment effectiveness within people excluded from or underrepresented in the TORCH trial. Non-  
2 interventional data will be obtained from the UK Clinical Practice Research Datalink (linked to the  
3 Hospital Episodes Statistics database).<sup>8</sup> The results we generate will aid patients, prescribers and  
4 policy makers in deciding the most appropriate treatment for COPD for all types of patients. The  
5 approach used can also provide a template for treatment effectiveness research using non-  
6 interventional data with inbuilt validation against a randomised trial.  
7  
8  
9

## 10 11 12 **Aims and objectives** 13

14 The aims of our study are (1) to measure the association between treatments for COPD and a  
15 number of COPD outcomes including exacerbation rate, mortality, pneumonia, and time to  
16 treatment change amongst patients not included in randomised clinical trials for COPD treatments  
17 and (2) to develop a methodological framework with in built validation against RCT data, for using  
18 non-interventional electronic health records (EHR) to answer questions about drug treatment effects  
19 (i.e. both benefits and risks).  
20

21 Specific objectives are to: (1) validate methods for measuring COPD medication effectiveness in EHR  
22 data by comparing with trial results; (2) use EHR data to measure COPD medication effectiveness in  
23 patients excluded from trials (most importantly those >80 years or with substantial comorbidity) and  
24 (3) determine COPD treatment effectiveness in an under-studied disease stage (mild COPD).  
25  
26  
27  
28  
29  
30

## 31 32 33 34 35 **Methods and analysis** 36

37 Figure 1 provides a high-level overview of the study, detailing each objective and data source used,  
38 and showing how existing RCT data will be used in Objective 1 in order to validate methods for  
39 analysing COPD in routinely collected electronic health data that will then be applied to unanswered  
40 questions in Objective 2 and 3.  
41  
42  
43  
44

## 45 46 **Study design** 47

48 We have chosen a cohort study design as it will allow us to measure the effects of prescribing  
49 different treatments for COPD on future outcomes in different types of patients. Eligibility criteria  
50 for cohort entry will vary between objectives (detailed in the selection of participants section  
51 below).  
52  
53  
54

## 55 56 **Setting/data sources** 57 58 59 60

1 Patient data used in this study will be obtained from two different sources: the TORCH randomised  
2 trial and the UK Clinical Practices Research Datalink (CPRD) (linked to Hospital Episodes Statistics –  
3 HES – data).  
4  
5

#### 6 **TORCH**

7  
8 TORCH was a placebo controlled randomised trial of the combined inhaler fluticasone propionate  
9 (FP) + salmeterol (SAL) (FP/SAL) for the treatment of COPD, published in 2007. Patients were  
10 randomised to receive FP/SAL, FP alone, SAL alone or placebo and the primary comparison of  
11 interest was between FP/SAL and placebo.<sup>2</sup> Key outcomes were expected benefits (rate of COPD  
12 exacerbation and mortality) and an expected harm due to the immunosuppressive action of the  
13 corticosteroid FP (pneumonia). Whilst findings for the primary endpoint of mortality were null, this  
14 was thought to be due to poor statistical power as a result of a lower than anticipated mortality rate.  
15 Nonetheless, a lower rate of exacerbations was seen with FP/SAL, and a higher rate of pneumonia  
16 was observed. As one of the largest trials in COPD, and with three year follow up, TORCH is a  
17 landmark study, providing a validation point for our study. We will obtain individual patient data  
18 from the TORCH study via [www.clinicalstudydatarequest.com](http://www.clinicalstudydatarequest.com) for use in Objective 1 (see selection of  
19 participants section below)  
20  
21  
22  
23  
24  
25  
26

#### 27 **CPRD**

28  
29 The CPRD is a very large database of prospectively collected, anonymised UK population-based  
30 electronic health records. CPRD primary care records comprise ~8-10% of the UK population and  
31 contain comprehensive information on clinical diagnoses, prescribing, referrals, tests and  
32 demographic/lifestyle factors.<sup>8</sup> In order to contribute to the database, general practices and other  
33 health centres must meet prespecified standards for research-quality data (i.e. be “up to standard”).  
34 Data quality/validity are therefore high and the data are nationally representative.<sup>8,9</sup> A patient starts  
35 contributing follow-up time to the database at the date they join an “up to standard” practice (or  
36 the date that their practice starts contributing up to standard data), and stop contributing follow-up  
37 time on either their death date, their transfer out date (the date that they leave the database due to  
38 reasons other than death) or on the last collection date for their practice. Linkage between the  
39 primary care records in CPRD and hospital episode statistics (HES) is well established for >60% of  
40 practices in the CPRD, providing a data set augmented with detailed secondary care diagnostic and  
41 procedural records. Algorithms have been established to identify COPD, COPD exacerbations and  
42 pneumonia (both hospital and primary care managed) in CPRD/HES linked data (including validated  
43 algorithms for COPD and exacerbations).<sup>10-12</sup> See supplementary materials for a high-level overview  
44 of these algorithms.  
45  
46  
47  
48  
49  
50  
51  
52  
53  
54  
55  
56  
57  
58  
59  
60

1  
2  
3 **Figure 1: Overview of study objectives and sources of data for the COPD real-world medicines effects study (RCT=randomised controlled trial, CPRD=**  
4 **the UK Clinical Practice Research Datalink, FP/SAL=Fluticasone propionate + salmeterol)**  
5

6 [FIGURE 1 HERE]  
7

8 **A. Work performed by others prior to this study**

9 Of the total population of people with COPD, only a subset  
10 are included in RCTs of COPD treatments, based on the RCT  
11 inclusion/exclusion criteria. The RCT generates results that  
12 inform clinical practice, and the anonymised raw data for the  
13 study can be made available to other researchers via the  
14 Clinical Study Data Request website. For this study, the  
15 specific COPD treatment-RCT of interest is the TORCH trial,<sup>2</sup>  
16 investigating the effect of FP/SAL on COPD exacerbations.

17 **B. Work to be performed as part of this study**

18 1. Objective 1

19 A cohort of TORCH (RCT)-analogous patients will be selected  
20 from the UK Clinical Practice Research Datalink (CPRD), by  
21 matching people with COPD within CPRD to the records of  
22 people included in the trial. An analysis of the effect of  
23 FP/SAL on COPD exacerbations will then be performed on  
24 this TORCH-analogous CPRD cohort. If the results obtained  
25 are comparable to those obtained in the TORCH trial itself,  
26 this will serve as a validation step, showing that data from  
27 the non-interventional (“real-world”) CPRD source can  
28 reliably be used to study COPD treatment effects.

29 2. Objective 2

30 The validated analysis techniques used for Objective 1 will  
31 then be used to study people in CPRD who would not have  
32 been eligible for inclusion in an RCT due to their age and the  
33 presence of other comorbidities, and for whom the effect of  
34 FP/SAL is currently unknown.

35 3. Objective 3

36 The validated analysis techniques will then be used to study  
37 people with mild COPD only, who have been under-  
38 represented in RCTs, and for whom the effect of COPD  
39 treatments is unclear.  
40  
41  
42  
43  
44  
45  
46  
47

## Selection of participants

Participants will be selected from the CPRD from between the dates of 1<sup>st</sup> January 2004 and 1<sup>st</sup> January 2017. All patients will need to have been registered with an up-to standard practice for at least 12 months. Participant selection criteria will then vary by objective as detailed below.

### Objective 1: Validation of non-interventional methods by comparing with trial results

An overview of each of the steps for participant selection for Objective 1 is provided in Figure 2.

#### Step 1

We will select all patients in the CPRD with COPD who are eligible for HES-linkage and during the period covered by the linkage would have met the following TORCH study **inclusion** criteria:

- a diagnosis of COPD
- age 40-80 years
- smoking history
- lung function ( $FEV_1 < 60\%$  predicted,  $FEV_1/FVC$  ratio  $< 70\%$ )

An eligible-for-inclusion date will then be assigned as the date that all of the above inclusion criteria were met for the individual. We will then exclude any individual who has any of the following TORCH study **exclusion** criteria prior to their eligible-for-inclusion date:

- a diagnosis of asthma (within the previous 5 years)
- a diagnosis for any (non-COPD) respiratory disorder
- a record of lung surgery
- a diagnosis of alpha-1 antitrypsin deficiency
- evidence of drug or alcohol abuse
- a record of having received long-term oxygen therapy
- diagnoses for conditions likely to interfere with the TORCH trial or cause death within 3 years
- current use of oral corticosteroid therapy (defined as continuous use for greater than 6 weeks, with courses of oral corticosteroidsteroids separated by a period of less than 7 days considered as continuous use)
- any exposure to FP/SAL within the previous 4 weeks

Finally, in-line with the TORCH trial approach, anyone who has an exacerbation requiring oral corticosteroid therapy or hospitalisation during the run-in period (the 2-week period following eligibility) will also be excluded.

Feasibility counts in the CPRD indicate there are ~13,000 patients meeting these criteria (Figure 2). Given the limited information on how asthma exclusions were applied in the TORCH study, we will perform a sensitivity analysis in which the asthma exclusion is a diagnosis within the previous 1 year, rather than 5 years as specified above.

### Step 2

Next we will determine if/when these patients ever received FP/SAL. During any time between attaining TORCH eligibility and a subsequent prescription for FP/SAL, patients will be eligible for inclusion as an unexposed (to FP/SAL) patient in Objective 1. There may be multiple time periods within a person's record where eligibility as an unexposed patient is met (Figure 3). Feasibility work shows that between 1<sup>st</sup> January 2004 and 1<sup>st</sup> January 2017 there were ~11,000 TORCH eligible patients in CPRD who did not receive FP/SAL at the time they attained TORCH eligibility and therefore have at least one time period that means they are eligible for inclusion as an Objective 1 unexposed participant (Figure 2). Individuals in CPRD who have more than one unexposed eligibility period within their record (Figure 3) will be able to contribute more than once to the pool of unexposed participants (with the covariates and person-time contributed unique to the specific unexposed eligibility period).

### Step 3

Having obtained individual level patient data for TORCH participants from [clinicalstudydatarequest.com](http://clinicalstudydatarequest.com), we will then match each TORCH participant (n=6,112) 1:1 with the closest available unexposed patient record in the CPRD pool of FP/SAL untreated patients obtained in Step 2. Matching will be based on the following TORCH baseline characteristics:

- age
- sex
- body mass index
- previous treatment with:
  - inhaled corticosteroids
  - long acting beta-agonists
- history of COPD exacerbations
- history of cardiovascular disease
- lung function

Where an individual from CPRD has multiple unexposed "eligibility periods" that can be matched to a TORCH participant, the CPRD characteristics that will be matched on will be those from the beginning of the specific eligibility period.

Some of the TORCH inclusion criteria will not be fully assessable using CPRD data (e.g. we will be able to assess whether patients are smokers but will not always know their pack year history). Hence the inclusion/exclusion criteria are analogous with TORCH criteria but we acknowledge they are not identical. Identification of criteria will be done based on algorithms already determined and by the identification of clinical codes in the CPRD. For those individuals that have contributed multiple unexposed records to the pool of CPRD unexposed participants (Figure 3), after one of their unexposed records has been matched to a TORCH participant we will remove all of their other unexposed records (meaning that an individual can only appear once in the final TORCH-matched

1 unexposed cohort). We anticipate matching all or the majority of TORCH participants with a CPRD  
2 patient, giving us a pool of TORCH-analogous untreated patients within CPRD, with similar baseline  
3 characteristics as TORCH participants at the point of randomisation ( $n \sim 6,000$ , Figure 2).  
4

#### 6 *Step 4*

7 Following this, we will select all patients in CPRD meeting the TORCH eligibility criteria specified  
8 above, and who also received treatment with FP/SAL (either on the date of eligibility or at a later  
9 date). From feasibility work, we anticipate  $\sim 12,000$  eligible FP/SAL treated patients (Figure 2), some  
10 of whom may have multiple time-periods of treated patient eligibility and therefore could contribute  
11 more than once to the initial pool of treated patients (Figure 3). In contrast to the unexposed  
12 TORCH-eligible cohort, our initial approach will not involve matching participants of the exposed (to  
13 FP/SAL) TORCH-eligible cohort with participants from the TORCH trial, as this would negatively  
14 impact the ability to calculate propensity scores for receiving FP/SAL in Step 5. Note that there will  
15 be overlap between those selected as untreated (in Step 2) and as treated (in Step 4). Approximately  
16 90% of the Step 4 treated patients will also have been eligible as Step 2 untreated patients, as they  
17 will have had periods where they were not treated with FP/SAL and met the Step 2 untreated  
18 eligibility criteria in addition to separate periods where they were treated with FP/SAL and met the  
19 Step 4 treated eligibility criteria (Figure 3). If a person is included in both the untreated Step 2 and  
20 treated Step 4 cohorts, they will be contributing different periods of their person-time to each  
21 cohort (pre-FP/SAL treatment for Step 2 vs post-FP/SAL treatment for Step 4), and this will be  
22 handled in the analysis by assigning different index dates for Step 2 compared to Step 4.  
23  
24  
25  
26  
27  
28  
29  
30  
31  
32

#### 33 *Step 5*

34 We will combine the CPRD groups obtained in Steps 3 and 4 ( $n \sim 18,000$ , see note in Step 4 relating to  
35 90% overlap) and using their baseline characteristics will calculate propensity scores for receiving  
36 FP/SAL. The propensity score calculation will be based upon a wide range of covariates (see  
37 statistical analysis section for full details). Where a participant is contributing more than one treated  
38 time period record to the pool of exposed records (as described in Step 4), baseline characteristics  
39 will be updated at the beginning of each treatment-eligible period. Multiple eligible treatment  
40 periods from a single person are then included in the propensity score model as if they came from  
41 different individuals. The variables selected for the score will then become the basis for propensity  
42 score modelling in Objectives 2 and 3.  
43  
44  
45  
46  
47  
48

#### 49 *Step 6*

50 Each untreated patient derived in Step 3 ( $n \sim 6,000$ ) will be matched 1:1 with the FP/SAL treated  
51 patient record from Step 4 with the closest propensity score ( $\sim 12,000$ ) giving us an analysis  
52 population for Objective 1 of  $\sim 12,000$  patients – double the size of TORCH (Figure 2). For those  
53 individuals that have contributed multiple exposed records to the pool of CPRD exposed participants  
54 (Figure 3), after one of their exposed records has been propensity-score matched to an unexposed  
55  
56  
57  
58  
59  
60



1 participant, we will remove all other exposed records for that individual from the remaining pool of  
2 CPRD exposed participants. This will mean that an individual can only appear once as an exposed  
3 participant in the final propensity-score matched cohort.  
4  
5

6 We will also apply an alternative additional approach for Objective 1, where instead of generating  
7 and using propensity scores to obtain a final analysis population at Steps 5 and 6, we will match  
8 records from our exposed TORCH-eligible cohort with participants from the TORCH trial to create a  
9 TORCH-analogous exposed patient cohort. This will then be combined with the TORCH-analogous  
10 unexposed patient cohort to create a final analysis population (with multivariable regression  
11 techniques used to account for confounding instead of propensity scores).  
12  
13  
14  
15  
16  
17  
18  
19  
20  
21  
22  
23  
24  
25  
26  
27  
28  
29  
30  
31  
32  
33  
34  
35  
36  
37  
38  
39  
40  
41  
42  
43  
44  
45  
46  
47  
48  
49  
50  
51  
52  
53  
54  
55  
56  
57  
58  
59  
60

1 **Figure 2: Flowchart illustrating the planned selection of CPRD participants for Objective 1**  
2  
3 **of the COPD real-world medicines effects study**

4  
5 **[FIGURE 2 HERE]**  
6  
7  
8  
9  
10  
11  
12  
13  
14  
15  
16  
17  
18  
19  
20  
21  
22  
23  
24  
25  
26  
27  
28  
29  
30  
31  
32  
33  
34  
35  
36  
37  
38  
39  
40  
41  
42  
43  
44  
45  
46  
47  
48  
49  
50  
51  
52  
53  
54  
55  
56  
57  
58  
59  
60

**Note in relation to Step 5 (n~18,000) compared to Step 1 (n~13,000):** Approximately 90% of the treated patients will also have been eligible as untreated patients, as they did not receive FP/SAL on their TORCH-eligibility date. This means that they will have at least one period of time during which they are untreated-eligible but then did subsequently go-on to receive FP/SAL (meaning they have at least one period of time during which they are treated-eligible). If a person is included as both a treated and untreated participant, they will be contributing different periods of their person-time to each cohort (pre-FP/SAL treatment for the untreated versus post-FP/SAL treatment for treated), and this is handled in the analysis by assigning different index dates

**Figure 3: Example timeline for a person in CPRD who is eligible for participation in Objective 1, illustrating multiple periods of unexposed/exposed (FL/SAL untreated/treated) eligibility.**

[FIGURE 3 HERE]

**1. 1<sup>st</sup> date of study eligibility:** person meets TORCH eligibility as detailed in Objective 1, Step 1 on this date i.e. has a diagnosis of COPD, is between 0-80 years, FEV1<60% predicted and FEV1/FVC ratio <70%, smoking history, no asthma history, no lung surgery history, no long-term O<sub>2</sub> therapy, no alpha-1 antitrypsin deficiency, no drug/alcohol abuse, no exposure to FP/SAL within the previous 4 weeks.

**2. Eligible to enter study as an untreated participant:** patient can be selected as an untreated participant on any date within this period (as detailed in Step 2).

**3. Eligible to enter study as a treated participant:** FP/SAL treatment starts, patient is able to be selected as a treated study participant on the date that FP/SAL treatment starts (as detailed in Step 4).

**4. Eligible to enter study as an untreated participant:** patient stops treatment, but is not immediately eligible for selection again as an untreated study participant. After 4 weeks of no FP/SAL treatment however, they meet the TORCH eligibility criteria, and may be selected at any date during the remaining one untreated week as an untreated patient. This is the second untreated period that this person can contribute to the total pool of untreated period records that will be available for matching to the TORCH participants (as detailed in Steps 2 and 3).

**5. Eligible to enter study as a treated participant:** FP/SAL treatment (re)starts, patient can be selected as a treated study participant on the date that FP/SAL treatment (re)starts. This is the second treated period that this person can contribute to the total pool of treated period records that will be available for propensity score matching to the untreated participants (as detailed in Steps 4 to 6).

**Objective 2: Measurement of COPD treatment effects in patients excluded from trials**

We will select separate cohorts of patients who have a valid COPD diagnosis in the CPRD<sup>8</sup> and who would not have been eligible for inclusion in the TORCH trial (and therefore also not eligible for our Objective 1) due to the following characteristics: (1) age >80 years OR (2) history of lung surgery OR (3) history of long term oxygen therapy OR (4) evidence of drug/alcohol abuse OR (4) an asthma diagnosis at any time prior to inclusion OR (5) substantial comorbidity. In relation to substantial comorbidity, TORCH required people to be excluded from the trial if they had serious uncontrolled disease with a likelihood of causing death within 3 years. It is likely this criterion affected participant selection and led to a lower overall rate of death than originally anticipated, although we recognise this criterion is subjective. During Objective 1 we will be able to select groups of people who were generally not included despite being eligible, most likely because of this subjective exclusion criterion. We anticipate this will be people with substantial comorbidity e.g. serious vascular disease. Status for such diseases is readily identified in both the CPRD data and in the TORCH baseline data. We will only be able to specify this criterion in detail after we have completed Objective 1.

Participants for each of the Objective 2 cohorts will be selected in a similar fashion to the Objective 1 cohort, with the amended eligibility criteria specified above applied (i.e. Step 1 will be modified for selection of each of the Objective 2 cohorts). As for Objective 1, each participant will be allowed to

1 have multiple FP/SAL exposed and unexposed eligibility periods in their record, as described in  
2 Figure 3. In contrast to Objective 1, there will be no matching of unexposed patients to TORCH  
3 patients, as we do not require a TORCH-analogous cohort for this analysis (i.e. no Step 3). All other  
4 selection steps will be as applied for Objective 1, including the use of propensity score matching in  
5 order to obtain comparable unexposed and exposed groups for analysis.  
6  
7  
8

### 9 **Objective 3: Determination of treatment effects in an under-studied disease stage**

10 We will select separate cohorts of patients who have a valid COPD diagnosis in the CPRD<sup>8</sup> and who  
11 would not have been eligible for inclusion in the TORCH trial (or our Objective 1) due to the  
12 following characteristics: (1) >60% predicted FEV1 (or >50% plus MRC breathlessness scale 1 or 2, or  
13 >50% plus COPD Assessment Test (CAT) score <10) AND (2) no exacerbations in the year post COPD  
14 diagnosis. We will also perform a sensitivity analysis where we allow the group of people with FEV1  
15 >60% predicted who had a maximum of one exacerbation within 1 year post COPD diagnosis to be  
16 included. As for Objective 2, the selection steps will be similar to Objective 1, with modified criteria  
17 for step 1 and the removal of the TORCH-matching step (step 3).  
18  
19  
20  
21  
22  
23

## 24 **Exposures, outcomes and co-variates**

### 25 **Exposures**

26 For all objectives, exposures will be determined using CPRD prescribing records and code lists for  
27 COPD treatments (codelists provided in supplementary materials).  
28

29 For Objective 1, use of FP/SAL (tradename Seretide) is the primary exposure of interest and will be  
30 compared with no treatment with FP/SAL. We will limit included patients to those receiving Seretide  
31 500/50, the dose used in TORCH. This information is recorded for all prescriptions of Seretide and  
32 this dose is the only currently approved dose for COPD in the UK (though we recognise some  
33 prescribing may not follow the licensed indication). If the results for our FP/SAL vs no treatment  
34 comparison are not consistent with the TORCH FP/SAL vs placebo results (see Statistical analysis –  
35 Validation of results against TORCH section for a definition of consistent), we will perform additional  
36 analyses where instead of using a no-treatment comparator group, our Objective 1 comparator  
37 group will be people exposed to Salmeterol, one of the other comparator groups from the TORCH  
38 trial.  
39

40 As a secondary analysis in Objective 1 other treatments for COPD will also be compared with no  
41 treatment. Selection of unexposed and exposed people for each of these drugs will follow Steps 1 –  
42 6 detailed above in the Selection of Participants – Objective 1 section, although Step 3 will be  
43 omitted (as these cohorts will not need to be matched to TORCH). The other treatments we plan to  
44 include are as follows:  
45  
46  
47

48 a) long-acting beta agonist (LABA)  
49  
50  
51  
52  
53  
54  
55  
56  
57  
58  
59  
60

- 1 b) long-acting muscarinic antagonist (LAMA)
- 2 c) LABA + LAMA
- 3 d) LABA + inhaled corticosteroid (ICS) other than FP/SAL
- 4 e) LABA + LAMA + ICS

5  
6 For Objectives 2 and 3 we will again use recorded prescribing information to determine the dose  
7 received. We will be reliant mostly on the strength of each individual drug which is recorded  
8 automatically against each product and does not require GPs to enter this data, ensuring  
9 completeness. We will then be able to stratify analyses based on the dose prescribed. Specific  
10 exposures for Objectives 2 and 3 are as follows (all versus no treatment):  
11  
12  
13

- 14 a) FP/SAL
- 15 b) LABA
- 16 c) LAMA
- 17 d) LABA + LAMA
- 18 e) LABA + ICS
- 19 f) LABA + LAMA + ICS

## 21 Outcomes

22 Outcomes to be measured are as follows:

- 23 1. COPD exacerbation: to be defined using a CPRD-Hospital Episodes Statistics (HES) algorithm  
24 developed previously by authors of this study protocol<sup>10</sup>
- 25 2. All cause mortality: as recorded in ONS mortality statistics (data that is linked to CPRD data)
- 26 3. Pneumonia: as defined using a CPRD-HES algorithm published previously by authors of this  
27 study protocol<sup>11</sup>
- 28 4. Time to COPD treatment change: determined by prescribing records indicating the start of a  
29 new, additional COPD treatment

## 36 Covariates

37 Covariates to be considered for inclusion in the propensity score include the following (all obtained  
38 from CPRD data):  
39  
40

- 41 • Lung function (FEV1, FEV1/FVC)
- 42 • Age
- 43 • Gender
- 44 • Body mass index
- 45 • Alcohol consumption
- 46 • Vascular disease (broken into individual components e.g. hypertension, heart failure,  
47 atherosclerotic disease)
- 48 • Use of prescribed aspirin and statins
- 49 • Prior treatment with other COPD medication
- 50 • Type 2 diabetes
- 51 • History of cancer
- 52 • Renal disease
- 53 • Healthcare utilisation intensity (number of prior visits, hospitalisations, number of distinct  
54 medications used, number of procedures)

## Sample size

### Objective 1

Assuming a baseline conservative exacerbation rate of 0.5 per patient per year,<sup>10</sup> we would only require a sample of 408 patients per treatment group to detect a reduction in annual exacerbation rate to 0.4 per year, with 80% power and 5% significance. The estimated sample size is ~12,000 which will provide ample power for the main outcomes of interest, but also allow stratification by patient characteristics to determine stratified results, and will also be ample for the secondary analyses where we will use 99% confidence intervals. For example, to detect a reduction from 0.5 to 0.4 exacerbations per year with 80% power and 1% significance we would need ~600 people in each treatment group.

### Objectives 2 and 3

We are also confident that we will have sufficient numbers to allow well powered analyses for Objectives 2 and 3. For example a feasibility count looking at the number of people over the age of 80 eligible for inclusion in Objective 2 estimated that there would be >2,000 people in each exposure group.

## Statistical analysis

### Propensity score for addressing confounding

The propensity score will be constructed using the principle that predictors of the exposure and outcome, or outcome only (mortality) should be included. We will consider a wide range of factors for inclusion (as listed in the covariates section above), such as: age, sex, body mass index, alcohol consumption, and a wide range of comorbidities (e.g. type 2 diabetes, coronary heart disease, cerebrovascular disease, peripheral vascular disease, heart failure, hypertension, renal disease, cancer). We will further adjust for healthcare utilisation intensity (number of prior visits, hospitalisations, number of distinct medications used, number of procedures, etc.) as these are generic correlates of disease state and the likelihood of recording completeness. We have substantial prior experience of building propensity models<sup>13-15,16</sup>.

For the additional alternative approach to Objective 1 relying on matching of both unexposed and exposed patients to the TORCH trial patients (described in Selection of participants – Objective 1 – Step 6), we will use multivariable regression techniques to address confounding, considering a similar wide range of covariates for adjustment.

The variable list used for the propensity score model obtained in Objective 1 will be the basis for propensity score modelling in Objectives 2 and 3, but additional variables will also be considered given the different nature of the patient populations being studied in these Objectives.

## Methods of analysis

For all objectives, comparisons will be made according to FP/SAL (or other drugs being analysed as specified in the Exposure section) status for rate of COPD exacerbation, pneumonia and mortality over 3 years. All analyses will be performed according to the “intention-to-treat” principle (as was done in the TORCH study), meaning that if a participant enters the study as either an exposed or unexposed participant, they will remain assigned to that exposure category for the entire duration of their follow-up (irrespective as to whether their true exposure status changes). For exacerbations, a negative binomial model will be used, accounting for variability between patients in the number and frequency of exacerbations, with the number of exacerbations as the outcome and the log of treated time as an offset variable. Time to mortality, first pneumonia and treatment change will be analysed using Cox proportional hazards regression. This mirrors TORCH endpoints of major benefit and harm. We anticipate the propensity matching process will allow us to assemble treated and untreated groups that are very similar with respect to baseline characteristics except FP/SAL treatment status. However, this will be tested by assessing standardised differences for each baseline variable. If substantial differences are noted for important variables, it may be necessary to further adjust the statistical models. This could also include examining the effect of using greedy vs optimum matching approaches in order to obtain the closest propensity score match, and/or matching at a ratio other than 1:1.<sup>17</sup>

## Validation of results against TORCH

We will validate our findings against TORCH as part of Objective 1 by determining whether results of the CPRD FP/SAL versus no FP/SAL treatment analysis are compatible with the TORCH exacerbations rate ratio for FP/SAL versus placebo (0.75; 95% CI 0.69-0.81). This outcome has been selected as it is an outcome of key significance for people with COPD<sup>4</sup> and the result in TORCH shows a clear benefit with 95% confidence limits below 1. We have set two criteria that must be met for us to conclude results are consistent. First the effect size must be clinically comparable with TORCH findings; the rate ratio for exacerbations in CPRD must be between 0.65 and 0.9. This range is deliberately not symmetrical around the TORCH estimate of 0.75 as we would anticipate the treatment effect in routine clinical care may be weaker than that seen in the optimised setting of a randomised trial. We recognise this rule could be met with a poorly powered, inconclusive result, so a second criterion is that the 95% confidence interval for the rate ratio must exclude 1. If we go on to compare FP/SAL with Salmeterol alone (see Exposures, outcomes and co-variates section, Exposures subheading), the 95% confidence interval would also need to exclude 1, and the rate ratio would need to be between 0.81 and 0.95 (compared with the TORCH FP/SAL versus Salmeterol result of 0.88, 95% CI 0.81-0.95).

### **Handling measurement of adherence to medication**

Adherence to issued prescribing in general practice is likely to vary according to the treatment issued e.g. short course antibiotic treatment is notoriously not well adhered to, whereas long term life-saving treatment such as antiretroviral medication is more likely to be taken as prescribed. Whilst we do not have figures for adherence for COPD medication in UK general practice, we are able to estimate the proportion of time covered by prescribing as a proxy for adherence and will account for this in our analyses. Moreover, our intention is to estimate the effect of prescribing at the population level, and to some extent, the clinical effects we will measure are in part due to pharmacological effects, and in part the way the treatment is taken which includes adherence. Also of note, prescribing for COPD in the UK is predominantly through GPs and so we will not be missing prescribing information from other potential sources of treatment.

The data analysis for adherence will necessarily be a significant element of the work to be done for this study. However, we have reviewed the records for a random sample of 30 people with COPD starting treatment with FP/SAL to look at adherence patterns over the course of a year. Of the 30 patients, 20 (67%) were still receiving Seretide (FP/SAL) one year after starting treatment. Of the 20 who received Seretide for a full year, 15 (75%) received sufficient prescriptions to suggest at least 50% adherence over the year, and 8 (40%) had sufficient prescriptions to suggest 80% adherence or higher. As expected, this suggests two things: Firstly adherence is likely to be poorer in routine clinical care than in the trial population; in TORCH 80% of participants were estimated to have adherence at 80% or higher. Secondly there is a wide range of adherence in routine care. This will allow us to estimate both the population level effects of treatment as actually used in routine care, but also to estimate the treatment effect in patients with more similar levels of adherence to TORCH participants. Whilst we acknowledge that prescribing can only be a proxy for used medication, we believe it is not an unreasonable assumption that the amount of medication prescribed is correlated with the amount consumed. We plan to assess adherence for the cohort that we select for Objective 1 beyond 1 year and report the findings. In the event that Objective 1 detects a null or poorer treatment effect than anticipated (rate ratio > 0.9), we will conduct a sensitivity analysis restricted to people estimated to be covered by FP/SAL treatment for 80% of their follow up.

### **Misclassification of (1) drug exposure periods and (2) outcome status**

It is possible that an individual may still be exposed to FP/SAL for some time after a prescription has finished, for example if they have medication at home that they haven't used from a previous prescription. This would mean that people may become eligible for inclusion in the unexposed group while they are actually still exposed. If our result differs from the TORCH results (e.g. a rate ratio <0.65 or >0.9), we will conduct a sensitivity analysis in which we include an additional (grace) exposed period equivalent to the length of a single prescription at the end of each actual exposed



1 period, and only classify individuals as eligible for inclusion as unexposed at the end of this  
2 additional period.  
3

4 Our results could also be impacted by misclassification of outcome, given the routine nature of the  
5 data. Our initial approach for detection of COPD exacerbations is to use a validated case definition  
6 from previous work that maximises positive predictive value while maintaining a relatively high  
7 sensitivity.<sup>12</sup> If our result differs from the TORCH results, we will consider performing a sensitivity  
8 analysis in which we assess the impact of applying alternative case definitions for COPD  
9 exacerbations (see supplementary materials for an overview of articles relating to the case  
10 definitions we plan to utilise, including any validity measurements provided).  
11  
12  
13  
14  
15

### 16 **Missing data**

17 CPRD data are shown to be almost complete for drug prescribing and mortality (partly through ONS  
18 linkage). Smoking history tends to be very well recorded for people with COPD and missingness is  
19 likely to be minimal.<sup>10</sup> Information on important comorbidity is also well recorded in CPRD. We will  
20 conduct both complete record analyses and use multiple imputation where appropriate assumptions  
21 hold, applying findings from methodological work led by one of the study team (EW) into the use of  
22 multiple imputation in propensity score modelling.<sup>16</sup>  
23  
24  
25  
26  
27

## 28 **Ethics and dissemination**

### 29 **Approval by ethics and scientific committees**

30 Ethical approval for this study has been obtained from the London School of Hygiene & Tropical  
31 Medicine Ethics Committee (Ref: 11997).  
32

33 An application for scientific approval related to use of the CPRD data has been made to the  
34 Independent Scientific Advisory Committee (ISAC) of the Medicines and Healthcare Products  
35 Regulatory Agency. CPRD data are already approved via a National Research Ethics Committee for  
36 purely non-interventional research of this type.  
37

38 An application for use of the TORCH trial individual patient data was made to the  
39 clinicalstudydatarequest.com site, which is checked by the Wellcome Trust and relevant sponsors to  
40 make sure information is complete and that the sponsor's requirements for informed consent have  
41 been met. The application is then sent to an independent review panel that consider the scientific  
42 rationale, objectives, publication plan, conflicts of interest and qualifications and experience of the  
43 research team before making a decision on providing access to the data. We recently obtained  
44 approval of all aspects of this application.  
45  
46  
47  
48  
49  
50  
51  
52  
53  
54  
55  
56  
57  
58  
59  
60

## Dissemination plans

Dissemination of findings will be via a combination of channels. The work will be published in high ranking peer reviewed journals and we anticipate 3 publications to arise directly from the planned work. Findings will also be presented at relevant scientific conferences such as the British Thoracic Society Conference and the European Respiratory Society International Congress. We will also engage with patients already identified from a clinic run by one of the authors of this protocol (JQ) and from Breathe Easy Groups and with relevant charities such as the British Lung Foundation to determine the most relevant ways to disseminate results directly to patients in an accessible manner, and to help our understanding of the likely impact of results to specific groups of patients. We will communicate directly with NICE to ensure they are kept informed of results that are of direct relevance to the guidance they have issued on COPD, and with the Medicines and Healthcare Products Regulatory Agency if it appears that findings may impact the risk/benefit profile of COPD treatments.

## References

1. Comission H. Cleaning the air: a national study of chronic pulmonary disease. 2006.
2. Calverley PMA, Anderson JA, Celli B, Ferguson GT, Jenkins C, Jones PW, et al. Salmeterol and Fluticasone Propionate and Survival in Chronic Obstructive Pulmonary Disease. *N Engl J Med*. 2007 Feb 22;356(8):775–89.
3. Tashkin DP, Celli B, Senn S, Burkhart D, Kesten S, Menjoge S, et al. A 4-Year Trial of Tiotropium in Chronic Obstructive Pulmonary Disease. *N Engl J Med*. 2008 Oct 9;359(15):1543–54.
4. National Institute for Health and Care Excellence (NICE). Chronic obstructive pulmonary disease in over 16s: diagnosis and management | Guidance and guidelines | NICE. 2010;
5. Ferguson GT, Anzueto A, Fei R, Emmett A, Knobil K, Kalberg C, et al. Maintenance pharmacotherapy of mild and moderate COPD: what is the evidence? *Respir Med*. 2011 Sep;105(9):1268–74.
6. EU. REGULATION (EU) No 1235/2010 OF THE EUROPEAN PARLIAMENT AND OF THE COUNCIL. 2010.
7. Spring S. Guidance for Industry Postmarketing Studies and Clinical Trials — Implementation of Section 505(o)(3) of the Federal Food, Drug, and Cosmetic Act.
8. Herrett E, Gallagher AM, Bhaskaran K, Forbes H, Mathur R, Staa T van, et al. Data Resource Profile: Clinical Practice Research Datalink (CPRD). *Int J Epidemiol*. 2015 Jun;44(3):827–36.
9. Herrett E, Thomas SL, Schoonen WM, Smeeth L, Hall AJ. Validation and validity of diagnoses in the General Practice Research Database: a systematic review. *Br J Clin Pharmacol*. 2010 Jan;69(1):4–14.
10. Quint JK, Müllerova H, DiSantostefano RL, Forbes H, Eaton S, Hurst JR, et al. Validation of chronic obstructive pulmonary disease recording in the Clinical Practice Research Datalink (CPRD-GOLD). *BMJ Open*. 2014;4(7):e005540.
11. Millett ERC, Quint JK, Smeeth L, Daniel RM, Thomas SL. Incidence of Community-Acquired Lower Respiratory Tract Infections and Pneumonia among Older Adults in the United Kingdom: A Population-Based Study. Heimesaat MM, editor. *PLoS One*. 2013 Sep 11;8(9):e75131.
12. Rothnie KJ, Müllerová H, Hurst JR, Smeeth L, Davis K, Thomas SL, et al. Validation of the Recording of Acute Exacerbations of COPD in UK Primary Care Electronic Healthcare Records. Chotirmall SH, editor. *PLoS One*. 2016 Mar 9;11(3):e0151357.

- 1 13. Douglas I, Evans S, Smeeth L. Effect of statin treatment on short term mortality after  
2 pneumonia episode: cohort study. *BMJ*. 2011 Apr 6;342:d1642.
- 3
- 4 14. Williamson E, Morley R, Lucas A, Carpenter J. Propensity scores: From naïve enthusiasm to  
5 intuitive understanding. *Stat Methods Med Res*. 2012 Jun 24;21(3):273–93.
- 6
- 7
- 8 15. Root AA, Wong AYS, Ghebremichael-Weldeselassie Y, Smeeth L, Bhaskaran K, Evans SJW, et  
9 al. Evaluation of the risk of cardiovascular events with clarithromycin using both propensity  
10 score and self-controlled study designs. *Br J Clin Pharmacol*. 2016 Aug;82(2):512–21.
- 11
- 12
- 13 16. Leyrat C, Seaman SR, White IR, Douglas I, Smeeth L, Kim J, et al. Propensity score analysis  
14 with partially observed covariates: How should multiple imputation be used? *Stat Methods  
15 Med Res*. 2017 Jun 2;96228021771303.
- 16
- 17
- 18 17. Austin PC. An Introduction to Propensity Score Methods for Reducing the Effects of  
19 Confounding in Observational Studies. *Multivariate Behav Res*. 2011 May;46(3):399–424.
- 20
- 21
- 22
- 23
- 24

## 25 **Authors contributions**

26  
27  
28 KW, EW, JC, LW, SS, LS, JQ, ID contributed to study question and design. KW wrote the first draft of  
29 the protocol manuscript (based upon original grant/scientific approval applications to NIHR and ISAC  
30 that KW, EW, JC, LW, SS, LS, JQ and ID all contributed to). KW, EW, JC, LW, SS, LS, JQ, ID contributed  
31 to further drafts and approved the final version.  
32  
33

## 34 **Acknowledgements**

35  
36  
37 No information for this section.  
38

## 39 **Data sharing statement**

40  
41  
42 There are currently no unpublished data from this study, as it is a protocol.  
43

44 All of the data sources described can be accessed by making formal applications to the owners of the  
45 data (i.e. CPRD/HES data for the routinely collected non-interventional data and  
46 clinicalstudyrequest.com for the trial data used for validation of non-interventional methods).  
47  
48  
49  
50  
51  
52  
53  
54  
55  
56  
57  
58  
59

## Figure legends

**Figure 1: Overview of study objectives and sources of data for the COPD real-world medicines effects study (RCT=randomised controlled trial, CPRD= the UK Clinical Practice Research Datalink, FP/SAL=Fluticasone propionate + salmeterol)**

**Figure 2: Flowchart illustrating the planned selection of CPRD participants for Objective 1 of the COPD real-world medicines effects study**

**Figure 3: Example timeline for a person in CPRD who is eligible for participation in Objective 1, illustrating multiple periods of unexposed/exposed (FL/SAL untreated/treated) eligibility.**

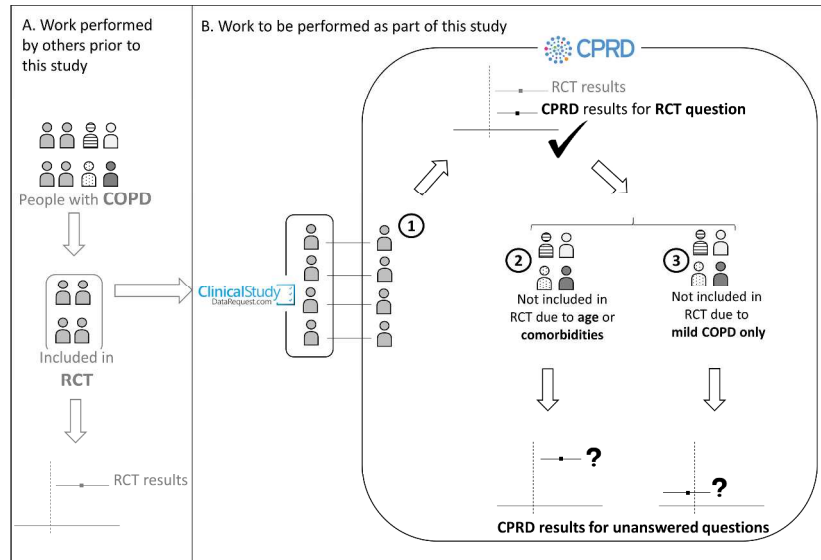

25  
26  
27  
28  
29

Figure 1: Overview of study objectives and sources of data for the COPD real-world medicines effects study (RCT=randomised controlled trial, CPRD= the UK Clinical Practice Research Datalink, FP/SAL=Fluticasone propionate + salmeterol)

30  
31  
32  
33  
34  
35  
36  
37  
38  
39  
40  
41  
42  
43  
44  
45  
46  
47  
48  
49

338x190mm (300 x 300 DPI)

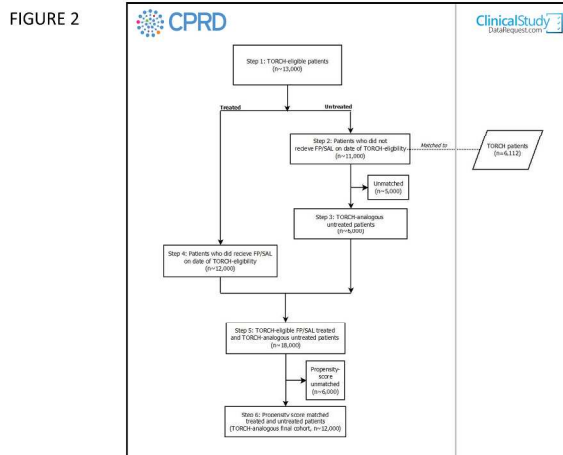

Figure 2: Flowchart illustrating the planned selection of CPRD participants for Objective 1 of the COPD real-world medicines effects study

338x190mm (300 x 300 DPI)

1  
2  
3  
4  
5  
6  
7  
8  
9  
10  
11  
12  
13  
14  
15  
16  
17  
18  
19  
20  
21  
22  
23  
24  
25  
26  
27  
28  
29  
30  
31  
32  
33  
34  
35  
36  
37  
38  
39  
40  
41  
42  
43  
44  
45  
46  
47  
48  
49  
50  
51  
52  
53  
54  
55  
56  
57  
58  
59  
60

FIGURE 3

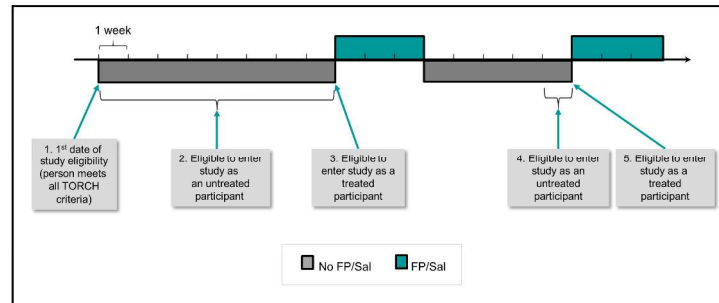

Figure 3: Example timeline for a person in CPRD who is eligible for participation in Objective 1, illustrating multiple periods of unexposed/exposed (FL/SAL untreated/treated) eligibility.

338x190mm (300 x 300 DPI)

Review only



## Overview of algorithms to be used for detecting COPD, COPD exacerbations and pneumonia

| Condition         | Paper (author, year)              | Algorithm description <sup>1</sup>                                                                                                                                                                                                                                                                                                                                                                 | Validity <sup>2</sup>                            | Other notes                                                                                                                                                                                                                                                                            |
|-------------------|-----------------------------------|----------------------------------------------------------------------------------------------------------------------------------------------------------------------------------------------------------------------------------------------------------------------------------------------------------------------------------------------------------------------------------------------------|--------------------------------------------------|----------------------------------------------------------------------------------------------------------------------------------------------------------------------------------------------------------------------------------------------------------------------------------------|
| COPD              | Quint et al, 2014 <sup>10</sup>   | - CPRD <sup>3</sup> diagnostic (Read) code for COPD                                                                                                                                                                                                                                                                                                                                                | PPV <sup>4</sup> : 87% (78 – 92)                 | <ol style="list-style-type: none"> <li>1. Comparison with gold standard of respiratory physician review of information obtained by questionnaire from GPs</li> <li>2. 8 algorithms presented in total, PPVs ranging from 12 to 89</li> </ol>                                           |
| COPD exacerbation | Rothnie et al, 2016 <sup>12</sup> | <ul style="list-style-type: none"> <li>- CPRD diagnostic (Read) code for LRTI or Acute Exacerbation COPD (AECOPD) <b>OR</b></li> <li>- A prescription of a COPD-specific antibiotic combined with OCS for 5-14 days <b>OR</b></li> <li>- A record (Read code) of two or more respiratory symptoms of AECOPD with a prescription of COPD-specific antibiotics and/or OCS on the same day</li> </ul> | PPV: 86% (83 – 88)<br>Sensitivity: 63% (55 – 70) | <ol style="list-style-type: none"> <li>1. Comparison with gold standard of respiratory physician review of information obtained by questionnaire from GPs</li> <li>2. 15 algorithms presented in total, PPVs ranging from 61% – 100%, sensitivities ranging from 1.6% – 63%</li> </ol> |
| Pneumonia         | Millet et al, 2013 <sup>11</sup>  | <ul style="list-style-type: none"> <li>- CPRD diagnostic (Read) codes and HES<sup>5</sup> diagnostic (ICD-10) codes for pneumonia (identified as a subset of an initial search for LRTI codes)</li> <li>- Records in both database within the 28 days considered the same illness-episode</li> </ul>                                                                                               | No validation performed                          |                                                                                                                                                                                                                                                                                        |

**Note 1:** Main algorithm presented in article and to be applied initially in COPD medications real-world effects study (details on other algorithms presented in paper provided in the “Other notes” column where appropriate). **Note 2:** Validity=measure of validity presented in article:result obtained (95% CI). **Note 3:** CPRD=UK Clinical Practice Research Datalink **Note 4:** PPV=positive predictive value **Note 5:** HES=Hospital Episode Statistics

## LAMA codes

| Product code | BNF header                           | Drug substance                            | Drug product                                                                                           |
|--------------|--------------------------------------|-------------------------------------------|--------------------------------------------------------------------------------------------------------|
| 61176        | compound bronchodilator preparations | vilanterol trifenate/umeclidinium bromide | anoro ellipta 55micrograms/dose / 22micrograms/dose dry powder inhaler (glaxosmithkline uk ltd)        |
| 61490        | compound bronchodilator preparations |                                           | umeclidinium bromide 65micrograms/dose / vilanterol 22micrograms/dose dry powder inhaler               |
| 35014        | antimuscarinic bronchodilators       | tiotropium bromide monohydrate            | tiotropium bromide 18microgram inhalation powder capsules with device                                  |
| 6474         | antimuscarinics                      | glycopyrronium bromide                    | robinul 1mg tablet (idis world medicines)                                                              |
| 50577        | antimuscarinic bronchodilators       | tiotropium bromide                        | spiriva 18microgram inhalation powder capsules with handihaler (de pharmaceuticals)                    |
| 35011        | antimuscarinic bronchodilators       | tiotropium bromide monohydrate            | tiotropium bromide 18microgram inhalation powder capsules                                              |
| 49227        | antimuscarinic bronchodilators       |                                           | aclidinium bromide 375micrograms/dose dry powder inhaler                                               |
| 50103        | antimuscarinic bronchodilators       |                                           | spiriva 18microgram inhalation powder capsules with handihaler (waymade healthcare plc)                |
| 7908         | antimuscarinics                      | glycopyrronium bromide                    | robinul 2mg tablet (wyeth pharmaceuticals)                                                             |
| 59638        | antimuscarinic bronchodilators       |                                           | spiriva 18microgram inhalation powder capsules with handihaler (sigma pharmaceuticals plc)             |
| 51967        | antimuscarinic bronchodilators       | tiotropium bromide                        | spiriva 18microgram inhalation powder capsules (mawdsley-brooks & company ltd)                         |
| 53982        | antimuscarinic bronchodilators       |                                           | seebri breezhaler 44microgram inhalation powder capsules with device (novartis pharmaceuticals uk ltd) |
| 6050         | antimuscarinic bronchodilators       | tiotropium bromide                        | spiriva 18 microgram capsule (boehringer ingelheim ltd)                                                |
| 7597         | other ulcer healing drugs            | glycopyrronium bromide                    | glycopyrronium bromide 2mg tablets                                                                     |
| 49228        | antimuscarinic bronchodilators       |                                           | eklira 322micrograms/dose genuair (almirall ltd)                                                       |
| 59173        | other ulcer healing drugs            | glycopyrronium bromide                    | glycopyrronium bromide 200micrograms/5ml oral suspension                                               |

| Product code | BNF header                     | Drug substance         | Drug product                                                                                                 |
|--------------|--------------------------------|------------------------|--------------------------------------------------------------------------------------------------------------|
| 36864        | antimuscarinic bronchodilators | tiotropium bromide     | tiotropium bromide 2.5micrograms/dose solution for inhalation cartridge with device cfc free                 |
| 55911        | other ulcer healing drugs      | glycopyrronium bromide | glycopyrronium bromide 500micrograms/5ml oral solution                                                       |
| 34995        | antimuscarinic bronchodilators | tiotropium bromide     | spiriva 18microgram inhalation powder capsules with handihaler (boehringer ingelheim ltd)                    |
| 35000        | antimuscarinic bronchodilators | tiotropium bromide     | spiriva 18microgram inhalation powder capsules (boehringer ingelheim ltd)                                    |
| 29138        | other ulcer healing drugs      | glycopyrronium bromide | glycopyrronium bromide 1mg/5ml oral solution                                                                 |
| 47269        | other ulcer healing drugs      | glycopyrronium bromide | glycopyrronium bromide 1mg/5ml oral suspension                                                               |
| 54151        | other ulcer healing drugs      | glycopyrronium bromide | glycopyrronium bromide 600micrograms/5ml oral suspension                                                     |
| 55795        | other ulcer healing drugs      | glycopyrronium bromide | glycopyrronium bromide 500micrograms/5ml oral suspension                                                     |
| 38377        | other ulcer healing drugs      | glycopyrronium bromide | glycopyrronium bromide 2mg/5ml oral solution                                                                 |
| 7218         | other ulcer healing drugs      | glycopyrronium bromide | glycopyrronium bromide 1mg tablets                                                                           |
| 36869        | antimuscarinic bronchodilators | tiotropium bromide     | spiriva respimat 2.5micrograms/dose solution for inhalation cartridge with device (boehringer ingelheim ltd) |
| 62109        | antimuscarinic bronchodilators |                        | umeclidinium bromide 65micrograms/dose dry powder inhaler                                                    |
| 50292        | antimuscarinic bronchodilators |                        | spiriva 18microgram inhalation powder capsules (sigma pharmaceuticals plc)                                   |
| 55794        | other ulcer healing drugs      | glycopyrronium bromide | glycopyrronium bromide 5mg/5ml oral suspension                                                               |
| 50047        | other ulcer healing drugs      | glycopyrronium bromide | glycopyrronium bromide 5mg/5ml oral solution                                                                 |
| 56262        | other ulcer healing drugs      | glycopyrronium bromide | glycopyrronium bromide 200micrograms/5ml oral solution                                                       |
| 61879        | antimuscarinic bronchodilators |                        | incuse ellipta 55micrograms/dose dry powder inhaler (glaxosmithkline uk ltd)                                 |
| 53761        | antimuscarinic bronchodilators |                        | glycopyrronium bromide 55microgram inhalation powder capsules with device                                    |
| 746          | antimuscarinic bronchodilators | tiotropium bromide     | tiotropium 18 microgram capsule                                                                              |
| 38538        | other ulcer healing drugs      | glycopyrronium bromide | glycopyrronium bromide 2mg/5ml oral suspension                                                               |
| 46214        | antimuscarinics                | glycopyrronium bromide | glycopyrronium bromide 5mg/5ml oral solution                                                                 |

| Product code | BNF header                     | Drug substance     | Drug product                                                                                               |
|--------------|--------------------------------|--------------------|------------------------------------------------------------------------------------------------------------|
| 61582        | antimuscarinic bronchodilators | tiotropium bromide | spiriva respimat 2.5micrograms/dose solution for inhalation cartridge with device (waymade healthcare plc) |

## LABA codes

| Product code | BNF header                                | Drug substance                | Drug product                                                                                 |
|--------------|-------------------------------------------|-------------------------------|----------------------------------------------------------------------------------------------|
| 45610        | selective beta 2 agonists                 | indacaterol maleate           | indacaterol 300microgram inhalation powder capsules with device                              |
| 7270         | selective beta 2 agonists                 | salmeterol xinafoate          | salmeterol 25micrograms/dose inhaler cfc free                                                |
| 10968        | selective beta 2 agonists                 | formoterol fumarate dihydrate | foradil 12microgram inhalation powder capsules with device (novartis pharmaceuticals uk ltd) |
| 549          | unknown                                   | salmeterol xinafoate          | serevent 25micrograms/dose inhaler (glaxosmithkline uk ltd)                                  |
| 7133         | selective beta 2 agonists                 | formoterol fumarate dihydrate | formoterol 12micrograms/dose dry powder inhaler                                              |
| 54742        | selective beta 2 agonists                 | salmeterol xinafoate          | salmeterol 25micrograms/dose inhaler cfc free (a a h pharmaceuticals ltd)                    |
| 719          | selective beta 2 agonists                 | salmeterol xinafoate          | salmeterol 50micrograms/dose dry powder inhaler                                              |
| 57694        | selective beta 2 agonists                 | salmeterol xinafoate          | vertine 25micrograms/dose inhaler cfc free (teva uk ltd)                                     |
| 26829        | selective beta 2 agonists                 | tulobuterol                   | brelomax 2mg tablet (abbott laboratories ltd)                                                |
| 19799        | selective beta 2 agonists                 | tulobuterol                   | tulobuterol 2mg                                                                              |
| 56482        | selective beta 2 agonists                 | formoterol fumarate dihydrate | oxis 12 turbohaler (waymade healthcare plc)                                                  |
| 25784        | selective beta 2 agonists                 | formoterol fumarate dihydrate | atimos modulite 12micrograms/dose inhaler (chiesi ltd)                                       |
| 47638        | selective beta 2 agonists                 | salmeterol xinafoate          | neevent 25micrograms/dose inhaler cfc free (kent pharmaceuticals ltd)                        |
| 10672        | peripheral vasodilators and related drugs | moxisylyte hydrochloride      | opilon 40mg tablet (concord pharmaceuticals ltd)                                             |
| 50051        | selective beta 2 agonists                 | salmeterol xinafoate          | serevent 25micrograms/dose evohaler (waymade healthcare plc)                                 |
| 35725        | selective beta 2 agonists                 | formoterol fumarate dihydrate | formoterol easyhaler 12micrograms/dose dry powder inhaler (orion pharma (uk) ltd)            |

| Product code | BNF header                                | Drug substance                | Drug product                                                                                            |
|--------------|-------------------------------------------|-------------------------------|---------------------------------------------------------------------------------------------------------|
| 2224         | selective beta 2 agonists                 | salmeterol xinafoate          | serevent 50micrograms/dose accuhaler (glaxosmithkline uk ltd)                                           |
| 43893        | selective beta 2 agonists                 | indacaterol maleate           | onbrez breezhaler 150microgram inhalation powder capsules with device (novartis pharmaceuticals uk ltd) |
| 6526         | selective beta 2 agonists                 | formoterol fumarate dihydrate | formoterol 12microgram inhalation powder capsules with device                                           |
| 43738        | selective beta 2 agonists                 | indacaterol maleate           | indacaterol 150microgram inhalation powder capsules with device                                         |
| 35825        | selective beta 2 agonists                 | salmeterol xinafoate          | serevent 50microgram disks (glaxosmithkline uk ltd)                                                     |
| 43764        | peripheral vasodilators and related drugs | moxisylyte hydrochloride      | opilon 40mg tablets (archimedes pharma uk ltd)                                                          |
| 56478        | selective beta 2 agonists                 | salmeterol xinafoate          | serevent 50micrograms/dose accuhaler (de pharmaceuticals)                                               |
| 42103        | selective beta 2 agonists                 | tulobuterol                   | tulobuterol 1mg/5ml sugar free syrup                                                                    |
| 57544        | selective beta 2 agonists                 | salmeterol xinafoate          | serevent 50micrograms/dose accuhaler (waymade healthcare plc)                                           |
| 3297         | selective beta 2 agonists                 | salmeterol xinafoate          | salmeterol 50micrograms disc                                                                            |
| 57558        | selective beta 2 agonists                 | formoterol fumarate dihydrate | oxis 6 turbohaler (lexon (uk) ltd)                                                                      |
| 9711         | selective beta 2 agonists                 | formoterol fumarate dihydrate | formoterol 6micrograms/dose dry powder inhaler                                                          |
| 35542        | selective beta 2 agonists                 | salmeterol xinafoate          | salmeterol 50microgram inhalation powder blisters with device                                           |
| 465          | unknown                                   | salmeterol xinafoate          | salmeterol 25micrograms/dose inhaler                                                                    |
| 44064        | selective beta 2 agonists                 | indacaterol maleate           | onbrez breezhaler 300microgram inhalation powder capsules with device (novartis pharmaceuticals uk ltd) |
| 35165        | selective beta 2 agonists                 | salmeterol xinafoate          | serevent 50microgram disks with diskhaler (glaxosmithkline uk ltd)                                      |
| 14306        | selective beta 2 agonists                 | formoterol fumarate dihydrate | formoterol 12micrograms/dose inhaler cfc free                                                           |
| 1974         | selective beta 2 agonists                 | formoterol fumarate dihydrate | oxis 12 turbohaler (astrazeneca uk ltd)                                                                 |
| 7268         | selective beta 2 agonists                 | salmeterol xinafoate          | serevent 25micrograms/dose evohaler (glaxosmithkline uk ltd)                                            |
| 8365         | peripheral vasodilators and related drugs | moxisylyte hydrochloride      | moxisylyte 40mg tablets                                                                                 |
| 35503        | selective beta 2 agonists                 | salmeterol xinafoate          | salmeterol 50microgram inhalation powder blisters                                                       |
| 1975         | selective beta 2 agonists                 | formoterol fumarate dihydrate | oxis 6 turbohaler (astrazeneca uk ltd)                                                                  |
| 22663        | selective beta 2 agonists                 | tulobuterol                   | respacal 2mg tablet (ucb pharma ltd)                                                                    |

1  
2  
3  
4  
5  
6  
7  
8  
9  
10  
11  
12  
13  
14  
15  
16  
17  
18  
19  
20  
21  
22  
23  
24  
25  
26  
27  
28  
29  
30  
31  
32  
33  
34  
35  
36  
37  
38  
39  
40  
41  
42  
43  
44  
45  
46

| Product code | BNF header                | Drug substance       | Drug product                                                             |
|--------------|---------------------------|----------------------|--------------------------------------------------------------------------|
| 910          | selective beta 2 agonists | salmeterol xinafoate | serevent diskhaler 50microgram inhalation powder (glaxo wellcome uk ltd) |

For peer review only

## ICS codes

| Product code | BNF header                                   | Drug substance             | Drug product                                                                     |
|--------------|----------------------------------------------|----------------------------|----------------------------------------------------------------------------------|
| 54399        | corticosteroids (for respiratory conditions) | beclometasone dipropionate | qvar 100 autohaler (sigma pharmaceuticals plc)                                   |
| 959          | unknown                                      | budesonide                 | budesonide 50micrograms/dose inhaler                                             |
| 2951         | corticosteroids (for respiratory conditions) | fluticasone propionate     | fluticasone 250microgram/actuation pressurised inhalation                        |
| 50129        | corticosteroids (for respiratory conditions) | beclometasone dipropionate | qvar 100micrograms/dose easi-breathe inhaler (de pharmaceuticals)                |
| 2229         | corticosteroids (for respiratory conditions) | beclometasone dipropionate | becodisks 100microgram disc (allen & hanburys ltd)                               |
| 3989         | corticosteroids (for respiratory conditions) | fluticasone propionate     | flixtotide 100microgram disc (allen & hanburys ltd)                              |
| 5551         | corticosteroids (for respiratory conditions) | fluticasone propionate     | flixtotide 0.5mg/2ml nebulas (glaxosmithkline uk ltd)                            |
| 34794        | corticosteroids (for respiratory conditions) | beclometasone dipropionate | beclometasone 200micrograms/dose inhaler (a a h pharmaceuticals ltd)             |
| 41269        | corticosteroids (for respiratory conditions) | beclometasone dipropionate | beclometasone 400 cyclocaps (teva uk ltd)                                        |
| 29325        | corticosteroids (for respiratory conditions) | beclometasone dipropionate | beclometasone 250micrograms/dose inhaler (generics (uk) ltd)                     |
| 4499         | corticosteroids (for respiratory conditions) | beclometasone dipropionate | aerobec 250microgram/actuation pressurised inhalation (meda pharmaceuticals ltd) |
| 57589        | corticosteroids (for respiratory conditions) | beclometasone dipropionate | becloforte 250micrograms/dose inhaler (dowelhurst ltd)                           |
| 32874        | corticosteroids (for respiratory conditions) | beclometasone dipropionate | beclometasone 50microgram/actuation inhalation powder (actavis uk ltd)           |
| 2159         | corticosteroids (for respiratory conditions) | beclometasone dipropionate | aerobec 50 autohaler (meda pharmaceuticals ltd)                                  |
| 14590        | corticosteroids (for respiratory conditions) | beclometasone dipropionate | asmabec 250microgram/actuation spacehaler (celltech pharma europe ltd)           |
| 1725         | corticosteroids (for respiratory conditions) | beclometasone dipropionate | beclazone 50 easi-breathe inhaler (teva uk ltd)                                  |
| 908          | corticosteroids (for respiratory conditions) | budesonide                 | pulmicort 400 turbohaler (astrazeneca uk ltd)                                    |
| 35288        | corticosteroids (for respiratory conditions) | beclometasone dipropionate | beclometasone 400microgram inhalation powder blisters                            |
| 49367        | corticosteroids (for respiratory conditions) | beclometasone dipropionate | clenil modulite 50micrograms/dose inhaler (mawdsley-brooks & company ltd)        |
| 35107        | corticosteroids (for respiratory conditions) | beclometasone dipropionate | beclometasone 400microgram inhalation powder blisters with device                |

| Product code | BNF header                                   | Drug substance             | Drug product                                                                           |
|--------------|----------------------------------------------|----------------------------|----------------------------------------------------------------------------------------|
| 1676         | corticosteroids (for respiratory conditions) | fluticasone propionate     | flixtide 125microgram/actuation inhalation powder (allen & hanburys ltd)               |
| 49772        | corticosteroids (for respiratory conditions) | fluticasone propionate     | fluticasone 250micrograms/dose evohaler (sigma pharmaceuticals plc)                    |
| 48088        | unknown                                      | budesonide                 | budenofalk 9mg gastro-resistant granules sachets (dr. falk pharma uk ltd)              |
| 33258        | corticosteroids (for respiratory conditions) | beclometasone dipropionate | beclometasone 250micrograms/dose inhaler (a a h pharmaceuticals ltd)                   |
| 13037        | corticosteroids (for respiratory conditions) | beclometasone dipropionate | pulvinal beclometasone dipropionate 200micrograms/dose dry powder inhaler (chiesi ltd) |
| 19031        | corticosteroids (for respiratory conditions) | beclometasone dipropionate | bdp 100microgram/actuation spacehaler (celltech pharma europe ltd)                     |
| 16158        | corticosteroids (for respiratory conditions) | beclometasone dipropionate | clenil modulite 50micrograms/dose inhaler (chiesi ltd)                                 |
| 2124         | unknown                                      |                            | pulmicort refill 200 mcg inh                                                           |
| 4759         | corticosteroids (for respiratory conditions) | beclometasone dipropionate | beclometasone 100microgram inhalation powder capsules                                  |
| 3753         | unknown                                      |                            | flixtide diskhaler-community pack 250 mcg                                              |
| 49711        | corticosteroids (for respiratory conditions) | budesonide                 | pulmicort 200micrograms/dose inhaler (astrazeneca uk ltd)                              |
| 15326        | corticosteroids (for respiratory conditions) | beclometasone dipropionate | beclometasone 100micrograms/dose inhaler cfc free                                      |
| 2335         | corticosteroids (for respiratory conditions) | beclometasone dipropionate | qvar 100 inhaler (teva uk ltd)                                                         |
| 5580         | corticosteroids (for respiratory conditions) | fluticasone propionate     | flixtide accuhaler 50 50microgram/inhalation inhalation powder (allen & hanburys ltd)  |
| 51681        | corticosteroids (for respiratory conditions) | beclometasone dipropionate | qvar 100 inhaler (sigma pharmaceuticals plc)                                           |
| 8433         | corticosteroids (for respiratory conditions) | budesonide                 | budesonide 100micrograms/actuation inhaler                                             |
| 9577         | corticosteroids (for respiratory conditions) | beclometasone dipropionate | asmabec 50 clickhaler (focus pharmaceuticals ltd)                                      |
| 2723         | corticosteroids (for respiratory conditions) | fluticasone propionate     | fluticasone 25micrograms/dose inhaler                                                  |
| 23675        | unknown                                      |                            | pulmicort l.s. refill                                                                  |
| 35638        | corticosteroids (for respiratory conditions) | fluticasone propionate     | fluticasone propionate 100microgram inhalation powder blisters with device             |
| 9571         | corticosteroids (for respiratory conditions) | beclometasone dipropionate | beclometasone 250micrograms/actuation vortex inhaler                                   |
| 51234        | corticosteroids (for respiratory conditions) | beclometasone dipropionate | qvar 100 inhaler (waymade healthcare plc)                                              |



| Product code | BNF header                                   | Drug substance             | Drug product                                                                           |
|--------------|----------------------------------------------|----------------------------|----------------------------------------------------------------------------------------|
| 60946        | corticosteroids (in chronic bowel disorders) | budesonide                 | entocort cr 3mg capsules (waymade healthcare plc)                                      |
| 5223         | corticosteroids (for respiratory conditions) | fluticasone propionate     | fluticasone 50micrograms/dose inhaler cfc free                                         |
| 53057        | corticosteroids (for respiratory conditions) | fluticasone propionate     | flixtide 50micrograms/dose evohaler (lexon (uk) ltd)                                   |
| 13290        | corticosteroids (for respiratory conditions) | beclometasone dipropionate | clenil modulite 100micrograms/dose inhaler (chiesi ltd)                                |
| 42928        | corticosteroids (for respiratory conditions) | fluticasone propionate     | flixtide 100micrograms/dose accuhaler (glaxosmithkline uk ltd)                         |
| 14736        | corticosteroids (for respiratory conditions) | beclometasone dipropionate | pulvinal beclometasone dipropionate 400micrograms/dose dry powder inhaler (chiesi ltd) |
| 52806        | corticosteroids (for respiratory conditions) | beclometasone dipropionate | qvar 100 autohaler (lexon (uk) ltd)                                                    |
| 57525        | corticosteroids (for respiratory conditions) | fluticasone propionate     | flixtide 250micrograms/dose accuhaler (stephar (u.k.) ltd)                             |
| 33849        | corticosteroids (for respiratory conditions) | beclometasone dipropionate | beclometasone 100microgram/actuation inhalation powder (neo laboratories ltd)          |
| 52732        | corticosteroids (for respiratory conditions) | budesonide                 | pulmicort 0.5mg respules (necessity supplies ltd)                                      |
| 35611        | corticosteroids (for respiratory conditions) | fluticasone propionate     | flixtide 250microgram disks (glaxosmithkline uk ltd)                                   |
| 8111         | corticosteroids (for respiratory conditions) | beclometasone dipropionate | becloforte vm 250microgram/actuation vm pack (allen & hanburys ltd)                    |
| 39879        | unknown                                      | budesonide                 | budesonide 200micrograms/dose inhaler cfc free                                         |
| 1242         | corticosteroids (for respiratory conditions) | beclometasone dipropionate | beclometasone 250micrograms/dose inhaler                                               |
| 26665        | unknown                                      |                            | pulmicort complete                                                                     |
| 37447        | corticosteroids (for respiratory conditions) | fluticasone propionate     | fluticasone propionate 50microgram inhalation powder blisters                          |
| 5718         | corticosteroids (for respiratory conditions) | fluticasone propionate     | flixtide 125micrograms/dose evohaler (glaxosmithkline uk ltd)                          |
| 7653         | corticosteroids (for respiratory conditions) | beclometasone dipropionate | beclometasone 400microgram inhalation powder capsules                                  |
| 28640        | corticosteroids (for respiratory conditions) | beclometasone dipropionate | beclometasone 100microgram/actuation inhalation powder (actavis uk ltd)                |
| 4365         | corticosteroids (for respiratory conditions) | beclometasone dipropionate | beclometasone 100micrograms disc                                                       |
| 34739        | corticosteroids (for respiratory conditions) | beclometasone dipropionate | beclometasone 50micrograms/dose inhaler (teva uk ltd)                                  |
| 8635         | corticosteroids (for respiratory conditions) | fluticasone propionate     | flixtide 50microgram disc (allen & hanburys ltd)                                       |

| Product code | BNF header                                   | Drug substance             | Drug product                                                                       |
|--------------|----------------------------------------------|----------------------------|------------------------------------------------------------------------------------|
| 57579        | corticosteroids (for respiratory conditions) | fluticasone propionate     | flixtotide 50micrograms/dose accuhaler (de pharmaceuticals)                        |
| 4413         | corticosteroids (for respiratory conditions) | beclometasone dipropionate | qvar 100 autohaler (teva uk ltd)                                                   |
| 37203        | corticosteroids (in chronic bowel disorders) | beclometasone dipropionate | beclometasone 5mg gastro-resistant modified-release tablets                        |
| 4132         | corticosteroids (for respiratory conditions) | fluticasone propionate     | fluticasone 125microgram/actuation pressurised inhalation                          |
| 3018         | corticosteroids (for respiratory conditions) | beclometasone dipropionate | beclometasone 50micrograms/dose inhaler                                            |
| 9233         | corticosteroids (for respiratory conditions) | beclometasone dipropionate | beclometasone 200microgram inhalation powder capsules                              |
| 2160         | corticosteroids (for respiratory conditions) | beclometasone dipropionate | beclometasone 50micrograms/dose breath actuated inhaler                            |
| 2148         | corticosteroids (for respiratory conditions) | beclometasone dipropionate | beclometasone 400microgram disc                                                    |
| 34919        | corticosteroids (for respiratory conditions) | beclometasone dipropionate | beclometasone 50micrograms/dose inhaler (a a h pharmaceuticals ltd)                |
| 2092         | corticosteroids (for respiratory conditions) | budesonide                 | budesonide 200micrograms/dose dry powder inhaler                                   |
| 21005        | corticosteroids (for respiratory conditions) | beclometasone dipropionate | beclometasone 250micrograms/dose inhaler cfc free                                  |
| 10090        | corticosteroids (for respiratory conditions) | beclometasone dipropionate | beclometasone 50micrograms/actuation extrafine particle cfc free inhaler           |
| 1551         | corticosteroids (for respiratory conditions) | beclometasone dipropionate | beclazone 250 inhaler (teva uk ltd)                                                |
| 39067        | corticosteroids (in chronic bowel disorders) | beclometasone dipropionate | clipper 5mg gastro-resistant modified-release tablets (chiesi ltd)                 |
| 51415        | corticosteroids (for respiratory conditions) | beclometasone dipropionate | qvar 50 inhaler (mawdsley-brooks & company ltd)                                    |
| 35106        | corticosteroids (for respiratory conditions) | beclometasone dipropionate | becodisks 100microgram with diskhaler (glaxosmithkline uk ltd)                     |
| 35299        | corticosteroids (for respiratory conditions) | beclometasone dipropionate | becodisks 400microgram (glaxosmithkline uk ltd)                                    |
| 54207        | corticosteroids (for respiratory conditions) | beclometasone dipropionate | qvar 50 inhaler (de pharmaceuticals)                                               |
| 3927         | corticosteroids (for respiratory conditions) | beclometasone dipropionate | filair 100 inhaler (meda pharmaceuticals ltd)                                      |
| 17670        | corticosteroids (for respiratory conditions) | budesonide                 | easyhaler budesonide 100micrograms/dose dry powder inhaler (orion pharma (uk) ltd) |
| 883          | corticosteroids (for respiratory conditions) | beclometasone dipropionate | becodisks 200microgram disc (allen & hanburys ltd)                                 |
| 8450         | unknown                                      |                            | flixtotide diskhaler-community pack 50 mcg                                         |
| 3289         | corticosteroids (for respiratory conditions) | fluticasone propionate     | flixtotide 25micrograms/dose inhaler (glaxosmithkline uk ltd)                      |

| Product code | BNF header                                   | Drug substance             | Drug product                                                                                              |
|--------------|----------------------------------------------|----------------------------|-----------------------------------------------------------------------------------------------------------|
| 53480        | corticosteroids (for respiratory conditions) | beclometasone dipropionate | qvar 100 autohaler (stephar (u.k.) ltd)                                                                   |
| 39102        | unknown                                      | budesonide                 | budesonide 100micrograms/dose inhaler cfc free                                                            |
| 20763        | unknown                                      |                            | becloforte                                                                                                |
| 35374        | corticosteroids (for respiratory conditions) | fluticasone propionate     | flixtide 500microgram disks (glaxosmithkline uk ltd)                                                      |
| 39200        | corticosteroids (for respiratory conditions) | beclometasone dipropionate | aerobec forte 250 autohaler (meda pharmaceuticals ltd)                                                    |
| 9599         | corticosteroids (for respiratory conditions) | beclometasone dipropionate | beclazone 50microgram/actuation inhalation powder (actavis uk ltd)                                        |
| 5804         | corticosteroids (for respiratory conditions) | beclometasone dipropionate | beclometasone 250micrograms/dose dry powder inhaler                                                       |
| 47943        | corticosteroids (for respiratory conditions) | beclometasone dipropionate | beclazone easi-breathe (roi) 100microgram/actuation pressurised inhalation (ivax pharmaceuticals ireland) |
| 5683         | corticosteroids (for respiratory conditions) | fluticasone propionate     | flixtide 250micrograms/dose evohaler (glaxosmithkline uk ltd)                                             |
| 48340        | corticosteroids (for respiratory conditions) | beclometasone dipropionate | clenil modulite 100micrograms/dose inhaler (mawdsley-brooks & company ltd)                                |
| 1885         | corticosteroids (for respiratory conditions) | beclometasone dipropionate | beclazone 200 inhaler (teva uk ltd)                                                                       |
| 911          | corticosteroids (for respiratory conditions) | fluticasone propionate     | flixtide accuhaler 250 250microgram/inhalation inhalation powder (allen & hanburys ltd)                   |
| 6095         | corticosteroids (in chronic bowel disorders) | budesonide                 | budesonide 3mg gastro-resistant capsules                                                                  |
| 28073        | corticosteroids (for respiratory conditions) | beclometasone dipropionate | beclometasone 250microgram/actuation pressurised inhalation (approved prescription services ltd)          |
| 4131         | corticosteroids (for respiratory conditions) | fluticasone propionate     | fluticasone 100microgram disc                                                                             |
| 43074        | corticosteroids (for respiratory conditions) | fluticasone propionate     | flixtide 500micrograms/dose accuhaler (glaxosmithkline uk ltd)                                            |
| 35905        | corticosteroids (for respiratory conditions) | fluticasone propionate     | fluticasone propionate 250microgram inhalation powder blisters                                            |
| 27583        | unknown                                      |                            | pulmicort                                                                                                 |
| 17654        | corticosteroids (for respiratory conditions) | beclometasone dipropionate | easyhaler beclometasone 200micrograms/dose dry powder inhaler (orion pharma (uk) ltd)                     |
| 4545         | corticosteroids (for respiratory conditions) | budesonide                 | pulmicort ls 50microgram refill canister (astrazeneca uk ltd)                                             |
| 1412         | corticosteroids (for respiratory conditions) | fluticasone propionate     | flixtide 250microgram/actuation inhalation powder (allen & hanburys ltd)                                  |

| Product code | BNF header                                   | Drug substance             | Drug product                                                                            |
|--------------|----------------------------------------------|----------------------------|-----------------------------------------------------------------------------------------|
| 3363         | corticosteroids (for respiratory conditions) | beclometasone dipropionate | becloforte 400microgram disks with diskhaler (glaxosmithkline uk ltd)                   |
| 36462        | corticosteroids (for respiratory conditions) | fluticasone propionate     | fluticasone propionate 500microgram inhalation powder blisters                          |
| 56471        | corticosteroids (for respiratory conditions) | beclometasone dipropionate | becodisks 200microgram (mawdsley-brooks & company ltd)                                  |
| 14294        | corticosteroids (for respiratory conditions) | beclometasone dipropionate | qvar 50micrograms/dose easi-breathe inhaler (teva uk ltd)                               |
| 3570         | corticosteroids (for respiratory conditions) | budesonide                 | budesonide 200micrograms/actuation refill canister                                      |
| 9164         | corticosteroids (for respiratory conditions) | fluticasone propionate     | fluticasone propionate 50micrograms/dose dry powder inhaler                             |
| 27188        | corticosteroids (for respiratory conditions) | budesonide                 | easyhaler budesonide 200micrograms/dose dry powder inhaler (orion pharma (uk) ltd)      |
| 39099        | unknown                                      | budesonide                 | pulmicort 100micrograms/dose inhaler cfc free (astrazeneca uk ltd)                      |
| 4926         | corticosteroids (for respiratory conditions) | fluticasone propionate     | flixtide accuhaler 100 100microgram/inhalation inhalation powder (allen & hanburys ltd) |
| 1642         | corticosteroids (for respiratory conditions) | budesonide                 | budesonide 400micrograms/dose dry powder inhaler                                        |
| 34859        | corticosteroids (for respiratory conditions) | beclometasone dipropionate | beclometasone 250microgram/actuation inhalation powder (neo laboratories ltd)           |
| 16054        | corticosteroids (for respiratory conditions) | budesonide                 | budesonide 200micrograms/actuation breath actuated powder inhaler                       |
| 960          | corticosteroids (for respiratory conditions) | budesonide                 | pulmicort 100 turbohaler (astrazeneca uk ltd)                                           |
| 51480        | corticosteroids (for respiratory conditions) | beclometasone dipropionate | qvar 100 autohaler (de pharmaceuticals)                                                 |
| 7891         | corticosteroids (for respiratory conditions) | fluticasone propionate     | fluticasone 500microgram disc                                                           |
| 56462        | corticosteroids (for respiratory conditions) | beclometasone dipropionate | becodisks 400microgram (waymade healthcare plc)                                         |
| 7638         | corticosteroids (for respiratory conditions) | fluticasone propionate     | fluticasone 250microgram disc                                                           |
| 15706        | corticosteroids (for respiratory conditions) | beclometasone dipropionate | beclometasone 100 micrograms/actuation vortex inhaler                                   |
| 27915        | unknown                                      |                            | fluticasone prop disk refill                                                            |
| 2893         | corticosteroids (for respiratory conditions) | beclometasone dipropionate | beclometasone 200micrograms disc                                                        |
| 5885         | corticosteroids (for respiratory conditions) | fluticasone propionate     | fluticasone propionate 100micrograms/dose dry powder inhaler                            |

| Product code | BNF header                                   | Drug substance             | Drug product                                                                                 |
|--------------|----------------------------------------------|----------------------------|----------------------------------------------------------------------------------------------|
| 3898         | corticosteroids (in chronic bowel disorders) | budesonide                 | budesonide 3mg gastro-resistant modified-release capsules                                    |
| 3546         | corticosteroids (for respiratory conditions) | beclometasone dipropionate | qvar 50 inhaler (teva uk ltd)                                                                |
| 30210        | corticosteroids (for respiratory conditions) | beclometasone dipropionate | beclometasone 250micrograms/dose inhaler (teva uk ltd)                                       |
| 1552         | corticosteroids (for respiratory conditions) | beclometasone dipropionate | becloforte easi-breathe 250microgram/actuation pressurised inhalation (allen & hanburys ltd) |
| 5822         | corticosteroids (for respiratory conditions) | fluticasone propionate     | fluticasone 250micrograms/dose inhaler cfc free                                              |
| 35430        | corticosteroids (for respiratory conditions) | beclometasone dipropionate | becodisks 200microgram with diskhaler (glaxosmithkline uk ltd)                               |
| 42994        | corticosteroids (for respiratory conditions) | fluticasone propionate     | flixotide 250micrograms/dose accuhaler (glaxosmithkline uk ltd)                              |
| 36290        | corticosteroids (for respiratory conditions) | fluticasone propionate     | flixotide 50microgram disks with diskhaler (glaxosmithkline uk ltd)                          |
| 24898        | corticosteroids (for respiratory conditions) | beclometasone dipropionate | spacehaler bdp 100microgram/actuation spacehaler (celltech pharma europe ltd)                |
| 35700        | corticosteroids (for respiratory conditions) | fluticasone propionate     | fluticasone propionate 500microgram inhalation powder blisters with device                   |
| 3188         | unknown                                      |                            | pulmicort complete 50 mcg inh                                                                |
| 7788         | corticosteroids (for respiratory conditions) | budesonide                 | budesonide 100micrograms/dose dry powder inhaler                                             |
| 35293        | corticosteroids (for respiratory conditions) | beclometasone dipropionate | beclometasone 200microgram inhalation powder blisters with device                            |
| 8251         | unknown                                      |                            | pulmicort refill 50 mg inh                                                                   |
| 1259         | corticosteroids (for respiratory conditions) | beclometasone dipropionate | beclometasone 200micrograms/dose inhaler                                                     |
| 16525        | corticosteroids (in chronic bowel disorders) | budesonide                 | budenofalk 3mg gastro-resistant capsules (dr. falk pharma uk ltd)                            |
| 1680         | corticosteroids (for respiratory conditions) | budesonide                 | pulmicort ls 50micrograms/dose inhaler (astrazeneca uk ltd)                                  |
| 10254        | corticosteroids (for respiratory conditions) | mometasone furoate         | mometasone 400micrograms/dose dry powder inhaler                                             |
| 20812        | unknown                                      |                            | pulmicort refill                                                                             |
| 14524        | corticosteroids (for respiratory conditions) | beclometasone dipropionate | bdp 250microgram/actuation spacehaler (celltech pharma europe ltd)                           |
| 2992         | corticosteroids (for respiratory conditions) | beclometasone dipropionate | beclazone 50 inhaler (teva uk ltd)                                                           |
| 7602         | corticosteroids (for respiratory conditions) | fluticasone propionate     | fluticasone 50microgram disc                                                                 |

| Product code | BNF header                                   | Drug substance             | Drug product                                                                                  |
|--------------|----------------------------------------------|----------------------------|-----------------------------------------------------------------------------------------------|
| 16305        | corticosteroids (for respiratory conditions) | fluticasone propionate     | flixtide 2mg/2ml nebules (glaxosmithkline uk ltd)                                             |
| 14757        | corticosteroids (for respiratory conditions) | beclometasone dipropionate | pulvinal beclometasone dipropionate 100micrograms/dose dry powder inhaler (chiesi ltd)        |
| 909          | unknown                                      | budesonide                 | budesonide 200micrograms/dose inhaler                                                         |
| 1959         | corticosteroids (for respiratory conditions) | budesonide                 | pulmicort 0.5mg respules (astrazeneca uk ltd)                                                 |
| 1861         | corticosteroids (for respiratory conditions) | beclometasone dipropionate | aerobec 100 autohaler (meda pharmaceuticals ltd)                                              |
| 16018        | corticosteroids (for respiratory conditions) | mometasone furoate         | mometasone 200micrograms/dose dry powder inhaler                                              |
| 35631        | corticosteroids (for respiratory conditions) | budesonide                 | budelin novolizer 200micrograms/dose inhalation powder (meda pharmaceuticals ltd)             |
| 60937        | corticosteroids (for respiratory conditions) | budesonide                 | pulmicort 200 turbohaler (dowelhurst ltd)                                                     |
| 50037        | corticosteroids (for respiratory conditions) | budesonide                 | pulmicort 0.5mg respules (waymade healthcare plc)                                             |
| 19389        | corticosteroids (for respiratory conditions) | beclometasone dipropionate | asmabec 50microgram/actuation spacehaler (celltech pharma europe ltd)                         |
| 2282         | corticosteroids (for respiratory conditions) | fluticasone propionate     | fluticasone propionate 500micrograms/dose dry powder inhaler                                  |
| 18848        | corticosteroids (for respiratory conditions) | beclometasone dipropionate | qvar 100micrograms/dose easi-breathe inhaler (teva uk ltd)                                    |
| 2440         | corticosteroids (for respiratory conditions) | fluticasone propionate     | flixtide accuhaler 500 500microgram/inhalation inhalation powder (allen & hanburys ltd)       |
| 23741        | corticosteroids (for respiratory conditions) | budesonide                 | novolizer budesonide 200microgram/actuation pressurised inhalation (meda pharmaceuticals ltd) |
| 3988         | unknown                                      |                            | flixtide diskhaler-community pack 100 mcg                                                     |
| 35724        | corticosteroids (for respiratory conditions) | budesonide                 | budelin novolizer 200micrograms/dose inhalation powder refill (meda pharmaceuticals ltd)      |
| 1380         | corticosteroids (in chronic bowel disorders) | budesonide                 | entocort cr 3mg capsules (astrazeneca uk ltd)                                                 |
| 56144        | corticosteroids (in chronic bowel disorders) | budesonide                 | budenofalk 9mg gastro-resistant granules sachets (dr. falk pharma uk ltd)                     |
| 56475        | corticosteroids (for respiratory conditions) | fluticasone propionate     | flixtide 50micrograms/dose accuhaler (sigma pharmaceuticals plc)                              |
| 40057        | corticosteroids (for respiratory conditions) | budesonide                 | pulmicort 200micrograms/dose inhaler cfc free (astrazeneca uk ltd)                            |
| 1236         | corticosteroids (for respiratory conditions) | beclometasone dipropionate | becloforte 250micrograms/dose inhaler (glaxosmithkline uk ltd)                                |

| Product code | BNF header                                   | Drug substance             | Drug product                                                              |
|--------------|----------------------------------------------|----------------------------|---------------------------------------------------------------------------|
| 11497        | corticosteroids (for respiratory conditions) | beclometasone dipropionate | beclometasone 400micrograms/dose dry powder inhaler                       |
| 35408        | corticosteroids (for respiratory conditions) | beclometasone dipropionate | becodisks 100microgram (glaxosmithkline uk ltd)                           |
| 34315        | corticosteroids (for respiratory conditions) | beclometasone dipropionate | beclometasone 250microgram/actuation inhalation powder (actavis uk ltd)   |
| 956          | corticosteroids (for respiratory conditions) | budesonide                 | pulmicort 200 turbohaler (astrazeneca uk ltd)                             |
| 18394        | corticosteroids (for respiratory conditions) | beclometasone dipropionate | bdp 50microgram/actuation spacehaler (celltech pharma europe ltd)         |
| 14321        | corticosteroids (for respiratory conditions) | beclometasone dipropionate | beclometasone 200micrograms/dose inhaler cfc free                         |
| 11732        | corticosteroids (for respiratory conditions) | beclometasone dipropionate | beclometasone 50micrograms/dose breath actuated inhaler cfc free          |
| 3993         | corticosteroids (for respiratory conditions) | beclometasone dipropionate | filair forte 250micrograms/dose inhaler (meda pharmaceuticals ltd)        |
| 35225        | corticosteroids (for respiratory conditions) | fluticasone propionate     | flixtotide 100microgram disks with diskhaler (glaxosmithkline uk ltd)     |
| 5521         | corticosteroids (for respiratory conditions) | beclometasone dipropionate | beclometasone 200micrograms/dose dry powder inhaler                       |
| 4601         | corticosteroids (for respiratory conditions) | beclometasone dipropionate | asmabec 100 clickhaler (focus pharmaceuticals ltd)                        |
| 16148        | corticosteroids (for respiratory conditions) | beclometasone dipropionate | clenil modulite 250micrograms/dose inhaler (chiesi ltd)                   |
| 2892         | corticosteroids (for respiratory conditions) | beclometasone dipropionate | becloforte 400microgram disks (glaxosmithkline uk ltd)                    |
| 35071        | corticosteroids (for respiratory conditions) | beclometasone dipropionate | becodisks 200microgram (glaxosmithkline uk ltd)                           |
| 35510        | corticosteroids (for respiratory conditions) | budesonide                 | budesonide 200micrograms/dose dry powder inhalation cartridge with device |
| 14567        | corticosteroids (for respiratory conditions) | beclometasone dipropionate | asmabec 250 clickhaler (focus pharmaceuticals ltd)                        |
| 56498        | corticosteroids (for respiratory conditions) | budesonide                 | pulmicort 200 turbohaler (waymade healthcare plc)                         |
| 24660        | unknown                                      |                            | betamethasone valerate                                                    |
| 51997        | corticosteroids (in chronic bowel disorders) | budesonide                 | budesonide 9mg gastro-resistant granules sachets                          |
| 1734         | corticosteroids (for respiratory conditions) | beclometasone dipropionate | beclometasone 100micrograms/dose breath actuated inhaler                  |
| 36090        | corticosteroids (for respiratory conditions) | fluticasone propionate     | flixtotide 100microgram disks (glaxosmithkline uk ltd)                    |
| 5975         | corticosteroids (for respiratory conditions) | fluticasone propionate     | fluticasone 125micrograms/dose inhaler cfc free                           |
| 19401        | corticosteroids (for respiratory conditions) | beclometasone dipropionate | beclometasone 250micrograms/actuation inhaler and compact spacer          |

| Product code | BNF header                                   | Drug substance             | Drug product                                                                                    |
|--------------|----------------------------------------------|----------------------------|-------------------------------------------------------------------------------------------------|
| 895          | corticosteroids (for respiratory conditions) | beclometasone dipropionate | beclazone 100 easi-breathe inhaler (teva uk ltd)                                                |
| 51815        | corticosteroids (for respiratory conditions) | fluticasone propionate     | flixtotide 250micrograms/dose evohaler (waymade healthcare plc)                                 |
| 36021        | corticosteroids (for respiratory conditions) | fluticasone propionate     | fluticasone propionate 50microgram inhalation powder blisters with device                       |
| 11198        | corticosteroids (for respiratory conditions) | beclometasone dipropionate | beclometasone 50 micrograms/actuation vortex inhaler                                            |
| 50287        | corticosteroids (for respiratory conditions) | beclometasone dipropionate | qvar 100 inhaler (de pharmaceuticals)                                                           |
| 34428        | corticosteroids (for respiratory conditions) | beclometasone dipropionate | beclometasone 50microgram/actuation inhalation powder (neo laboratories ltd)                    |
| 26063        | corticosteroids (for respiratory conditions) | beclometasone dipropionate | beclometasone 100micrograms/dose inhaler (teva uk ltd)                                          |
| 35602        | corticosteroids (for respiratory conditions) | budesonide                 | budesonide 200micrograms/dose dry powder inhalation cartridge                                   |
| 30238        | corticosteroids (for respiratory conditions) | beclometasone dipropionate | beclometasone 50microgram/actuation pressurised inhalation (approved prescription services ltd) |
| 14700        | corticosteroids (for respiratory conditions) | budesonide                 | budesonide 400micrograms/actuation inhaler                                                      |
| 38           | corticosteroids (for respiratory conditions) | beclometasone dipropionate | beclometasone 100micrograms/dose inhaler                                                        |
| 13815        | corticosteroids (for respiratory conditions) | beclometasone dipropionate | beclazone 100microgram/actuation inhalation powder (actavis uk ltd)                             |
| 947          | corticosteroids (for respiratory conditions) | budesonide                 | budesonide 50micrograms/actuation refill canister                                               |
| 10321        | unknown                                      | budesonide                 | budesonide 400microgram inhalation powder capsules                                              |
| 1426         | corticosteroids (for respiratory conditions) | fluticasone propionate     | flixtotide 500microgram disc (allen & hanburys ltd)                                             |
| 3150         | corticosteroids (for respiratory conditions) | beclometasone dipropionate | beclometasone 100micrograms/actuation extrafine particle cfc free inhaler                       |
| 35113        | corticosteroids (for respiratory conditions) | beclometasone dipropionate | beclometasone 200microgram inhalation powder blisters                                           |
| 1424         | corticosteroids (for respiratory conditions) | fluticasone propionate     | flixtotide 250microgram disc (allen & hanburys ltd)                                             |
| 4803         | corticosteroids (for respiratory conditions) | beclometasone dipropionate | beclazone 250microgram/actuation inhalation powder (actavis uk ltd)                             |
| 56493        | corticosteroids (for respiratory conditions) | beclometasone dipropionate | qvar 50micrograms/dose easi-breathe inhaler (sigma pharmaceuticals plc)                         |
| 61664        | corticosteroids (for respiratory conditions) | beclometasone dipropionate | clenil modulite 250micrograms/dose inhaler (waymade healthcare plc)                             |



| Product code | BNF header                                   | Drug substance             | Drug product                                                                                   |
|--------------|----------------------------------------------|----------------------------|------------------------------------------------------------------------------------------------|
| 35772        | corticosteroids (for respiratory conditions) | fluticasone propionate     | fluticasone propionate 100microgram inhalation powder blisters                                 |
| 3119         | corticosteroids (for respiratory conditions) | beclometasone dipropionate | becloforte integra 250microgram/actuation inhaler with compact spacer (glaxo laboratories ltd) |
| 5522         | corticosteroids (for respiratory conditions) | beclometasone dipropionate | beclometasone 100micrograms/dose dry powder inhaler                                            |
| 25204        | corticosteroids (for respiratory conditions) | beclometasone dipropionate | beclometasone 100micrograms/dose inhaler (a a h pharmaceuticals ltd)                           |
| 7724         | corticosteroids (for respiratory conditions) | betamethasone valerate     | betamethasone valerate 100micrograms/actuation inhaler                                         |
| 3743         | corticosteroids (for respiratory conditions) | beclometasone dipropionate | filair 50 inhaler (meda pharmaceuticals ltd)                                                   |
| 1956         | corticosteroids (for respiratory conditions) | budesonide                 | pulmicort 1mg respules (astrazeneca uk ltd)                                                    |
| 56499        | corticosteroids (for respiratory conditions) | fluticasone propionate     | flixtide 500micrograms/dose accuhaler (waymade healthcare plc)                                 |
| 2125         | corticosteroids (for respiratory conditions) | budesonide                 | pulmicort 200microgram refill canister (astrazeneca uk ltd)                                    |
| 36401        | corticosteroids (for respiratory conditions) | fluticasone propionate     | fluticasone propionate 250microgram inhalation powder blisters with device                     |
| 4688         | corticosteroids (for respiratory conditions) | fluticasone propionate     | fluticasone 50microgram/actuation pressurised inhalation                                       |
| 3065         | corticosteroids (for respiratory conditions) | betamethasone valerate     | bexasol inhalation powder (allen & hanburys ltd)                                               |
| 35118        | corticosteroids (for respiratory conditions) | beclometasone dipropionate | becodisks 400microgram with diskhaler (glaxosmithkline uk ltd)                                 |
| 1518         | corticosteroids (for respiratory conditions) | fluticasone propionate     | flixtide 50microgram/actuation inhalation powder (allen & hanburys ltd)                        |
| 5309         | corticosteroids (for respiratory conditions) | fluticasone propionate     | flixtide 50micrograms/dose evohaler (glaxosmithkline uk ltd)                                   |
| 47225        | unknown                                      | budesonide                 | budesonide 9mg gastro-resistant granules sachets                                               |
| 30649        | corticosteroids (for respiratory conditions) | budesonide                 | easyhaler budesonide 400micrograms/dose dry powder inhaler (orion pharma (uk) ltd)             |
| 35580        | corticosteroids (for respiratory conditions) | beclometasone dipropionate | beclometasone 100microgram inhalation powder blisters with device                              |
| 41412        | corticosteroids (for respiratory conditions) | beclometasone dipropionate | beclometasone 400micrograms/actuation inhaler                                                  |
| 20825        | corticosteroids (for respiratory conditions) | beclometasone dipropionate | spacehaler bdp 250microgram/actuation spacehaler (celltech pharma europe ltd)                  |

| Product code | BNF header                                   | Drug substance             | Drug product                                                                                     |
|--------------|----------------------------------------------|----------------------------|--------------------------------------------------------------------------------------------------|
| 35461        | corticosteroids (for respiratory conditions) | fluticasone propionate     | flixtotide 250microgram disks with diskhaler (glaxosmithkline uk ltd)                            |
| 42985        | corticosteroids (for respiratory conditions) | fluticasone propionate     | flixtotide 50micrograms/dose accuhaler (glaxosmithkline uk ltd)                                  |
| 9921         | corticosteroids (for respiratory conditions) | beclometasone dipropionate | beclometasone 100micrograms/dose breath actuated inhaler cfc free                                |
| 56474        | corticosteroids (for respiratory conditions) | fluticasone propionate     | flixtotide 125micrograms/dose evohaler (de pharmaceuticals)                                      |
| 35986        | corticosteroids (for respiratory conditions) | fluticasone propionate     | flixtotide 50microgram disks (glaxosmithkline uk ltd)                                            |
| 11149        | glucocorticoid therapy                       | betamethasone              | betnelan 500microgram tablets (focus pharmaceuticals ltd)                                        |
| 1243         | corticosteroids (for respiratory conditions) | beclometasone dipropionate | beclazone 250 easi-breathe inhaler (teva uk ltd)                                                 |
| 31774        | corticosteroids (for respiratory conditions) | beclometasone dipropionate | beclometasone 50micrograms/dose inhaler (generics (uk) ltd)                                      |
| 56477        | corticosteroids (for respiratory conditions) | fluticasone propionate     | flixtotide 100micrograms/dose accuhaler (waymade healthcare plc)                                 |
| 2600         | corticosteroids (for respiratory conditions) | beclometasone dipropionate | beclometasone 250micrograms/dose breath actuated inhaler                                         |
| 16151        | corticosteroids (for respiratory conditions) | beclometasone dipropionate | clenil modulite 200micrograms/dose inhaler (chiesi ltd)                                          |
| 1100         | corticosteroids (for respiratory conditions) | beclometasone dipropionate | beclazone 100 inhaler (teva uk ltd)                                                              |
| 1951         | corticosteroids (for respiratory conditions) | beclometasone dipropionate | becodisks 400microgram disc (allen & hanburys ltd)                                               |
| 7948         | corticosteroids (for respiratory conditions) | fluticasone propionate     | fluticasone propionate 250micrograms/dose dry powder inhaler                                     |
| 21482        | corticosteroids (for respiratory conditions) | beclometasone dipropionate | beclometasone 100micrograms/dose inhaler (generics (uk) ltd)                                     |
| 9477         | corticosteroids (for respiratory conditions) | beclometasone dipropionate | asmabec 100microgram/actuation spacehaler (celltech pharma europe ltd)                           |
| 27679        | corticosteroids (for respiratory conditions) | beclometasone dipropionate | beclometasone 100microgram/actuation pressurised inhalation (approved prescription services ltd) |
| 35652        | corticosteroids (for respiratory conditions) | beclometasone dipropionate | beclometasone 100microgram inhalation powder blisters                                            |
| 46157        | corticosteroids (for respiratory conditions) | beclometasone dipropionate | beclometasone 200 cyclocaps (teva uk ltd)                                                        |
| 56484        | corticosteroids (for respiratory conditions) | fluticasone propionate     | flixtotide 250micrograms/dose accuhaler (waymade healthcare plc)                                 |
| 3442         | unknown                                      |                            | pulmicort complete 200 mcg inh                                                                   |

| Product code | BNF header                                   | Drug substance             | Drug product                                                                 |
|--------------|----------------------------------------------|----------------------------|------------------------------------------------------------------------------|
| 28761        | corticosteroids (for respiratory conditions) | beclometasone dipropionate | spacehaler bdp 50microgram/actuation spacehaler (celltech pharma europe ltd) |
| 5992         | corticosteroids (for respiratory conditions) | beclometasone dipropionate | beclometasone 50micrograms/dose dry powder inhaler                           |
| 454          | corticosteroids (for respiratory conditions) | budesonide                 | pulmicort 200microgram inhaler (astrazeneca uk ltd)                          |
| 3220         | corticosteroids (for respiratory conditions) | beclometasone dipropionate | qvar 50 autohaler (teva uk ltd)                                              |
| 18537        | unknown                                      | budesonide                 | budesonide 200microgram inhalation powder capsules                           |
| 57555        | corticosteroids (for respiratory conditions) | fluticasone propionate     | flixtotide 125micrograms/dose evohaler (dowelhurst ltd)                      |
| 48709        | corticosteroids (for respiratory conditions) | beclometasone dipropionate | qvar 100micrograms/dose easi-breathe inhaler (sigma pharmaceuticals plc)     |
| 16584        | corticosteroids (for respiratory conditions) | beclometasone dipropionate | beclometasone 50micrograms/dose inhaler cfc free                             |
| 35392        | corticosteroids (for respiratory conditions) | fluticasone propionate     | flixtotide 500microgram disks with diskhaler (glaxosmithkline uk ltd)        |

## FP\_SAL codes

| Product code | BNF header                                                             | Drug substance                              | Drug product                                                                                |
|--------------|------------------------------------------------------------------------|---------------------------------------------|---------------------------------------------------------------------------------------------|
| 638          | Selective Beta 2 Agonists/Corticosteroids (for Respiratory Conditions) | Fluticasone propionate/Salmeterol xinafoate | Seretide 250 Accuhaler (GlaxoSmithKline UK Ltd)                                             |
| 665          | Selective Beta 2 Agonists/Corticosteroids (for Respiratory Conditions) | Salmeterol xinafoate/Fluticasone propionate | Seretide 100 Accuhaler (GlaxoSmithKline UK Ltd)                                             |
| 3666         | Selective Beta 2 Agonists/Corticosteroids (for Respiratory Conditions) | Salmeterol xinafoate/Fluticasone propionate | Seretide 500 Accuhaler (GlaxoSmithKline UK Ltd)                                             |
| 5143         | Selective Beta 2 Agonists/Corticosteroids (for Respiratory Conditions) | Fluticasone propionate/Salmeterol xinafoate | Seretide 50 Evohaler (GlaxoSmithKline UK Ltd)                                               |
| 5161         | Selective Beta 2 Agonists/Corticosteroids (for Respiratory Conditions) | Fluticasone propionate/Salmeterol xinafoate | Seretide 125 Evohaler (GlaxoSmithKline UK Ltd)                                              |
| 5172         | Selective Beta 2 Agonists/Corticosteroids (for Respiratory Conditions) | Fluticasone propionate/Salmeterol xinafoate | Seretide 250 Evohaler (GlaxoSmithKline UK Ltd)                                              |
| 5558         | Selective Beta 2 Agonists/Corticosteroids (for Respiratory Conditions) | Salmeterol Xinafoate/Fluticasone Propionate | Salmeterol 50micrograms with fluticasone 500micrograms CFC free inhaler                     |
| 5864         | Selective Beta 2 Agonists/Corticosteroids (for Respiratory Conditions) | Salmeterol Xinafoate/Fluticasone Propionate | Salmeterol 25micrograms with fluticasone 250micrograms CFC free inhaler                     |
| 5942         | Selective Beta 2 Agonists/Corticosteroids (for Respiratory Conditions) | Salmeterol Xinafoate/Fluticasone Propionate | Salmeterol 50micrograms with fluticasone 250micrograms CFC free inhaler                     |
| 6569         | Selective Beta 2 Agonists/Corticosteroids (for Respiratory Conditions) | Salmeterol Xinafoate/Fluticasone Propionate | Salmeterol 25micrograms with fluticasone 125micrograms CFC free inhaler                     |
| 6616         | Selective Beta 2 Agonists/Corticosteroids (for Respiratory Conditions) | Salmeterol Xinafoate/Fluticasone Propionate | Salmeterol 25micrograms with fluticasone 50micrograms CFC free inhaler                      |
| 6938         | Selective Beta 2 Agonists/Corticosteroids (for Respiratory Conditions) | Salmeterol Xinafoate/Fluticasone Propionate | Salmeterol 50micrograms with fluticasone 100micrograms dry powder inhaler                   |
| 11410        | Selective Beta 2 Agonists/Corticosteroids (for Respiratory Conditions) | Salmeterol xinafoate/Fluticasone propionate | Fluticasone propionate 500micrograms/dose / Salmeterol 50micrograms/dose dry powder inhaler |
| 11588        | Selective Beta 2 Agonists/Corticosteroids (for Respiratory Conditions) | Fluticasone propionate/Salmeterol xinafoate | Fluticasone 125micrograms/dose / Salmeterol 25micrograms/dose inhaler CFC free              |
| 11618        | Selective Beta 2 Agonists/Corticosteroids (for Respiratory Conditions) | Fluticasone propionate/Salmeterol xinafoate | Fluticasone 250micrograms/dose / Salmeterol 25micrograms/dose inhaler CFC free              |
| 12994        | Selective Beta 2 Agonists/Corticosteroids (for Respiratory Conditions) | Fluticasone propionate/Salmeterol xinafoate | Fluticasone 50micrograms/dose / Salmeterol 25micrograms/dose inhaler CFC free               |

| Product code | BNF header                                                             | Drug substance                                       | Drug product                                                                                |
|--------------|------------------------------------------------------------------------|------------------------------------------------------|---------------------------------------------------------------------------------------------|
| 13040        | Selective Beta 2 Agonists/Corticosteroids (for Respiratory Conditions) | Fluticasone propionate/Salmeterol xinafoate          | Fluticasone propionate 250micrograms/dose / Salmeterol 50micrograms/dose dry powder inhaler |
| 13273        | Selective Beta 2 Agonists/Corticosteroids (for Respiratory Conditions) | Salmeterol xinafoate/Fluticasone propionate          | Fluticasone propionate 100micrograms/dose / Salmeterol 50micrograms/dose dry powder inhaler |
| 48739        | Selective Beta 2 Agonists/Corticosteroids (for Respiratory Conditions) | Fluticasone propionate/Salmeterol xinafoate          | Seretide 250 Evohaler (DE Pharmaceuticals)                                                  |
| 49000        | Selective Beta 2 Agonists/Corticosteroids (for Respiratory Conditions) | Fluticasone propionate/Salmeterol xinafoate          | Seretide 250 Evohaler (Waymade Healthcare Plc)                                              |
| 50560        | Selective Beta 2 Agonists/Corticosteroids (for Respiratory Conditions) | Fluticasone propionate/Salmeterol xinafoate          | Seretide 250 Accuhaler (Sigma Pharmaceuticals Plc)                                          |
| 50689        | Selective Beta 2 Agonists/Corticosteroids (for Respiratory Conditions) | Fluticasone propionate/Formoterol fumarate dihydrate | Flutiform 50micrograms/dose / 5micrograms/dose inhaler (Napp Pharmaceuticals Ltd)           |
| 50886        | Selective Beta 2 Agonists/Corticosteroids (for Respiratory Conditions) | Fluticasone propionate/Salmeterol xinafoate          | Seretide 250 Evohaler (Stephar (U.K.) Ltd)                                                  |
| 51027        | Selective Beta 2 Agonists/Corticosteroids (for Respiratory Conditions) | Fluticasone propionate/Salmeterol xinafoate          | Seretide 125 Evohaler (DE Pharmaceuticals)                                                  |
| 51151        | Selective Beta 2 Agonists/Corticosteroids (for Respiratory Conditions) | Fluticasone propionate/Salmeterol xinafoate          | Seretide 125 Evohaler (Lexon (UK) Ltd)                                                      |
| 51270        | Selective Beta 2 Agonists/Corticosteroids (for Respiratory Conditions) | Fluticasone propionate/Formoterol fumarate dihydrate | Fluticasone 50micrograms/dose / Formoterol 5micrograms/dose inhaler CFC free                |
| 51394        | Selective Beta 2 Agonists/Corticosteroids (for Respiratory Conditions) | Salmeterol xinafoate/Fluticasone propionate          | Seretide 500 Accuhaler (Waymade Healthcare Plc)                                             |
| 51593        | Selective Beta 2 Agonists/Corticosteroids (for Respiratory Conditions) | Salmeterol xinafoate/Fluticasone propionate          | Seretide 500 Accuhaler (DE Pharmaceuticals)                                                 |
| 51861        | Selective Beta 2 Agonists/Corticosteroids (for Respiratory Conditions) | Salmeterol xinafoate/Fluticasone propionate          | Seretide 500 Accuhaler (Mawdsley-Brooks & Company Ltd)                                      |
| 51909        | Selective Beta 2 Agonists/Corticosteroids (for Respiratory Conditions) | Fluticasone propionate/Salmeterol xinafoate          | Seretide 250 Evohaler (Necessity Supplies Ltd)                                              |
| 53230        | Selective Beta 2 Agonists/Corticosteroids (for Respiratory Conditions) | Fluticasone propionate/Salmeterol xinafoate          | Seretide 250 Accuhaler (DE Pharmaceuticals)                                                 |
| 53283        | Selective Beta 2 Agonists/Corticosteroids (for Respiratory Conditions) | Salmeterol xinafoate/Fluticasone propionate          | Seretide 100 Accuhaler (Waymade Healthcare Plc)                                             |
| 55411        | Corticosteroids Used In Nasal Allergy/Antihistamines In Nasal Allergy  | Fluticasone propionate/Azelastine hydrochloride      | Fluticasone propionate 50micrograms/dose / Azelastine 137micrograms/dose nasal spray        |
| 55435        | Corticosteroids Used In Nasal Allergy/Antihistamines In Nasal Allergy  | Fluticasone propionate/Azelastine hydrochloride      | Dymista 137micrograms/dose / 50micrograms/dose nasal spray (Meda Pharmaceuticals Ltd)       |

| Product code | BNF header                                                             | Drug substance                              | Drug product                                                        |
|--------------|------------------------------------------------------------------------|---------------------------------------------|---------------------------------------------------------------------|
| 55677        | Selective Beta 2 Agonists/Corticosteroids (for Respiratory Conditions) | Salmeterol xinafoate/Fluticasone propionate | Seretide 500 Accuhaler (Lexon (UK) Ltd)                             |
| 61280        | Selective Beta 2 Agonists/Corticosteroids (for Respiratory Conditions) | Fluticasone propionate/Salmeterol xinafoate | Seretide 250 Accuhaler (Waymade Healthcare Plc)                     |
| 62126        | Selective Beta 2 Agonists/Corticosteroids (for Respiratory Conditions) | Salmeterol xinafoate/Fluticasone propionate | Seretide 100 Accuhaler (DE Pharmaceuticals)                         |
| 63252        | Selective Beta 2 Agonists/Corticosteroids (for Respiratory Conditions) | Fluticasone propionate/Salmeterol xinafoate | Seretide 250 Evohaler (Lexon (UK) Ltd)                              |
| 63945        | Selective Beta 2 Agonists/Corticosteroids (for Respiratory Conditions) | Fluticasone propionate/Salmeterol xinafoate | Seretide 250 Accuhaler (Lexon (UK) Ltd)                             |
| 64372        | Selective Beta 2 Agonists/Corticosteroids (for Respiratory Conditions) | Fluticasone propionate/Salmeterol xinafoate | Sirdupla 25micrograms/dose / 125micrograms/dose inhaler (Mylan Ltd) |
| 64373        | Selective Beta 2 Agonists/Corticosteroids (for Respiratory Conditions) | Fluticasone propionate/Salmeterol xinafoate | Sirdupla 25micrograms/dose / 250micrograms/dose inhaler (Mylan Ltd) |
| 65117        | Selective Beta 2 Agonists/Corticosteroids (for Respiratory Conditions) | Fluticasone propionate/Salmeterol xinafoate | Seretide 125 Evohaler (Mawdsley-Brooks & Company Ltd)               |

**STROBE 2007 (v4) Statement—Checklist of items that should be included in reports of *cohort studies***

| Section/Topic                | Item # | Recommendation                                                                                                                                                                       | Reported on page #                                                                                                             |
|------------------------------|--------|--------------------------------------------------------------------------------------------------------------------------------------------------------------------------------------|--------------------------------------------------------------------------------------------------------------------------------|
| Title and abstract           | 1      | (a) Indicate the study's design with a commonly used term in the title or the abstract                                                                                               | 1                                                                                                                              |
|                              |        | (b) Provide in the abstract an informative and balanced summary of what was done and what was found                                                                                  | 3 (note: is a protocol for an observational study so here and subsequently is reported <i>what is planned to be done</i> only) |
| <b>Introduction</b>          |        |                                                                                                                                                                                      |                                                                                                                                |
| Background/rationale         | 2      | Explain the scientific background and rationale for the investigation being reported                                                                                                 | 5                                                                                                                              |
| Objectives                   | 3      | State specific objectives, including any prespecified hypotheses                                                                                                                     | 6                                                                                                                              |
| <b>Methods</b>               |        |                                                                                                                                                                                      |                                                                                                                                |
| Study design                 | 4      | Present key elements of study design early in the paper                                                                                                                              | 6                                                                                                                              |
| Setting                      | 5      | Describe the setting, locations, and relevant dates, including periods of recruitment, exposure, follow-up, and data collection                                                      | 6                                                                                                                              |
| Participants                 | 6      | (a) Give the eligibility criteria, and the sources and methods of selection of participants. Describe methods of follow-up                                                           | 7 - 10                                                                                                                         |
|                              |        | (b) For matched studies, give matching criteria and number of exposed and unexposed                                                                                                  | 7 - 10                                                                                                                         |
| Variables                    | 7      | Clearly define all outcomes, exposures, predictors, potential confounders, and effect modifiers. Give diagnostic criteria, if applicable                                             | 13 - 14                                                                                                                        |
| Data sources/<br>measurement | 8*     | For each variable of interest, give sources of data and details of methods of assessment (measurement). Describe comparability of assessment methods if there is more than one group | 6                                                                                                                              |
| Bias                         | 9      | Describe any efforts to address potential sources of bias                                                                                                                            | 14 - 16                                                                                                                        |
| Study size                   | 10     | Explain how the study size was arrived at                                                                                                                                            | 14                                                                                                                             |
| Quantitative variables       | 11     | Explain how quantitative variables were handled in the analyses. If applicable, describe which groupings were chosen and why                                                         | 11                                                                                                                             |

|                     |     |                                                                                                                                                                                                              |                                                      |
|---------------------|-----|--------------------------------------------------------------------------------------------------------------------------------------------------------------------------------------------------------------|------------------------------------------------------|
| Statistical methods | 12  | (a) Describe all statistical methods, including those used to control for confounding                                                                                                                        | 14 - 16                                              |
|                     |     | (b) Describe any methods used to examine subgroups and interactions                                                                                                                                          | 14 - 16                                              |
|                     |     | (c) Explain how missing data were addressed                                                                                                                                                                  | 16                                                   |
|                     |     | (d) If applicable, explain how loss to follow-up was addressed                                                                                                                                               | NA                                                   |
|                     |     | (e) Describe any sensitivity analyses                                                                                                                                                                        | 14 - 16                                              |
| <b>Results</b>      |     |                                                                                                                                                                                                              | <b>NA (is a protocol for an observational study)</b> |
| Participants        | 13* | (a) Report numbers of individuals at each stage of study—eg numbers potentially eligible, examined for eligibility, confirmed eligible, included in the study, completing follow-up, and analysed            |                                                      |
|                     |     | (b) Give reasons for non-participation at each stage                                                                                                                                                         |                                                      |
|                     |     | (c) Consider use of a flow diagram                                                                                                                                                                           |                                                      |
| Descriptive data    | 14* | (a) Give characteristics of study participants (eg demographic, clinical, social) and information on exposures and potential confounders                                                                     |                                                      |
|                     |     | (b) Indicate number of participants with missing data for each variable of interest                                                                                                                          |                                                      |
|                     |     | (c) Summarise follow-up time (eg, average and total amount)                                                                                                                                                  |                                                      |
| Outcome data        | 15* | Report numbers of outcome events or summary measures over time                                                                                                                                               |                                                      |
| Main results        | 16  | (a) Give unadjusted estimates and, if applicable, confounder-adjusted estimates and their precision (eg, 95% confidence interval). Make clear which confounders were adjusted for and why they were included |                                                      |
|                     |     | (b) Report category boundaries when continuous variables were categorized                                                                                                                                    |                                                      |
|                     |     | (c) If relevant, consider translating estimates of relative risk into absolute risk for a meaningful time period                                                                                             |                                                      |
| Other analyses      | 17  | Report other analyses done—eg analyses of subgroups and interactions, and sensitivity analyses                                                                                                               |                                                      |
| <b>Discussion</b>   |     |                                                                                                                                                                                                              | <b>NA (is a protocol for an observational study)</b> |
| Key results         | 18  | Summarise key results with reference to study objectives                                                                                                                                                     |                                                      |
| <b>Limitations</b>  |     |                                                                                                                                                                                                              | <b>NA (is a protocol for an observational study)</b> |
| Interpretation      | 20  | Give a cautious overall interpretation of results considering objectives, limitations, multiplicity of analyses, results from similar studies, and other relevant evidence                                   |                                                      |



|                          |    |                                                                                                                                                               |   |
|--------------------------|----|---------------------------------------------------------------------------------------------------------------------------------------------------------------|---|
| Generalisability         | 21 | Discuss the generalisability (external validity) of the study results                                                                                         |   |
| <b>Other information</b> |    |                                                                                                                                                               |   |
| Funding                  | 22 | Give the source of funding and the role of the funders for the present study and, if applicable, for the original study on which the present article is based | 2 |

\*Give information separately for cases and controls in case-control studies and, if applicable, for exposed and unexposed groups in cohort and cross-sectional studies.

**Note:** An Explanation and Elaboration article discusses each checklist item and gives methodological background and published examples of transparent reporting. The STROBE checklist is best used in conjunction with this article (freely available on the Web sites of PLoS Medicine at <http://www.plosmedicine.org/>, Annals of Internal Medicine at <http://www.annals.org/>, and Epidemiology at <http://www.epidem.com/>). Information on the STROBE Initiative is available at [www.strobe-statement.org](http://www.strobe-statement.org).
