# Supplementary material for: Real-world effects of medications for chronic obstructive pulmonary disease: protocol for a UK population-based non-interventional cohort study with validation against randomised trial results
Source: PubMed Central journal article supplement (PMC5875594; doi:10.1136/bmjopen-2017-019475), 2018-03-25
Supplement: bmjopen-2017-019475supp001.pdf [file bmjopen-2017-019475supp001.pdf]

## Overview of algorithms to be used for detecting COPD, COPD exacerbations and pneumonia

| Condition         | Paper (author, year)              | Algorithm description <sup>1</sup>                                                                                                                                                                                                                                                                                                                                                                 | Validity <sup>2</sup>                            | Other notes                                                                                                                                                                                                                                                                            |
|-------------------|-----------------------------------|----------------------------------------------------------------------------------------------------------------------------------------------------------------------------------------------------------------------------------------------------------------------------------------------------------------------------------------------------------------------------------------------------|--------------------------------------------------|----------------------------------------------------------------------------------------------------------------------------------------------------------------------------------------------------------------------------------------------------------------------------------------|
| COPD              | Quint et al, 2014 <sup>10</sup>   | - CPRD <sup>3</sup> diagnostic (Read) code for COPD                                                                                                                                                                                                                                                                                                                                                | PPV <sup>4</sup> : 87% (78 – 92)                 | <ol style="list-style-type: none"> <li>1. Comparison with gold standard of respiratory physician review of information obtained by questionnaire from GPs</li> <li>2. 8 algorithms presented in total, PPVs ranging from 12 to 89</li> </ol>                                           |
| COPD exacerbation | Rothnie et al, 2016 <sup>12</sup> | <ul style="list-style-type: none"> <li>- CPRD diagnostic (Read) code for LRTI or Acute Exacerbation COPD (AECOPD) <b>OR</b></li> <li>- A prescription of a COPD-specific antibiotic combined with OCS for 5-14 days <b>OR</b></li> <li>- A record (Read code) of two or more respiratory symptoms of AECOPD with a prescription of COPD-specific antibiotics and/or OCS on the same day</li> </ul> | PPV: 86% (83 – 88)<br>Sensitivity: 63% (55 – 70) | <ol style="list-style-type: none"> <li>1. Comparison with gold standard of respiratory physician review of information obtained by questionnaire from GPs</li> <li>2. 15 algorithms presented in total, PPVs ranging from 61% – 100%, sensitivities ranging from 1.6% – 63%</li> </ol> |
| Pneumonia         | Millet et al, 2013 <sup>11</sup>  | <ul style="list-style-type: none"> <li>- CPRD diagnostic (Read) codes and HES<sup>5</sup> diagnostic (ICD-10) codes for pneumonia (identified as a subset of an initial search for LRTI codes)</li> <li>- Records in both database within the 28 days considered the same illness-episode</li> </ul>                                                                                               | No validation performed                          |                                                                                                                                                                                                                                                                                        |

**Note 1:** Main algorithm presented in article and to be applied initially in COPD medications real-world effects study (details on other algorithms presented in paper provided in the “Other notes” column where appropriate). **Note 2:** Validity=measure of validity presented in article:result obtained (95% CI). **Note 3:** CPRD=UK Clinical Practice Research Datalink **Note 4:** PPV=positive predictive value **Note 5:** HES=Hospital Episode Statistics

## LAMA codes

| Product code | BNF header                           | Drug substance                            | Drug product                                                                                           |
|--------------|--------------------------------------|-------------------------------------------|--------------------------------------------------------------------------------------------------------|
| 61176        | compound bronchodilator preparations | vilanterol trifenate/umeclidinium bromide | anoro ellipta 55micrograms/dose / 22micrograms/dose dry powder inhaler (glaxosmithkline uk ltd)        |
| 61490        | compound bronchodilator preparations |                                           | umeclidinium bromide 65micrograms/dose / vilanterol 22micrograms/dose dry powder inhaler               |
| 35014        | antimuscarinic bronchodilators       | tiotropium bromide monohydrate            | tiotropium bromide 18microgram inhalation powder capsules with device                                  |
| 6474         | antimuscarinics                      | glycopyrronium bromide                    | robinul 1mg tablet (idis world medicines)                                                              |
| 50577        | antimuscarinic bronchodilators       | tiotropium bromide                        | spiriva 18microgram inhalation powder capsules with handihaler (de pharmaceuticals)                    |
| 35011        | antimuscarinic bronchodilators       | tiotropium bromide monohydrate            | tiotropium bromide 18microgram inhalation powder capsules                                              |
| 49227        | antimuscarinic bronchodilators       |                                           | aclidinium bromide 375micrograms/dose dry powder inhaler                                               |
| 50103        | antimuscarinic bronchodilators       |                                           | spiriva 18microgram inhalation powder capsules with handihaler (waymade healthcare plc)                |
| 7908         | antimuscarinics                      | glycopyrronium bromide                    | robinul 2mg tablet (wyeth pharmaceuticals)                                                             |
| 59638        | antimuscarinic bronchodilators       |                                           | spiriva 18microgram inhalation powder capsules with handihaler (sigma pharmaceuticals plc)             |
| 51967        | antimuscarinic bronchodilators       | tiotropium bromide                        | spiriva 18microgram inhalation powder capsules (mawdsley-brooks & company ltd)                         |
| 53982        | antimuscarinic bronchodilators       |                                           | seebri breezhaler 44microgram inhalation powder capsules with device (novartis pharmaceuticals uk ltd) |
| 6050         | antimuscarinic bronchodilators       | tiotropium bromide                        | spiriva 18 microgram capsule (boehringer ingelheim ltd)                                                |
| 7597         | other ulcer healing drugs            | glycopyrronium bromide                    | glycopyrronium bromide 2mg tablets                                                                     |
| 49228        | antimuscarinic bronchodilators       |                                           | eklira 322micrograms/dose genuair (almirall ltd)                                                       |
| 59173        | other ulcer healing drugs            | glycopyrronium bromide                    | glycopyrronium bromide 200micrograms/5ml oral suspension                                               |

| Product code | BNF header                     | Drug substance         | Drug product                                                                                                 |
|--------------|--------------------------------|------------------------|--------------------------------------------------------------------------------------------------------------|
| 36864        | antimuscarinic bronchodilators | tiotropium bromide     | tiotropium bromide 2.5micrograms/dose solution for inhalation cartridge with device cfc free                 |
| 55911        | other ulcer healing drugs      | glycopyrronium bromide | glycopyrronium bromide 500micrograms/5ml oral solution                                                       |
| 34995        | antimuscarinic bronchodilators | tiotropium bromide     | spiriva 18microgram inhalation powder capsules with handihaler (boehringer ingelheim ltd)                    |
| 35000        | antimuscarinic bronchodilators | tiotropium bromide     | spiriva 18microgram inhalation powder capsules (boehringer ingelheim ltd)                                    |
| 29138        | other ulcer healing drugs      | glycopyrronium bromide | glycopyrronium bromide 1mg/5ml oral solution                                                                 |
| 47269        | other ulcer healing drugs      | glycopyrronium bromide | glycopyrronium bromide 1mg/5ml oral suspension                                                               |
| 54151        | other ulcer healing drugs      | glycopyrronium bromide | glycopyrronium bromide 600micrograms/5ml oral suspension                                                     |
| 55795        | other ulcer healing drugs      | glycopyrronium bromide | glycopyrronium bromide 500micrograms/5ml oral suspension                                                     |
| 38377        | other ulcer healing drugs      | glycopyrronium bromide | glycopyrronium bromide 2mg/5ml oral solution                                                                 |
| 7218         | other ulcer healing drugs      | glycopyrronium bromide | glycopyrronium bromide 1mg tablets                                                                           |
| 36869        | antimuscarinic bronchodilators | tiotropium bromide     | spiriva respimat 2.5micrograms/dose solution for inhalation cartridge with device (boehringer ingelheim ltd) |
| 62109        | antimuscarinic bronchodilators |                        | umeclidinium bromide 65micrograms/dose dry powder inhaler                                                    |
| 50292        | antimuscarinic bronchodilators |                        | spiriva 18microgram inhalation powder capsules (sigma pharmaceuticals plc)                                   |
| 55794        | other ulcer healing drugs      | glycopyrronium bromide | glycopyrronium bromide 5mg/5ml oral suspension                                                               |
| 50047        | other ulcer healing drugs      | glycopyrronium bromide | glycopyrronium bromide 5mg/5ml oral solution                                                                 |
| 56262        | other ulcer healing drugs      | glycopyrronium bromide | glycopyrronium bromide 200micrograms/5ml oral solution                                                       |
| 61879        | antimuscarinic bronchodilators |                        | incuse ellipta 55micrograms/dose dry powder inhaler (glaxosmithkline uk ltd)                                 |
| 53761        | antimuscarinic bronchodilators |                        | glycopyrronium bromide 55microgram inhalation powder capsules with device                                    |
| 746          | antimuscarinic bronchodilators | tiotropium bromide     | tiotropium 18 microgram capsule                                                                              |
| 38538        | other ulcer healing drugs      | glycopyrronium bromide | glycopyrronium bromide 2mg/5ml oral suspension                                                               |
| 46214        | antimuscarinics                | glycopyrronium bromide | glycopyrronium bromide 5mg/5ml oral solution                                                                 |

| Product code | BNF header                     | Drug substance     | Drug product                                                                                               |
|--------------|--------------------------------|--------------------|------------------------------------------------------------------------------------------------------------|
| 61582        | antimuscarinic bronchodilators | tiotropium bromide | spiriva respimat 2.5micrograms/dose solution for inhalation cartridge with device (waymade healthcare plc) |

## LABA codes

| Product code | BNF header                                | Drug substance                | Drug product                                                                                 |
|--------------|-------------------------------------------|-------------------------------|----------------------------------------------------------------------------------------------|
| 45610        | selective beta 2 agonists                 | indacaterol maleate           | indacaterol 300microgram inhalation powder capsules with device                              |
| 7270         | selective beta 2 agonists                 | salmeterol xinafoate          | salmeterol 25micrograms/dose inhaler cfc free                                                |
| 10968        | selective beta 2 agonists                 | formoterol fumarate dihydrate | foradil 12microgram inhalation powder capsules with device (novartis pharmaceuticals uk ltd) |
| 549          | unknown                                   | salmeterol xinafoate          | serevent 25micrograms/dose inhaler (glaxosmithkline uk ltd)                                  |
| 7133         | selective beta 2 agonists                 | formoterol fumarate dihydrate | formoterol 12micrograms/dose dry powder inhaler                                              |
| 54742        | selective beta 2 agonists                 | salmeterol xinafoate          | salmeterol 25micrograms/dose inhaler cfc free (a a h pharmaceuticals ltd)                    |
| 719          | selective beta 2 agonists                 | salmeterol xinafoate          | salmeterol 50micrograms/dose dry powder inhaler                                              |
| 57694        | selective beta 2 agonists                 | salmeterol xinafoate          | vertine 25micrograms/dose inhaler cfc free (teva uk ltd)                                     |
| 26829        | selective beta 2 agonists                 | tulobuterol                   | breloomax 2mg tablet (abbott laboratories ltd)                                               |
| 19799        | selective beta 2 agonists                 | tulobuterol                   | tulobuterol 2mg                                                                              |
| 56482        | selective beta 2 agonists                 | formoterol fumarate dihydrate | oxis 12 turbohaler (waymade healthcare plc)                                                  |
| 25784        | selective beta 2 agonists                 | formoterol fumarate dihydrate | atimos modulite 12micrograms/dose inhaler (chiesi ltd)                                       |
| 47638        | selective beta 2 agonists                 | salmeterol xinafoate          | neevent 25micrograms/dose inhaler cfc free (kent pharmaceuticals ltd)                        |
| 10672        | peripheral vasodilators and related drugs | moxisylyte hydrochloride      | opilon 40mg tablet (concord pharmaceuticals ltd)                                             |
| 50051        | selective beta 2 agonists                 | salmeterol xinafoate          | serevent 25micrograms/dose evohaler (waymade healthcare plc)                                 |
| 35725        | selective beta 2 agonists                 | formoterol fumarate dihydrate | formoterol easyhaler 12micrograms/dose dry powder inhaler (orion pharma (uk) ltd)            |

| Product code | BNF header                                | Drug substance                | Drug product                                                                                            |
|--------------|-------------------------------------------|-------------------------------|---------------------------------------------------------------------------------------------------------|
| 2224         | selective beta 2 agonists                 | salmeterol xinafoate          | serevent 50micrograms/dose accuhaler (glaxosmithkline uk ltd)                                           |
| 43893        | selective beta 2 agonists                 | indacaterol maleate           | onbrez breezhaler 150microgram inhalation powder capsules with device (novartis pharmaceuticals uk ltd) |
| 6526         | selective beta 2 agonists                 | formoterol fumarate dihydrate | formoterol 12microgram inhalation powder capsules with device                                           |
| 43738        | selective beta 2 agonists                 | indacaterol maleate           | indacaterol 150microgram inhalation powder capsules with device                                         |
| 35825        | selective beta 2 agonists                 | salmeterol xinafoate          | serevent 50microgram disks (glaxosmithkline uk ltd)                                                     |
| 43764        | peripheral vasodilators and related drugs | moxisylyte hydrochloride      | opilon 40mg tablets (archimedes pharma uk ltd)                                                          |
| 56478        | selective beta 2 agonists                 | salmeterol xinafoate          | serevent 50micrograms/dose accuhaler (de pharmaceuticals)                                               |
| 42103        | selective beta 2 agonists                 | tulobuterol                   | tulobuterol 1mg/5ml sugar free syrup                                                                    |
| 57544        | selective beta 2 agonists                 | salmeterol xinafoate          | serevent 50micrograms/dose accuhaler (waymade healthcare plc)                                           |
| 3297         | selective beta 2 agonists                 | salmeterol xinafoate          | salmeterol 50micrograms disc                                                                            |
| 57558        | selective beta 2 agonists                 | formoterol fumarate dihydrate | oxis 6 turbohaler (lexon (uk) ltd)                                                                      |
| 9711         | selective beta 2 agonists                 | formoterol fumarate dihydrate | formoterol 6micrograms/dose dry powder inhaler                                                          |
| 35542        | selective beta 2 agonists                 | salmeterol xinafoate          | salmeterol 50microgram inhalation powder blisters with device                                           |
| 465          | unknown                                   | salmeterol xinafoate          | salmeterol 25micrograms/dose inhaler                                                                    |
| 44064        | selective beta 2 agonists                 | indacaterol maleate           | onbrez breezhaler 300microgram inhalation powder capsules with device (novartis pharmaceuticals uk ltd) |
| 35165        | selective beta 2 agonists                 | salmeterol xinafoate          | serevent 50microgram disks with diskhaler (glaxosmithkline uk ltd)                                      |
| 14306        | selective beta 2 agonists                 | formoterol fumarate dihydrate | formoterol 12micrograms/dose inhaler cfc free                                                           |
| 1974         | selective beta 2 agonists                 | formoterol fumarate dihydrate | oxis 12 turbohaler (astrazeneca uk ltd)                                                                 |
| 7268         | selective beta 2 agonists                 | salmeterol xinafoate          | serevent 25micrograms/dose evohaler (glaxosmithkline uk ltd)                                            |
| 8365         | peripheral vasodilators and related drugs | moxisylyte hydrochloride      | moxisylyte 40mg tablets                                                                                 |
| 35503        | selective beta 2 agonists                 | salmeterol xinafoate          | salmeterol 50microgram inhalation powder blisters                                                       |
| 1975         | selective beta 2 agonists                 | formoterol fumarate dihydrate | oxis 6 turbohaler (astrazeneca uk ltd)                                                                  |
| 22663        | selective beta 2 agonists                 | tulobuterol                   | respacal 2mg tablet (ucb pharma ltd)                                                                    |

| <b>Product code</b> | <b>BNF header</b>         | <b>Drug substance</b> | <b>Drug product</b>                                                      |
|---------------------|---------------------------|-----------------------|--------------------------------------------------------------------------|
| 910                 | selective beta 2 agonists | salmeterol xinafoate  | serevent diskhaler 50microgram inhalation powder (glaxo wellcome uk ltd) |

## ICS codes

| Product code | BNF header                                   | Drug substance             | Drug product                                                                     |
|--------------|----------------------------------------------|----------------------------|----------------------------------------------------------------------------------|
| 54399        | corticosteroids (for respiratory conditions) | beclometasone dipropionate | qvar 100 autohaler (sigma pharmaceuticals plc)                                   |
| 959          | unknown                                      | budesonide                 | budesonide 50micrograms/dose inhaler                                             |
| 2951         | corticosteroids (for respiratory conditions) | fluticasone propionate     | fluticasone 250microgram/actuation pressurised inhalation                        |
| 50129        | corticosteroids (for respiratory conditions) | beclometasone dipropionate | qvar 100micrograms/dose easi-breathe inhaler (de pharmaceuticals)                |
| 2229         | corticosteroids (for respiratory conditions) | beclometasone dipropionate | becodisks 100microgram disc (allen & hanburys ltd)                               |
| 3989         | corticosteroids (for respiratory conditions) | fluticasone propionate     | flixtide 100microgram disc (allen & hanburys ltd)                                |
| 5551         | corticosteroids (for respiratory conditions) | fluticasone propionate     | flixtide 0.5mg/2ml nebulas (glaxosmithkline uk ltd)                              |
| 34794        | corticosteroids (for respiratory conditions) | beclometasone dipropionate | beclometasone 200micrograms/dose inhaler (a a h pharmaceuticals ltd)             |
| 41269        | corticosteroids (for respiratory conditions) | beclometasone dipropionate | beclometasone 400 cyclocaps (teva uk ltd)                                        |
| 29325        | corticosteroids (for respiratory conditions) | beclometasone dipropionate | beclometasone 250micrograms/dose inhaler (generics (uk) ltd)                     |
| 4499         | corticosteroids (for respiratory conditions) | beclometasone dipropionate | aerobec 250microgram/actuation pressurised inhalation (meda pharmaceuticals ltd) |
| 57589        | corticosteroids (for respiratory conditions) | beclometasone dipropionate | becloforte 250micrograms/dose inhaler (dowelhurst ltd)                           |
| 32874        | corticosteroids (for respiratory conditions) | beclometasone dipropionate | beclometasone 50microgram/actuation inhalation powder (actavis uk ltd)           |
| 2159         | corticosteroids (for respiratory conditions) | beclometasone dipropionate | aerobec 50 autohaler (meda pharmaceuticals ltd)                                  |
| 14590        | corticosteroids (for respiratory conditions) | beclometasone dipropionate | asmabec 250microgram/actuation spacehaler (celltech pharma europe ltd)           |
| 1725         | corticosteroids (for respiratory conditions) | beclometasone dipropionate | beclazone 50 easi-breathe inhaler (teva uk ltd)                                  |
| 908          | corticosteroids (for respiratory conditions) | budesonide                 | pulmicort 400 turbohaler (astrazeneca uk ltd)                                    |
| 35288        | corticosteroids (for respiratory conditions) | beclometasone dipropionate | beclometasone 400microgram inhalation powder blisters                            |
| 49367        | corticosteroids (for respiratory conditions) | beclometasone dipropionate | clenil modulite 50micrograms/dose inhaler (mawdsley-brooks & company ltd)        |
| 35107        | corticosteroids (for respiratory conditions) | beclometasone dipropionate | beclometasone 400microgram inhalation powder blisters with device                |

| Product code | BNF header                                   | Drug substance             | Drug product                                                                           |
|--------------|----------------------------------------------|----------------------------|----------------------------------------------------------------------------------------|
| 1676         | corticosteroids (for respiratory conditions) | fluticasone propionate     | flixotide 125microgram/actuation inhalation powder (allen & hanburys ltd)              |
| 49772        | corticosteroids (for respiratory conditions) | fluticasone propionate     | fluticasone 250micrograms/dose evohaler (sigma pharmaceuticals plc)                    |
| 48088        | unknown                                      | budesonide                 | budenofalk 9mg gastro-resistant granules sachets (dr. falk pharma uk ltd)              |
| 33258        | corticosteroids (for respiratory conditions) | beclometasone dipropionate | beclometasone 250micrograms/dose inhaler (a a h pharmaceuticals ltd)                   |
| 13037        | corticosteroids (for respiratory conditions) | beclometasone dipropionate | pulvinal beclometasone dipropionate 200micrograms/dose dry powder inhaler (chiesi ltd) |
| 19031        | corticosteroids (for respiratory conditions) | beclometasone dipropionate | bdp 100microgram/actuation spacehaler (celltech pharma europe ltd)                     |
| 16158        | corticosteroids (for respiratory conditions) | beclometasone dipropionate | clenil modulite 50micrograms/dose inhaler (chiesi ltd)                                 |
| 2124         | unknown                                      |                            | pulmicort refill 200 mcg inh                                                           |
| 4759         | corticosteroids (for respiratory conditions) | beclometasone dipropionate | beclometasone 100microgram inhalation powder capsules                                  |
| 3753         | unknown                                      |                            | flixotide diskhaler-community pack 250 mcg                                             |
| 49711        | corticosteroids (for respiratory conditions) | budesonide                 | pulmicort 200micrograms/dose inhaler (astrazeneca uk ltd)                              |
| 15326        | corticosteroids (for respiratory conditions) | beclometasone dipropionate | beclometasone 100micrograms/dose inhaler cfc free                                      |
| 2335         | corticosteroids (for respiratory conditions) | beclometasone dipropionate | qvar 100 inhaler (teva uk ltd)                                                         |
| 5580         | corticosteroids (for respiratory conditions) | fluticasone propionate     | flixotide accuhaler 50 50microgram/inhalation inhalation powder (allen & hanburys ltd) |
| 51681        | corticosteroids (for respiratory conditions) | beclometasone dipropionate | qvar 100 inhaler (sigma pharmaceuticals plc)                                           |
| 8433         | corticosteroids (for respiratory conditions) | budesonide                 | budesonide 100micrograms/actuation inhaler                                             |
| 9577         | corticosteroids (for respiratory conditions) | beclometasone dipropionate | asmabec 50 clickhaler (focus pharmaceuticals ltd)                                      |
| 2723         | corticosteroids (for respiratory conditions) | fluticasone propionate     | fluticasone 25micrograms/dose inhaler                                                  |
| 23675        | unknown                                      |                            | pulmicort l.s. refill                                                                  |
| 35638        | corticosteroids (for respiratory conditions) | fluticasone propionate     | fluticasone propionate 100microgram inhalation powder blisters with device             |
| 9571         | corticosteroids (for respiratory conditions) | beclometasone dipropionate | beclometasone 250micrograms/actuation vortex inhaler                                   |
| 51234        | corticosteroids (for respiratory conditions) | beclometasone dipropionate | qvar 100 inhaler (waymade healthcare plc)                                              |



| Product code | BNF header                                   | Drug substance             | Drug product                                                                           |
|--------------|----------------------------------------------|----------------------------|----------------------------------------------------------------------------------------|
| 60946        | corticosteroids (in chronic bowel disorders) | budesonide                 | entocort cr 3mg capsules (waymade healthcare plc)                                      |
| 5223         | corticosteroids (for respiratory conditions) | fluticasone propionate     | fluticasone 50micrograms/dose inhaler cfc free                                         |
| 53057        | corticosteroids (for respiratory conditions) | fluticasone propionate     | flixtide 50micrograms/dose evohaler (lexon (uk) ltd)                                   |
| 13290        | corticosteroids (for respiratory conditions) | beclometasone dipropionate | clenil modulite 100micrograms/dose inhaler (chiesi ltd)                                |
| 42928        | corticosteroids (for respiratory conditions) | fluticasone propionate     | flixtide 100micrograms/dose accuhaler (glaxosmithkline uk ltd)                         |
| 14736        | corticosteroids (for respiratory conditions) | beclometasone dipropionate | pulvinal beclometasone dipropionate 400micrograms/dose dry powder inhaler (chiesi ltd) |
| 52806        | corticosteroids (for respiratory conditions) | beclometasone dipropionate | qvar 100 autohaler (lexon (uk) ltd)                                                    |
| 57525        | corticosteroids (for respiratory conditions) | fluticasone propionate     | flixtide 250micrograms/dose accuhaler (stephar (u.k.) ltd)                             |
| 33849        | corticosteroids (for respiratory conditions) | beclometasone dipropionate | beclometasone 100microgram/actuation inhalation powder (neo laboratories ltd)          |
| 52732        | corticosteroids (for respiratory conditions) | budesonide                 | pulmicort 0.5mg respules (necessity supplies ltd)                                      |
| 35611        | corticosteroids (for respiratory conditions) | fluticasone propionate     | flixtide 250microgram disks (glaxosmithkline uk ltd)                                   |
| 8111         | corticosteroids (for respiratory conditions) | beclometasone dipropionate | becloforte vm 250microgram/actuation vm pack (allen & hanburys ltd)                    |
| 39879        | unknown                                      | budesonide                 | budesonide 200micrograms/dose inhaler cfc free                                         |
| 1242         | corticosteroids (for respiratory conditions) | beclometasone dipropionate | beclometasone 250micrograms/dose inhaler                                               |
| 26665        | unknown                                      |                            | pulmicort complete                                                                     |
| 37447        | corticosteroids (for respiratory conditions) | fluticasone propionate     | fluticasone propionate 50microgram inhalation powder blisters                          |
| 5718         | corticosteroids (for respiratory conditions) | fluticasone propionate     | flixtide 125micrograms/dose evohaler (glaxosmithkline uk ltd)                          |
| 7653         | corticosteroids (for respiratory conditions) | beclometasone dipropionate | beclometasone 400microgram inhalation powder capsules                                  |
| 28640        | corticosteroids (for respiratory conditions) | beclometasone dipropionate | beclometasone 100microgram/actuation inhalation powder (actavis uk ltd)                |
| 4365         | corticosteroids (for respiratory conditions) | beclometasone dipropionate | beclometasone 100micrograms disc                                                       |
| 34739        | corticosteroids (for respiratory conditions) | beclometasone dipropionate | beclometasone 50micrograms/dose inhaler (teva uk ltd)                                  |
| 8635         | corticosteroids (for respiratory conditions) | fluticasone propionate     | flixtide 50microgram disc (allen & hanburys ltd)                                       |

| Product code | BNF header                                   | Drug substance             | Drug product                                                                       |
|--------------|----------------------------------------------|----------------------------|------------------------------------------------------------------------------------|
| 57579        | corticosteroids (for respiratory conditions) | fluticasone propionate     | flixtotide 50micrograms/dose accuhaler (de pharmaceuticals)                        |
| 4413         | corticosteroids (for respiratory conditions) | beclometasone dipropionate | qvar 100 autohaler (teva uk ltd)                                                   |
| 37203        | corticosteroids (in chronic bowel disorders) | beclometasone dipropionate | beclometasone 5mg gastro-resistant modified-release tablets                        |
| 4132         | corticosteroids (for respiratory conditions) | fluticasone propionate     | fluticasone 125microgram/actuation pressurised inhalation                          |
| 3018         | corticosteroids (for respiratory conditions) | beclometasone dipropionate | beclometasone 50micrograms/dose inhaler                                            |
| 9233         | corticosteroids (for respiratory conditions) | beclometasone dipropionate | beclometasone 200microgram inhalation powder capsules                              |
| 2160         | corticosteroids (for respiratory conditions) | beclometasone dipropionate | beclometasone 50micrograms/dose breath actuated inhaler                            |
| 2148         | corticosteroids (for respiratory conditions) | beclometasone dipropionate | beclometasone 400microgram disc                                                    |
| 34919        | corticosteroids (for respiratory conditions) | beclometasone dipropionate | beclometasone 50micrograms/dose inhaler (a a h pharmaceuticals ltd)                |
| 2092         | corticosteroids (for respiratory conditions) | budesonide                 | budesonide 200micrograms/dose dry powder inhaler                                   |
| 21005        | corticosteroids (for respiratory conditions) | beclometasone dipropionate | beclometasone 250micrograms/dose inhaler cfc free                                  |
| 10090        | corticosteroids (for respiratory conditions) | beclometasone dipropionate | beclometasone 50micrograms/actuation extrafine particle cfc free inhaler           |
| 1551         | corticosteroids (for respiratory conditions) | beclometasone dipropionate | beclazone 250 inhaler (teva uk ltd)                                                |
| 39067        | corticosteroids (in chronic bowel disorders) | beclometasone dipropionate | clipper 5mg gastro-resistant modified-release tablets (chiesi ltd)                 |
| 51415        | corticosteroids (for respiratory conditions) | beclometasone dipropionate | qvar 50 inhaler (mawdsley-brooks & company ltd)                                    |
| 35106        | corticosteroids (for respiratory conditions) | beclometasone dipropionate | becodisks 100microgram with diskhaler (glaxosmithkline uk ltd)                     |
| 35299        | corticosteroids (for respiratory conditions) | beclometasone dipropionate | becodisks 400microgram (glaxosmithkline uk ltd)                                    |
| 54207        | corticosteroids (for respiratory conditions) | beclometasone dipropionate | qvar 50 inhaler (de pharmaceuticals)                                               |
| 3927         | corticosteroids (for respiratory conditions) | beclometasone dipropionate | filair 100 inhaler (meda pharmaceuticals ltd)                                      |
| 17670        | corticosteroids (for respiratory conditions) | budesonide                 | easyhaler budesonide 100micrograms/dose dry powder inhaler (orion pharma (uk) ltd) |
| 883          | corticosteroids (for respiratory conditions) | beclometasone dipropionate | becodisks 200microgram disc (allen & hanburys ltd)                                 |
| 8450         | unknown                                      |                            | flixtotide diskhaler-community pack 50 mcg                                         |
| 3289         | corticosteroids (for respiratory conditions) | fluticasone propionate     | flixtotide 25micrograms/dose inhaler (glaxosmithkline uk ltd)                      |

| Product code | BNF header                                   | Drug substance             | Drug product                                                                                              |
|--------------|----------------------------------------------|----------------------------|-----------------------------------------------------------------------------------------------------------|
| 53480        | corticosteroids (for respiratory conditions) | beclometasone dipropionate | qvar 100 autohaler (stephar (u.k.) ltd)                                                                   |
| 39102        | unknown                                      | budesonide                 | budesonide 100micrograms/dose inhaler cfc free                                                            |
| 20763        | unknown                                      |                            | becloforte                                                                                                |
| 35374        | corticosteroids (for respiratory conditions) | fluticasone propionate     | flixtide 500microgram disks (glaxosmithkline uk ltd)                                                      |
| 39200        | corticosteroids (for respiratory conditions) | beclometasone dipropionate | aerobec forte 250 autohaler (meda pharmaceuticals ltd)                                                    |
| 9599         | corticosteroids (for respiratory conditions) | beclometasone dipropionate | beclazone 50microgram/actuation inhalation powder (actavis uk ltd)                                        |
| 5804         | corticosteroids (for respiratory conditions) | beclometasone dipropionate | beclometasone 250micrograms/dose dry powder inhaler                                                       |
| 47943        | corticosteroids (for respiratory conditions) | beclometasone dipropionate | beclazone easi-breathe (roi) 100microgram/actuation pressurised inhalation (ivax pharmaceuticals ireland) |
| 5683         | corticosteroids (for respiratory conditions) | fluticasone propionate     | flixtide 250micrograms/dose evohaler (glaxosmithkline uk ltd)                                             |
| 48340        | corticosteroids (for respiratory conditions) | beclometasone dipropionate | clenil modulite 100micrograms/dose inhaler (mawdsley-brooks & company ltd)                                |
| 1885         | corticosteroids (for respiratory conditions) | beclometasone dipropionate | beclazone 200 inhaler (teva uk ltd)                                                                       |
| 911          | corticosteroids (for respiratory conditions) | fluticasone propionate     | flixtide accuhaler 250 250microgram/inhalation inhalation powder (allen & hanburys ltd)                   |
| 6095         | corticosteroids (in chronic bowel disorders) | budesonide                 | budesonide 3mg gastro-resistant capsules                                                                  |
| 28073        | corticosteroids (for respiratory conditions) | beclometasone dipropionate | beclometasone 250microgram/actuation pressurised inhalation (approved prescription services ltd)          |
| 4131         | corticosteroids (for respiratory conditions) | fluticasone propionate     | fluticasone 100microgram disc                                                                             |
| 43074        | corticosteroids (for respiratory conditions) | fluticasone propionate     | flixtide 500micrograms/dose accuhaler (glaxosmithkline uk ltd)                                            |
| 35905        | corticosteroids (for respiratory conditions) | fluticasone propionate     | fluticasone propionate 250microgram inhalation powder blisters                                            |
| 27583        | unknown                                      |                            | pulmicort                                                                                                 |
| 17654        | corticosteroids (for respiratory conditions) | beclometasone dipropionate | easyhaler beclometasone 200micrograms/dose dry powder inhaler (orion pharma (uk) ltd)                     |
| 4545         | corticosteroids (for respiratory conditions) | budesonide                 | pulmicort ls 50microgram refill canister (astrazeneca uk ltd)                                             |
| 1412         | corticosteroids (for respiratory conditions) | fluticasone propionate     | flixtide 250microgram/actuation inhalation powder (allen & hanburys ltd)                                  |

| Product code | BNF header                                   | Drug substance             | Drug product                                                                              |
|--------------|----------------------------------------------|----------------------------|-------------------------------------------------------------------------------------------|
| 3363         | corticosteroids (for respiratory conditions) | beclometasone dipropionate | becloforte 400microgram disks with diskhaler (glaxosmithkline uk ltd)                     |
| 36462        | corticosteroids (for respiratory conditions) | fluticasone propionate     | fluticasone propionate 500microgram inhalation powder blisters                            |
| 56471        | corticosteroids (for respiratory conditions) | beclometasone dipropionate | becodisks 200microgram (mawdsley-brooks & company ltd)                                    |
| 14294        | corticosteroids (for respiratory conditions) | beclometasone dipropionate | qvar 50micrograms/dose easi-breathe inhaler (teva uk ltd)                                 |
| 3570         | corticosteroids (for respiratory conditions) | budesonide                 | budesonide 200micrograms/actuation refill canister                                        |
| 9164         | corticosteroids (for respiratory conditions) | fluticasone propionate     | fluticasone propionate 50micrograms/dose dry powder inhaler                               |
| 27188        | corticosteroids (for respiratory conditions) | budesonide                 | easyhaler budesonide 200micrograms/dose dry powder inhaler (orion pharma (uk) ltd)        |
| 39099        | unknown                                      | budesonide                 | pulmicort 100micrograms/dose inhaler cfc free (astrazeneca uk ltd)                        |
| 4926         | corticosteroids (for respiratory conditions) | fluticasone propionate     | flixtotide accuhaler 100 100microgram/inhalation inhalation powder (allen & hanburys ltd) |
| 1642         | corticosteroids (for respiratory conditions) | budesonide                 | budesonide 400micrograms/dose dry powder inhaler                                          |
| 34859        | corticosteroids (for respiratory conditions) | beclometasone dipropionate | beclometasone 250microgram/actuation inhalation powder (neo laboratories ltd)             |
| 16054        | corticosteroids (for respiratory conditions) | budesonide                 | budesonide 200micrograms/actuation breath actuated powder inhaler                         |
| 960          | corticosteroids (for respiratory conditions) | budesonide                 | pulmicort 100 turbohaler (astrazeneca uk ltd)                                             |
| 51480        | corticosteroids (for respiratory conditions) | beclometasone dipropionate | qvar 100 autohaler (de pharmaceuticals)                                                   |
| 7891         | corticosteroids (for respiratory conditions) | fluticasone propionate     | fluticasone 500microgram disc                                                             |
| 56462        | corticosteroids (for respiratory conditions) | beclometasone dipropionate | becodisks 400microgram (waymade healthcare plc)                                           |
| 7638         | corticosteroids (for respiratory conditions) | fluticasone propionate     | fluticasone 250microgram disc                                                             |
| 15706        | corticosteroids (for respiratory conditions) | beclometasone dipropionate | beclometasone 100 micrograms/actuation vortex inhaler                                     |
| 27915        | unknown                                      |                            | fluticasone prop disk refill                                                              |
| 2893         | corticosteroids (for respiratory conditions) | beclometasone dipropionate | beclometasone 200micrograms disc                                                          |
| 5885         | corticosteroids (for respiratory conditions) | fluticasone propionate     | fluticasone propionate 100micrograms/dose dry powder inhaler                              |

| Product code | BNF header                                   | Drug substance             | Drug product                                                                                 |
|--------------|----------------------------------------------|----------------------------|----------------------------------------------------------------------------------------------|
| 3898         | corticosteroids (in chronic bowel disorders) | budesonide                 | budesonide 3mg gastro-resistant modified-release capsules                                    |
| 3546         | corticosteroids (for respiratory conditions) | beclometasone dipropionate | qvar 50 inhaler (teva uk ltd)                                                                |
| 30210        | corticosteroids (for respiratory conditions) | beclometasone dipropionate | beclometasone 250micrograms/dose inhaler (teva uk ltd)                                       |
| 1552         | corticosteroids (for respiratory conditions) | beclometasone dipropionate | becloforte easi-breathe 250microgram/actuation pressurised inhalation (allen & hanburys ltd) |
| 5822         | corticosteroids (for respiratory conditions) | fluticasone propionate     | fluticasone 250micrograms/dose inhaler cfc free                                              |
| 35430        | corticosteroids (for respiratory conditions) | beclometasone dipropionate | becodisks 200microgram with diskhaler (glaxosmithkline uk ltd)                               |
| 42994        | corticosteroids (for respiratory conditions) | fluticasone propionate     | flixtide 250micrograms/dose accuhaler (glaxosmithkline uk ltd)                               |
| 36290        | corticosteroids (for respiratory conditions) | fluticasone propionate     | flixtide 50microgram disks with diskhaler (glaxosmithkline uk ltd)                           |
| 24898        | corticosteroids (for respiratory conditions) | beclometasone dipropionate | spacehaler bdp 100microgram/actuation spacehaler (celltech pharma europe ltd)                |
| 35700        | corticosteroids (for respiratory conditions) | fluticasone propionate     | fluticasone propionate 500microgram inhalation powder blisters with device                   |
| 3188         | unknown                                      |                            | pulmicort complete 50 mcg inh                                                                |
| 7788         | corticosteroids (for respiratory conditions) | budesonide                 | budesonide 100micrograms/dose dry powder inhaler                                             |
| 35293        | corticosteroids (for respiratory conditions) | beclometasone dipropionate | beclometasone 200microgram inhalation powder blisters with device                            |
| 8251         | unknown                                      |                            | pulmicort refill 50 mg inh                                                                   |
| 1259         | corticosteroids (for respiratory conditions) | beclometasone dipropionate | beclometasone 200micrograms/dose inhaler                                                     |
| 16525        | corticosteroids (in chronic bowel disorders) | budesonide                 | budenofalk 3mg gastro-resistant capsules (dr. falk pharma uk ltd)                            |
| 1680         | corticosteroids (for respiratory conditions) | budesonide                 | pulmicort ls 50micrograms/dose inhaler (astrazeneca uk ltd)                                  |
| 10254        | corticosteroids (for respiratory conditions) | mometasone furoate         | mometasone 400micrograms/dose dry powder inhaler                                             |
| 20812        | unknown                                      |                            | pulmicort refill                                                                             |
| 14524        | corticosteroids (for respiratory conditions) | beclometasone dipropionate | bdp 250microgram/actuation spacehaler (celltech pharma europe ltd)                           |
| 2992         | corticosteroids (for respiratory conditions) | beclometasone dipropionate | beclazone 50 inhaler (teva uk ltd)                                                           |
| 7602         | corticosteroids (for respiratory conditions) | fluticasone propionate     | fluticasone 50microgram disc                                                                 |

| Product code | BNF header                                   | Drug substance             | Drug product                                                                                  |
|--------------|----------------------------------------------|----------------------------|-----------------------------------------------------------------------------------------------|
| 16305        | corticosteroids (for respiratory conditions) | fluticasone propionate     | flixtide 2mg/2ml nebules (glaxosmithkline uk ltd)                                             |
| 14757        | corticosteroids (for respiratory conditions) | beclometasone dipropionate | pulvinal beclometasone dipropionate 100micrograms/dose dry powder inhaler (chiesi ltd)        |
| 909          | unknown                                      | budesonide                 | budesonide 200micrograms/dose inhaler                                                         |
| 1959         | corticosteroids (for respiratory conditions) | budesonide                 | pulmicort 0.5mg respules (astrazeneca uk ltd)                                                 |
| 1861         | corticosteroids (for respiratory conditions) | beclometasone dipropionate | aerobec 100 autohaler (meda pharmaceuticals ltd)                                              |
| 16018        | corticosteroids (for respiratory conditions) | mometasone furoate         | mometasone 200micrograms/dose dry powder inhaler                                              |
| 35631        | corticosteroids (for respiratory conditions) | budesonide                 | budelin novolizer 200micrograms/dose inhalation powder (meda pharmaceuticals ltd)             |
| 60937        | corticosteroids (for respiratory conditions) | budesonide                 | pulmicort 200 turbohaler (dowelhurst ltd)                                                     |
| 50037        | corticosteroids (for respiratory conditions) | budesonide                 | pulmicort 0.5mg respules (waymade healthcare plc)                                             |
| 19389        | corticosteroids (for respiratory conditions) | beclometasone dipropionate | asmabec 50microgram/actuation spacehaler (celltech pharma europe ltd)                         |
| 2282         | corticosteroids (for respiratory conditions) | fluticasone propionate     | fluticasone propionate 500micrograms/dose dry powder inhaler                                  |
| 18848        | corticosteroids (for respiratory conditions) | beclometasone dipropionate | qvar 100micrograms/dose easi-breathe inhaler (teva uk ltd)                                    |
| 2440         | corticosteroids (for respiratory conditions) | fluticasone propionate     | flixtide accuhaler 500 500microgram/inhalation inhalation powder (allen & hanburys ltd)       |
| 23741        | corticosteroids (for respiratory conditions) | budesonide                 | novolizer budesonide 200microgram/actuation pressurised inhalation (meda pharmaceuticals ltd) |
| 3988         | unknown                                      |                            | flixtide diskhaler-community pack 100 mcg                                                     |
| 35724        | corticosteroids (for respiratory conditions) | budesonide                 | budelin novolizer 200micrograms/dose inhalation powder refill (meda pharmaceuticals ltd)      |
| 1380         | corticosteroids (in chronic bowel disorders) | budesonide                 | entocort cr 3mg capsules (astrazeneca uk ltd)                                                 |
| 56144        | corticosteroids (in chronic bowel disorders) | budesonide                 | budenofalk 9mg gastro-resistant granules sachets (dr. falk pharma uk ltd)                     |
| 56475        | corticosteroids (for respiratory conditions) | fluticasone propionate     | flixtide 50micrograms/dose accuhaler (sigma pharmaceuticals plc)                              |
| 40057        | corticosteroids (for respiratory conditions) | budesonide                 | pulmicort 200micrograms/dose inhaler cfc free (astrazeneca uk ltd)                            |
| 1236         | corticosteroids (for respiratory conditions) | beclometasone dipropionate | becloforte 250micrograms/dose inhaler (glaxosmithkline uk ltd)                                |

| Product code | BNF header                                   | Drug substance             | Drug product                                                              |
|--------------|----------------------------------------------|----------------------------|---------------------------------------------------------------------------|
| 11497        | corticosteroids (for respiratory conditions) | beclometasone dipropionate | beclometasone 400micrograms/dose dry powder inhaler                       |
| 35408        | corticosteroids (for respiratory conditions) | beclometasone dipropionate | becodisks 100microgram (glaxosmithkline uk ltd)                           |
| 34315        | corticosteroids (for respiratory conditions) | beclometasone dipropionate | beclometasone 250microgram/actuation inhalation powder (actavis uk ltd)   |
| 956          | corticosteroids (for respiratory conditions) | budesonide                 | pulmicort 200 turbohaler (astrazeneca uk ltd)                             |
| 18394        | corticosteroids (for respiratory conditions) | beclometasone dipropionate | bdp 50microgram/actuation spacehaler (celltech pharma europe ltd)         |
| 14321        | corticosteroids (for respiratory conditions) | beclometasone dipropionate | beclometasone 200micrograms/dose inhaler cfc free                         |
| 11732        | corticosteroids (for respiratory conditions) | beclometasone dipropionate | beclometasone 50micrograms/dose breath actuated inhaler cfc free          |
| 3993         | corticosteroids (for respiratory conditions) | beclometasone dipropionate | filair forte 250micrograms/dose inhaler (meda pharmaceuticals ltd)        |
| 35225        | corticosteroids (for respiratory conditions) | fluticasone propionate     | flixtotide 100microgram disks with diskhaler (glaxosmithkline uk ltd)     |
| 5521         | corticosteroids (for respiratory conditions) | beclometasone dipropionate | beclometasone 200micrograms/dose dry powder inhaler                       |
| 4601         | corticosteroids (for respiratory conditions) | beclometasone dipropionate | asmabec 100 clickhaler (focus pharmaceuticals ltd)                        |
| 16148        | corticosteroids (for respiratory conditions) | beclometasone dipropionate | clenil modulite 250micrograms/dose inhaler (chiesi ltd)                   |
| 2892         | corticosteroids (for respiratory conditions) | beclometasone dipropionate | becloforte 400microgram disks (glaxosmithkline uk ltd)                    |
| 35071        | corticosteroids (for respiratory conditions) | beclometasone dipropionate | becodisks 200microgram (glaxosmithkline uk ltd)                           |
| 35510        | corticosteroids (for respiratory conditions) | budesonide                 | budesonide 200micrograms/dose dry powder inhalation cartridge with device |
| 14567        | corticosteroids (for respiratory conditions) | beclometasone dipropionate | asmabec 250 clickhaler (focus pharmaceuticals ltd)                        |
| 56498        | corticosteroids (for respiratory conditions) | budesonide                 | pulmicort 200 turbohaler (waymade healthcare plc)                         |
| 24660        | unknown                                      |                            | betamethasone valerate                                                    |
| 51997        | corticosteroids (in chronic bowel disorders) | budesonide                 | budesonide 9mg gastro-resistant granules sachets                          |
| 1734         | corticosteroids (for respiratory conditions) | beclometasone dipropionate | beclometasone 100micrograms/dose breath actuated inhaler                  |
| 36090        | corticosteroids (for respiratory conditions) | fluticasone propionate     | flixtotide 100microgram disks (glaxosmithkline uk ltd)                    |
| 5975         | corticosteroids (for respiratory conditions) | fluticasone propionate     | fluticasone 125micrograms/dose inhaler cfc free                           |
| 19401        | corticosteroids (for respiratory conditions) | beclometasone dipropionate | beclometasone 250micrograms/actuation inhaler and compact spacer          |

| Product code | BNF header                                   | Drug substance             | Drug product                                                                                    |
|--------------|----------------------------------------------|----------------------------|-------------------------------------------------------------------------------------------------|
| 895          | corticosteroids (for respiratory conditions) | beclometasone dipropionate | beclazone 100 easi-breathe inhaler (teva uk ltd)                                                |
| 51815        | corticosteroids (for respiratory conditions) | fluticasone propionate     | flixtotide 250micrograms/dose evohaler (waymade healthcare plc)                                 |
| 36021        | corticosteroids (for respiratory conditions) | fluticasone propionate     | fluticasone propionate 50microgram inhalation powder blisters with device                       |
| 11198        | corticosteroids (for respiratory conditions) | beclometasone dipropionate | beclometasone 50 micrograms/actuation vortex inhaler                                            |
| 50287        | corticosteroids (for respiratory conditions) | beclometasone dipropionate | qvar 100 inhaler (de pharmaceuticals)                                                           |
| 34428        | corticosteroids (for respiratory conditions) | beclometasone dipropionate | beclometasone 50microgram/actuation inhalation powder (neo laboratories ltd)                    |
| 26063        | corticosteroids (for respiratory conditions) | beclometasone dipropionate | beclometasone 100micrograms/dose inhaler (teva uk ltd)                                          |
| 35602        | corticosteroids (for respiratory conditions) | budesonide                 | budesonide 200micrograms/dose dry powder inhalation cartridge                                   |
| 30238        | corticosteroids (for respiratory conditions) | beclometasone dipropionate | beclometasone 50microgram/actuation pressurised inhalation (approved prescription services ltd) |
| 14700        | corticosteroids (for respiratory conditions) | budesonide                 | budesonide 400micrograms/actuation inhaler                                                      |
| 38           | corticosteroids (for respiratory conditions) | beclometasone dipropionate | beclometasone 100micrograms/dose inhaler                                                        |
| 13815        | corticosteroids (for respiratory conditions) | beclometasone dipropionate | beclazone 100microgram/actuation inhalation powder (actavis uk ltd)                             |
| 947          | corticosteroids (for respiratory conditions) | budesonide                 | budesonide 50micrograms/actuation refill canister                                               |
| 10321        | unknown                                      | budesonide                 | budesonide 400microgram inhalation powder capsules                                              |
| 1426         | corticosteroids (for respiratory conditions) | fluticasone propionate     | flixtotide 500microgram disc (allen & hanburys ltd)                                             |
| 3150         | corticosteroids (for respiratory conditions) | beclometasone dipropionate | beclometasone 100micrograms/actuation extrafine particle cfc free inhaler                       |
| 35113        | corticosteroids (for respiratory conditions) | beclometasone dipropionate | beclometasone 200microgram inhalation powder blisters                                           |
| 1424         | corticosteroids (for respiratory conditions) | fluticasone propionate     | flixtotide 250microgram disc (allen & hanburys ltd)                                             |
| 4803         | corticosteroids (for respiratory conditions) | beclometasone dipropionate | beclazone 250microgram/actuation inhalation powder (actavis uk ltd)                             |
| 56493        | corticosteroids (for respiratory conditions) | beclometasone dipropionate | qvar 50micrograms/dose easi-breathe inhaler (sigma pharmaceuticals plc)                         |
| 61664        | corticosteroids (for respiratory conditions) | beclometasone dipropionate | clenil modulite 250micrograms/dose inhaler (waymade healthcare plc)                             |



| Product code | BNF header                                   | Drug substance             | Drug product                                                                                   |
|--------------|----------------------------------------------|----------------------------|------------------------------------------------------------------------------------------------|
| 35772        | corticosteroids (for respiratory conditions) | fluticasone propionate     | fluticasone propionate 100microgram inhalation powder blisters                                 |
| 3119         | corticosteroids (for respiratory conditions) | beclometasone dipropionate | becloforte integra 250microgram/actuation inhaler with compact spacer (glaxo laboratories ltd) |
| 5522         | corticosteroids (for respiratory conditions) | beclometasone dipropionate | beclometasone 100micrograms/dose dry powder inhaler                                            |
| 25204        | corticosteroids (for respiratory conditions) | beclometasone dipropionate | beclometasone 100micrograms/dose inhaler (a a h pharmaceuticals ltd)                           |
| 7724         | corticosteroids (for respiratory conditions) | betamethasone valerate     | betamethasone valerate 100micrograms/actuation inhaler                                         |
| 3743         | corticosteroids (for respiratory conditions) | beclometasone dipropionate | filair 50 inhaler (meda pharmaceuticals ltd)                                                   |
| 1956         | corticosteroids (for respiratory conditions) | budesonide                 | pulmicort 1mg respules (astrazeneca uk ltd)                                                    |
| 56499        | corticosteroids (for respiratory conditions) | fluticasone propionate     | flixtide 500micrograms/dose accuhaler (waymade healthcare plc)                                 |
| 2125         | corticosteroids (for respiratory conditions) | budesonide                 | pulmicort 200microgram refill canister (astrazeneca uk ltd)                                    |
| 36401        | corticosteroids (for respiratory conditions) | fluticasone propionate     | fluticasone propionate 250microgram inhalation powder blisters with device                     |
| 4688         | corticosteroids (for respiratory conditions) | fluticasone propionate     | fluticasone 50microgram/actuation pressurised inhalation                                       |
| 3065         | corticosteroids (for respiratory conditions) | betamethasone valerate     | bexasol inhalation powder (allen & hanburys ltd)                                               |
| 35118        | corticosteroids (for respiratory conditions) | beclometasone dipropionate | becodisks 400microgram with diskhaler (glaxosmithkline uk ltd)                                 |
| 1518         | corticosteroids (for respiratory conditions) | fluticasone propionate     | flixtide 50microgram/actuation inhalation powder (allen & hanburys ltd)                        |
| 5309         | corticosteroids (for respiratory conditions) | fluticasone propionate     | flixtide 50micrograms/dose evohaler (glaxosmithkline uk ltd)                                   |
| 47225        | unknown                                      | budesonide                 | budesonide 9mg gastro-resistant granules sachets                                               |
| 30649        | corticosteroids (for respiratory conditions) | budesonide                 | easyhaler budesonide 400micrograms/dose dry powder inhaler (orion pharma (uk) ltd)             |
| 35580        | corticosteroids (for respiratory conditions) | beclometasone dipropionate | beclometasone 100microgram inhalation powder blisters with device                              |
| 41412        | corticosteroids (for respiratory conditions) | beclometasone dipropionate | beclometasone 400micrograms/actuation inhaler                                                  |
| 20825        | corticosteroids (for respiratory conditions) | beclometasone dipropionate | spacehaler bdp 250microgram/actuation spacehaler (celltech pharma europe ltd)                  |

| Product code | BNF header                                   | Drug substance             | Drug product                                                                                     |
|--------------|----------------------------------------------|----------------------------|--------------------------------------------------------------------------------------------------|
| 35461        | corticosteroids (for respiratory conditions) | fluticasone propionate     | flixtide 250microgram disks with diskhaler (glaxosmithkline uk ltd)                              |
| 42985        | corticosteroids (for respiratory conditions) | fluticasone propionate     | flixtide 50micrograms/dose accuhaler (glaxosmithkline uk ltd)                                    |
| 9921         | corticosteroids (for respiratory conditions) | beclometasone dipropionate | beclometasone 100micrograms/dose breath actuated inhaler cfc free                                |
| 56474        | corticosteroids (for respiratory conditions) | fluticasone propionate     | flixtide 125micrograms/dose evohaler (de pharmaceuticals)                                        |
| 35986        | corticosteroids (for respiratory conditions) | fluticasone propionate     | flixtide 50microgram disks (glaxosmithkline uk ltd)                                              |
| 11149        | glucocorticoid therapy                       | betamethasone              | betnelan 500microgram tablets (focus pharmaceuticals ltd)                                        |
| 1243         | corticosteroids (for respiratory conditions) | beclometasone dipropionate | beclazone 250 easi-breathe inhaler (teva uk ltd)                                                 |
| 31774        | corticosteroids (for respiratory conditions) | beclometasone dipropionate | beclometasone 50micrograms/dose inhaler (generics (uk) ltd)                                      |
| 56477        | corticosteroids (for respiratory conditions) | fluticasone propionate     | flixtide 100micrograms/dose accuhaler (waymade healthcare plc)                                   |
| 2600         | corticosteroids (for respiratory conditions) | beclometasone dipropionate | beclometasone 250micrograms/dose breath actuated inhaler                                         |
| 16151        | corticosteroids (for respiratory conditions) | beclometasone dipropionate | clenil modulite 200micrograms/dose inhaler (chiesi ltd)                                          |
| 1100         | corticosteroids (for respiratory conditions) | beclometasone dipropionate | beclazone 100 inhaler (teva uk ltd)                                                              |
| 1951         | corticosteroids (for respiratory conditions) | beclometasone dipropionate | becodisks 400microgram disc (allen & hanburys ltd)                                               |
| 7948         | corticosteroids (for respiratory conditions) | fluticasone propionate     | fluticasone propionate 250micrograms/dose dry powder inhaler                                     |
| 21482        | corticosteroids (for respiratory conditions) | beclometasone dipropionate | beclometasone 100micrograms/dose inhaler (generics (uk) ltd)                                     |
| 9477         | corticosteroids (for respiratory conditions) | beclometasone dipropionate | asmabec 100microgram/actuation spacehaler (celltech pharma europe ltd)                           |
| 27679        | corticosteroids (for respiratory conditions) | beclometasone dipropionate | beclometasone 100microgram/actuation pressurised inhalation (approved prescription services ltd) |
| 35652        | corticosteroids (for respiratory conditions) | beclometasone dipropionate | beclometasone 100microgram inhalation powder blisters                                            |
| 46157        | corticosteroids (for respiratory conditions) | beclometasone dipropionate | beclometasone 200 cyclocaps (teva uk ltd)                                                        |
| 56484        | corticosteroids (for respiratory conditions) | fluticasone propionate     | flixtide 250micrograms/dose accuhaler (waymade healthcare plc)                                   |
| 3442         | unknown                                      |                            | pulmicort complete 200 mcg inh                                                                   |

| <b>Product code</b> | <b>BNF header</b>                            | <b>Drug substance</b>      | <b>Drug product</b>                                                          |
|---------------------|----------------------------------------------|----------------------------|------------------------------------------------------------------------------|
| 28761               | corticosteroids (for respiratory conditions) | beclometasone dipropionate | spacehaler bdp 50microgram/actuation spacehaler (celltech pharma europe ltd) |
| 5992                | corticosteroids (for respiratory conditions) | beclometasone dipropionate | beclometasone 50micrograms/dose dry powder inhaler                           |
| 454                 | corticosteroids (for respiratory conditions) | budesonide                 | pulmicort 200microgram inhaler (astrazeneca uk ltd)                          |
| 3220                | corticosteroids (for respiratory conditions) | beclometasone dipropionate | qvar 50 autohaler (teva uk ltd)                                              |
| 18537               | unknown                                      | budesonide                 | budesonide 200microgram inhalation powder capsules                           |
| 57555               | corticosteroids (for respiratory conditions) | fluticasone propionate     | flixtide 125micrograms/dose evohaler (dowelhurst ltd)                        |
| 48709               | corticosteroids (for respiratory conditions) | beclometasone dipropionate | qvar 100micrograms/dose easi-breathe inhaler (sigma pharmaceuticals plc)     |
| 16584               | corticosteroids (for respiratory conditions) | beclometasone dipropionate | beclometasone 50micrograms/dose inhaler cfc free                             |
| 35392               | corticosteroids (for respiratory conditions) | fluticasone propionate     | flixtide 500microgram disks with diskhaler (glaxosmithkline uk ltd)          |

## FP\_SAL codes

| Product code | BNF header                                                             | Drug substance                              | Drug product                                                                                |
|--------------|------------------------------------------------------------------------|---------------------------------------------|---------------------------------------------------------------------------------------------|
| 638          | Selective Beta 2 Agonists/Corticosteroids (for Respiratory Conditions) | Fluticasone propionate/Salmeterol xinafoate | Seretide 250 Accuhaler (GlaxoSmithKline UK Ltd)                                             |
| 665          | Selective Beta 2 Agonists/Corticosteroids (for Respiratory Conditions) | Salmeterol xinafoate/Fluticasone propionate | Seretide 100 Accuhaler (GlaxoSmithKline UK Ltd)                                             |
| 3666         | Selective Beta 2 Agonists/Corticosteroids (for Respiratory Conditions) | Salmeterol xinafoate/Fluticasone propionate | Seretide 500 Accuhaler (GlaxoSmithKline UK Ltd)                                             |
| 5143         | Selective Beta 2 Agonists/Corticosteroids (for Respiratory Conditions) | Fluticasone propionate/Salmeterol xinafoate | Seretide 50 Evohaler (GlaxoSmithKline UK Ltd)                                               |
| 5161         | Selective Beta 2 Agonists/Corticosteroids (for Respiratory Conditions) | Fluticasone propionate/Salmeterol xinafoate | Seretide 125 Evohaler (GlaxoSmithKline UK Ltd)                                              |
| 5172         | Selective Beta 2 Agonists/Corticosteroids (for Respiratory Conditions) | Fluticasone propionate/Salmeterol xinafoate | Seretide 250 Evohaler (GlaxoSmithKline UK Ltd)                                              |
| 5558         | Selective Beta 2 Agonists/Corticosteroids (for Respiratory Conditions) | Salmeterol Xinafoate/Fluticasone Propionate | Salmeterol 50micrograms with fluticasone 500micrograms CFC free inhaler                     |
| 5864         | Selective Beta 2 Agonists/Corticosteroids (for Respiratory Conditions) | Salmeterol Xinafoate/Fluticasone Propionate | Salmeterol 25micrograms with fluticasone 250micrograms CFC free inhaler                     |
| 5942         | Selective Beta 2 Agonists/Corticosteroids (for Respiratory Conditions) | Salmeterol Xinafoate/Fluticasone Propionate | Salmeterol 50micrograms with fluticasone 250micrograms CFC free inhaler                     |
| 6569         | Selective Beta 2 Agonists/Corticosteroids (for Respiratory Conditions) | Salmeterol Xinafoate/Fluticasone Propionate | Salmeterol 25micrograms with fluticasone 125micrograms CFC free inhaler                     |
| 6616         | Selective Beta 2 Agonists/Corticosteroids (for Respiratory Conditions) | Salmeterol Xinafoate/Fluticasone Propionate | Salmeterol 25micrograms with fluticasone 50micrograms CFC free inhaler                      |
| 6938         | Selective Beta 2 Agonists/Corticosteroids (for Respiratory Conditions) | Salmeterol Xinafoate/Fluticasone Propionate | Salmeterol 50micrograms with fluticasone 100micrograms dry powder inhaler                   |
| 11410        | Selective Beta 2 Agonists/Corticosteroids (for Respiratory Conditions) | Salmeterol xinafoate/Fluticasone propionate | Fluticasone propionate 500micrograms/dose / Salmeterol 50micrograms/dose dry powder inhaler |
| 11588        | Selective Beta 2 Agonists/Corticosteroids (for Respiratory Conditions) | Fluticasone propionate/Salmeterol xinafoate | Fluticasone 125micrograms/dose / Salmeterol 25micrograms/dose inhaler CFC free              |
| 11618        | Selective Beta 2 Agonists/Corticosteroids (for Respiratory Conditions) | Fluticasone propionate/Salmeterol xinafoate | Fluticasone 250micrograms/dose / Salmeterol 25micrograms/dose inhaler CFC free              |
| 12994        | Selective Beta 2 Agonists/Corticosteroids (for Respiratory Conditions) | Fluticasone propionate/Salmeterol xinafoate | Fluticasone 50micrograms/dose / Salmeterol 25micrograms/dose inhaler CFC free               |

| Product code | BNF header                                                             | Drug substance                                       | Drug product                                                                                |
|--------------|------------------------------------------------------------------------|------------------------------------------------------|---------------------------------------------------------------------------------------------|
| 13040        | Selective Beta 2 Agonists/Corticosteroids (for Respiratory Conditions) | Fluticasone propionate/Salmeterol xinafoate          | Fluticasone propionate 250micrograms/dose / Salmeterol 50micrograms/dose dry powder inhaler |
| 13273        | Selective Beta 2 Agonists/Corticosteroids (for Respiratory Conditions) | Salmeterol xinafoate/Fluticasone propionate          | Fluticasone propionate 100micrograms/dose / Salmeterol 50micrograms/dose dry powder inhaler |
| 48739        | Selective Beta 2 Agonists/Corticosteroids (for Respiratory Conditions) | Fluticasone propionate/Salmeterol xinafoate          | Seretide 250 Evohaler (DE Pharmaceuticals)                                                  |
| 49000        | Selective Beta 2 Agonists/Corticosteroids (for Respiratory Conditions) | Fluticasone propionate/Salmeterol xinafoate          | Seretide 250 Evohaler (Waymade Healthcare Plc)                                              |
| 50560        | Selective Beta 2 Agonists/Corticosteroids (for Respiratory Conditions) | Fluticasone propionate/Salmeterol xinafoate          | Seretide 250 Accuhaler (Sigma Pharmaceuticals Plc)                                          |
| 50689        | Selective Beta 2 Agonists/Corticosteroids (for Respiratory Conditions) | Fluticasone propionate/Formoterol fumarate dihydrate | Flutiform 50micrograms/dose / 5micrograms/dose inhaler (Napp Pharmaceuticals Ltd)           |
| 50886        | Selective Beta 2 Agonists/Corticosteroids (for Respiratory Conditions) | Fluticasone propionate/Salmeterol xinafoate          | Seretide 250 Evohaler (Stephar (U.K.) Ltd)                                                  |
| 51027        | Selective Beta 2 Agonists/Corticosteroids (for Respiratory Conditions) | Fluticasone propionate/Salmeterol xinafoate          | Seretide 125 Evohaler (DE Pharmaceuticals)                                                  |
| 51151        | Selective Beta 2 Agonists/Corticosteroids (for Respiratory Conditions) | Fluticasone propionate/Salmeterol xinafoate          | Seretide 125 Evohaler (Lexon (UK) Ltd)                                                      |
| 51270        | Selective Beta 2 Agonists/Corticosteroids (for Respiratory Conditions) | Fluticasone propionate/Formoterol fumarate dihydrate | Fluticasone 50micrograms/dose / Formoterol 5micrograms/dose inhaler CFC free                |
| 51394        | Selective Beta 2 Agonists/Corticosteroids (for Respiratory Conditions) | Salmeterol xinafoate/Fluticasone propionate          | Seretide 500 Accuhaler (Waymade Healthcare Plc)                                             |
| 51593        | Selective Beta 2 Agonists/Corticosteroids (for Respiratory Conditions) | Salmeterol xinafoate/Fluticasone propionate          | Seretide 500 Accuhaler (DE Pharmaceuticals)                                                 |
| 51861        | Selective Beta 2 Agonists/Corticosteroids (for Respiratory Conditions) | Salmeterol xinafoate/Fluticasone propionate          | Seretide 500 Accuhaler (Mawdsley-Brooks & Company Ltd)                                      |
| 51909        | Selective Beta 2 Agonists/Corticosteroids (for Respiratory Conditions) | Fluticasone propionate/Salmeterol xinafoate          | Seretide 250 Evohaler (Necessity Supplies Ltd)                                              |
| 53230        | Selective Beta 2 Agonists/Corticosteroids (for Respiratory Conditions) | Fluticasone propionate/Salmeterol xinafoate          | Seretide 250 Accuhaler (DE Pharmaceuticals)                                                 |
| 53283        | Selective Beta 2 Agonists/Corticosteroids (for Respiratory Conditions) | Salmeterol xinafoate/Fluticasone propionate          | Seretide 100 Accuhaler (Waymade Healthcare Plc)                                             |
| 55411        | Corticosteroids Used In Nasal Allergy/Antihistamines In Nasal Allergy  | Fluticasone propionate/Azelastine hydrochloride      | Fluticasone propionate 50micrograms/dose / Azelastine 137micrograms/dose nasal spray        |
| 55435        | Corticosteroids Used In Nasal Allergy/Antihistamines In Nasal Allergy  | Fluticasone propionate/Azelastine hydrochloride      | Dymista 137micrograms/dose / 50micrograms/dose nasal spray (Meda Pharmaceuticals Ltd)       |

| <b>Product code</b> | <b>BNF header</b>                                                      | <b>Drug substance</b>                       | <b>Drug product</b>                                                 |
|---------------------|------------------------------------------------------------------------|---------------------------------------------|---------------------------------------------------------------------|
| 55677               | Selective Beta 2 Agonists/Corticosteroids (for Respiratory Conditions) | Salmeterol xinafoate/Fluticasone propionate | Seretide 500 Accuhaler (Lexon (UK) Ltd)                             |
| 61280               | Selective Beta 2 Agonists/Corticosteroids (for Respiratory Conditions) | Fluticasone propionate/Salmeterol xinafoate | Seretide 250 Accuhaler (Waymade Healthcare Plc)                     |
| 62126               | Selective Beta 2 Agonists/Corticosteroids (for Respiratory Conditions) | Salmeterol xinafoate/Fluticasone propionate | Seretide 100 Accuhaler (DE Pharmaceuticals)                         |
| 63252               | Selective Beta 2 Agonists/Corticosteroids (for Respiratory Conditions) | Fluticasone propionate/Salmeterol xinafoate | Seretide 250 Evohaler (Lexon (UK) Ltd)                              |
| 63945               | Selective Beta 2 Agonists/Corticosteroids (for Respiratory Conditions) | Fluticasone propionate/Salmeterol xinafoate | Seretide 250 Accuhaler (Lexon (UK) Ltd)                             |
| 64372               | Selective Beta 2 Agonists/Corticosteroids (for Respiratory Conditions) | Fluticasone propionate/Salmeterol xinafoate | Sirdupla 25micrograms/dose / 125micrograms/dose inhaler (Mylan Ltd) |
| 64373               | Selective Beta 2 Agonists/Corticosteroids (for Respiratory Conditions) | Fluticasone propionate/Salmeterol xinafoate | Sirdupla 25micrograms/dose / 250micrograms/dose inhaler (Mylan Ltd) |
| 65117               | Selective Beta 2 Agonists/Corticosteroids (for Respiratory Conditions) | Fluticasone propionate/Salmeterol xinafoate | Seretide 125 Evohaler (Mawdsley-Brooks & Company Ltd)               |
